# Supplementary material for: Whole-Genome DNA Methylation Analysis in Brassica rapa subsp. perviridis in Response to Albugo candida Infection
Source: Front Plant Sci. 2022 Jun 23;13:849358. doi: 10.3389/fpls.2022.849358 (PMC9261781; doi:10.3389/fpls.2022.849358)
Supplement: Supplementary file 2 [file Data_Sheet_2.xlsx]

## Sheet: Table S1
Supplementary Table S1. Sequences of primers used for qPCR or bisulfite sequencing
Name	Primer sequences (5'-3')
qPCR
BraA08g025160.3C	CTCAGAAGTTTGAGTTCGAC	TTGACGTCCCTTCTCTCTAT
BraA09g060940.3C	AGATCCGATCAAGAAACTCC	AGTTGCTTCCCTGGCCATTG
BraA10g002450.3C	ATGGCTATCGCACGTCTAAC	CTTGTTCCCCAACTTGAGTG
BraA07g015170.3C	TCCATCACCGAGGTCACAAC	GGATCTTTCTTCTCAACTGC
BraA04g028840.3C	AGTTGCAACGGTGGAGATTC	TGTCCATATTTCCTCCAAGC
BraA08g000690.3C	TGAACAAGTTGTCTTCAAGC	CTAGGTCTGCAAGCTTGTTG
BraA02g042070.3C	GTCTCTCCGAAGTTTCTCAG	GCATGCCAAAGAACTCATGT
Bisulfite sequencing
CHH DMRs (hyper-methylated) in ‘Misugi’	YAYTGATTTGAAATAYGTAGAAATG	CARTTTRCATTAATTATTRRCCACAC
CHH DMRs (hypo-methylated) in ‘Misugi’	AGYAATYYYAYTTTGAGATGAAAAG	AAARTTRTRACTATTCACTARTATC
CHH DMRs (hyper-methylated) in ‘Nanane’	AYYYTYATGYTAGCTTGTGGGGTAG	CCRAAATAACRCACCAAATCACCAC
CHH DMRs (hypo-methylated) in ‘Nanane’	TGGATGAAAGAAAATGAGGGAATGG	ATTTCCRATCATTRRCCTCTAC

## Sheet: Table S2
Supplementary Table S2. Mapped RNA-sequencing reads to reference genome
Sample name	Total reads (paired)	Aligned concordantly exactly 1 time
Misugi_C_1	10608283	9000382	0.8484
Misugi_C_2	10607580	9003086	0.8487
Misugi_I_1	9795608	7028791	0.7175
Misugi_I_2	9570890	7839342	0.8191
Nanane_C_1	11368565	9698614	0.8531
Nanane_C_2	9717963	8245979	0.8485
Nanane_I_1	9681451	8324768	0.8599
Nanane_C_2	9198246	7905154	0.8594
C, control samples
I, infected samples

## Sheet: Table S3
Supplementary Table S3. Position of total number of differentially methylated regions (DMRs) in komatsuna cultivars 'Misugi' (susceptible) and 'Nanane' (resistant).
Cultivar	Chromosome	DMR Start	DMR End	DMR MS	DMR location to gene	Distance of DMR to Gene (bp)	DMR Type	DMR Gene	DMR TEa	RGA type	Differentially expressed (13 genes)b	Heterochromatic regionc
Misugi	A01	7974001	7974498	Hyper	Gene body	0	CG	ID=BraA01g015020.3C;
Misugi	A01	8380013	8380499	Hyper	Gene body	0	CG	ID=BraA01g015800.3C;
Misugi	A01	11014001	11014500	Hyper	Gene body	0	CG	ID=BraA01g020500.3C;
Misugi	A02	8233002	8233498	Hyper	Gene body	0	CG	ID=BraA02g015640.3C;
Misugi	A02	16500005	16500500	Hyper	Gene body	0	CG	ID=BraA02g027100.3C;
Misugi	A03	8127503	8127998	Hyper	Gene body	0	CG	ID=BraA03g017490.3C;
Misugi	A03	17067513	17067997	Hyper	Gene body	0	CG	ID=BraA03g034550.3C;
Misugi	A04	3945503	3945966	Hyper	Gene body	0	CG	ID=BraA04g005920.3C;
Misugi	A06	308008	308500	Hypo	Gene body	0	CG	ID=BraA06g000420.3C;			YES
Misugi	A06	10594502	10594951	Hyper	Gene body	0	CG	ID=BraA06g018720.3C;
Misugi	A06	11343502	11343997	Hyper	Gene body	0	CG	ID=BraA06g019710.3C;			YES
Misugi	A06	17777503	17778000	Hyper	Gene body	0	CG	ID=BraA06g025470.3C;
Misugi	A07	14396002	14396498	Hyper	Gene body	0	CG	ID=BraA07g016280.3C;
Misugi	A08	14245501	14245999	Hypo	Gene body	0	CG	ID=BraA08g017790.3C;
Misugi	A09	40964006	40964498	Hyper	Gene body	0	CG	ID=BraA09g060940.3C;			YES
Misugi	A10	601502	601969	Hypo	Gene body	0	CG	ID=BraA10g011740.3C;
Misugi	A10	9661501	9661999	Hyper	Gene body	0	CG	ID=BraA10g001160.3C;	YES			YES
Misugi	A05	16210010	16210500	Hyper	Upstream	2	CG	ID=BraA05g022430.3C;	YES			YES
Misugi	A09	42603002	42603500	Hyper	Upstream	126	CG	ID=BraA09g060930.3C;
Misugi	A09	42603002	42603500	Hyper	Downstream	189	CG	ID=BraA09g057630.3C;
Misugi	A04	18987002	18987500	Hypo	Upstream	919	CG	ID=BraA04g026760.3C;
Misugi	A01	6991502	6991999	Hyper	Gene body	0	CHG	ID=BraA01g013350.3C;
Misugi	A02	10337503	10337998	Hypo	Gene body	0	CHG	ID=BraA02g018450.3C;
Misugi	A02	18756002	18756500	Hypo	Gene body	0	CHG	ID=BraA02g029280.3C;				YES
Misugi	A02	21695501	21696000	Hyper	Gene body	0	CHG	ID=BraA02g031670.3C;	YES
Misugi	A02	25549501	25549996	Hypo	Gene body	0	CHG	ID=BraA02g036630.3C;	YES			YES
Misugi	A03	21020002	21020495	Hyper	Gene body	0	CHG	ID=BraA03g041880.3C;
Misugi	A03	26190002	26190468	Hypo	Gene body	0	CHG	ID=BraA03g050890.3C;		RLK
Misugi	A04	2367502	2368000	Hypo	Gene body	0	CHG	ID=BraA04g003830.3C;	YES
Misugi	A04	5512501	5512996	Hyper	Gene body	0	CHG	ID=BraA04g007940.3C;	YES
Misugi	A05	1639037	1639498	Hypo	Gene body	0	CHG	ID=BraA05g003020.3C;
Misugi	A05	12290007	12290484	Hyper	Gene body	0	CHG	ID=BraA05g019290.3C;				YES
Misugi	A05	15762501	15763000	Hypo	Gene body	0	CHG	ID=BraA05g022040.3C;	YES			YES
Misugi	A05	26441002	26441498	Hypo	Gene body	0	CHG	ID=BraA05g038770.3C;
Misugi	A06	6619501	6620000	Hyper	Gene body	0	CHG	ID=BraA06g012450.3C;
Misugi	A08	4284021	4284496	Hypo	Gene body	0	CHG	ID=BraA08g005470.3C;				YES
Misugi	A09	10465524	10465995	Hyper	Gene body	0	CHG	ID=BraA09g016960.3C;	YES
Misugi	A09	22730504	22731000	Hypo	Gene body	0	CHG	ID=BraA09g030360.3C;				YES
Misugi	A09	24034507	24034993	Hypo	Gene body	0	CHG	ID=BraA09g031080.3C;	YES			YES
Misugi	A09	30879002	30879499	Hyper	Gene body	0	CHG	ID=BraA09g039420.3C;
Misugi	A10	9324501	9325000	Hypo	Gene body	0	CHG	ID=BraA10g011260.3C;
Misugi	A08	2976001	2976470	Hyper	Downstream	27	CHG	ID=BraA08g004100.3C;				YES
Misugi	A01	22020501	22021000	Hyper	Upstream	53	CHG	ID=BraA01g032250.3C;
Misugi	A03	867001	867499	Hypo	Downstream	72	CHG	ID=BraA03g001910.3C;
Misugi	A10	10691503	10691994	Hypo	Upstream	216	CHG	ID=BraA10g013010.3C;
Misugi	A07	2461501	2461999	Hypo	Upstream	221	CHG	ID=BraA07g003250.3C;
Misugi	A06	29048501	29048999	Hypo	Downstream	249	CHG	ID=BraA06g044790.3C;	YES
Misugi	A04	9802503	9802998	Hypo	Downstream	296	CHG	ID=BraA04g012450.3C;	YES
Misugi	A09	11031003	11031444	Hyper	Downstream	328	CHG	ID=BraA09g017670.3C;
Misugi	A06	14458002	14458499	Hypo	Upstream	630	CHG	ID=BraA06g022570.3C;	YES			YES
Misugi	A09	5055503	5055997	Hyper	Downstream	729	CHG	ID=BraA09g008890.3C;
Misugi	A04	2365501	2366000	Hypo	Upstream	751	CHG	ID=BraA04g003830.3C;	YES
Misugi	A09	5055503	5055997	Hyper	Upstream	783	CHG	ID=BraA09g008900.3C;
Misugi	A03	37285001	37285498	Hyper	Upstream	860	CHG	ID=BraA03g064870.3C;	YES			YES
Misugi	A06	6751502	6751999	Hyper	Downstream	878	CHG	ID=BraA06g012720.3C;
Misugi	A08	22175004	22175500	Hyper	Upstream	964	CHG	ID=BraA08g033890.3C;
Misugi	A02	19364502	19365000	Hypo	Downstream	980	CHG	ID=BraA02g029570.3C;	YES			YES
Misugi	A07	25204008	25204492	Hyper	Downstream	992	CHG	ID=BraA07g035760.3C;
Misugi	A06	20512504	20513000	Hypo	Upstream	1060	CHG	ID=BraA06g029660.3C;	YES
Misugi	A06	19050508	19051000	Hyper	Downstream	1077	CHG	ID=BraA06g027190.3C;
Misugi	A09	3138001	3138498	Hyper	Upstream	1111	CHG	ID=BraA09g005310.3C;	YES
Misugi	A03	867001	867499	Hypo	Upstream	1187	CHG	ID=BraA03g001920.3C;
Misugi	A09	25692511	25693000	Hyper	Downstream	1201	CHG	ID=BraA09g033040.3C;				YES
Misugi	A09	12167503	12167998	Hypo	Downstream	1411	CHG	ID=BraA09g019000.3C;
Misugi	A05	18742001	18742491	Hypo	Downstream	1527	CHG	ID=BraA05g024960.3C;
Misugi	A01	14508001	14508499	Hyper	Downstream	1557	CHG	ID=BraA01g024750.3C;	YES
Misugi	A03	21481001	21481498	Hyper	Upstream	1588	CHG	ID=BraA03g042750.3C;	YES
Misugi	A06	4784001	4784499	Hypo	Downstream	1598	CHG	ID=BraA06g008730.3C;
Misugi	A02	17151501	17151984	Hyper	Downstream	1614	CHG	ID=BraA02g027810.3C;				YES
Misugi	A08	2147502	2148000	Hypo	Downstream	1638	CHG	ID=BraA08g002850.3C;	YES
Misugi	A07	25204008	25204492	Hyper	Upstream	1688	CHG	ID=BraA07g035770.3C;
Misugi	A06	21674004	21674500	Hyper	Upstream	1705	CHG	ID=BraA06g031450.3C;
Misugi	A06	12904001	12904497	Hypo	Upstream	1776	CHG	ID=BraA06g021560.3C;	YES
Misugi	A09	39621501	39622000	Hypo	Upstream	1788	CHG	ID=BraA09g054760.3C;
Misugi	A09	31044002	31044500	Hypo	Downstream	1802	CHG	ID=BraA09g039700.3C;
Misugi	A07	2461501	2461999	Hypo	Downstream	1813	CHG	ID=BraA07g003240.3C;
Misugi	A05	15496014	15496498	Hypo	Upstream	1853	CHG	ID=BraA05g021760.3C;	YES
Misugi	A01	12700504	12700999	Hypo			CHG		YES			YES
Misugi	A01	14052001	14052498	Hyper			CHG		YES			YES
Misugi	A01	15203003	15203500	Hypo			CHG		YES			YES
Misugi	A01	15614001	15614500	Hypo			CHG		YES			YES
Misugi	A01	15794502	15794999	Hypo			CHG
Misugi	A01	15849505	15850000	Hypo			CHG		YES			YES
Misugi	A01	16014002	16014500	Hypo			CHG					YES
Misugi	A01	18067001	18067499	Hypo			CHG
Misugi	A02	18235002	18235499	Hypo			CHG					YES
Misugi	A02	18672003	18672500	Hypo			CHG		YES			YES
Misugi	A02	18679002	18679497	Hypo			CHG					YES
Misugi	A02	18769001	18769500	Hypo			CHG					YES
Misugi	A02	18952003	18952499	Hypo			CHG		YES			YES
Misugi	A02	19098003	19098499	Hypo			CHG					YES
Misugi	A02	19341501	19341999	Hypo			CHG					YES
Misugi	A02	19537502	19538000	Hypo			CHG		YES			YES
Misugi	A02	19740505	19741000	Hypo			CHG		YES
Misugi	A02	19858003	19858500	Hypo			CHG		YES			YES
Misugi	A02	20024003	20024492	Hypo			CHG		YES			YES
Misugi	A02	20105001	20105490	Hypo			CHG					YES
Misugi	A03	8153506	8153998	Hypo			CHG		YES
Misugi	A03	8155501	8156000	Hypo			CHG
Misugi	A03	32453501	32453999	Hypo			CHG		YES
Misugi	A03	33855001	33855500	Hyper			CHG		YES			YES
Misugi	A03	35085512	35085998	Hypo			CHG		YES			YES
Misugi	A03	35129002	35129499	Hyper			CHG					YES
Misugi	A03	36870003	36870487	Hyper			CHG					YES
Misugi	A03	36905502	36905999	Hypo			CHG		YES			YES
Misugi	A03	37168503	37168997	Hyper			CHG					YES
Misugi	A03	37342501	37343000	Hyper			CHG		YES			YES
Misugi	A04	819132	819498	Hyper			CHG
Misugi	A04	3268016	3268497	Hyper			CHG		YES
Misugi	A04	7084502	7085000	Hyper			CHG		YES			YES
Misugi	A04	7391502	7391953	Hyper			CHG					YES
Misugi	A04	18402001	18402500	Hypo			CHG
Misugi	A04	19200508	19200998	Hypo			CHG		YES
Misugi	A05	734502	735000	Hyper			CHG		YES
Misugi	A05	4996005	4996500	Hyper			CHG		YES
Misugi	A05	8736004	8736496	Hypo			CHG		YES			YES
Misugi	A05	10163504	10164000	Hyper			CHG
Misugi	A05	11047510	11048000	Hypo			CHG		YES
Misugi	A05	14487003	14487497	Hypo			CHG		YES			YES
Misugi	A05	14922002	14922500	Hyper			CHG					YES
Misugi	A05	17765001	17765493	Hypo			CHG
Misugi	A05	18118503	18119000	Hypo			CHG		YES			YES
Misugi	A05	23410001	23410479	Hypo			CHG		YES
Misugi	A06	13392003	13392498	Hypo			CHG		YES			YES
Misugi	A06	13960501	13961000	Hypo			CHG		YES			YES
Misugi	A06	13973504	13973999	Hypo			CHG					YES
Misugi	A06	14144504	14145000	Hypo			CHG		YES			YES
Misugi	A06	14293501	14293997	Hypo			CHG		YES			YES
Misugi	A06	14478502	14478995	Hypo			CHG		YES			YES
Misugi	A06	15920002	15920498	Hypo			CHG		YES			YES
Misugi	A06	28474502	28474999	Hyper			CHG		YES
Misugi	A07	1601502	1602000	Hypo			CHG
Misugi	A07	7071002	7071500	Hyper			CHG		YES			YES
Misugi	A08	1740001	1740498	Hyper			CHG		YES
Misugi	A09	21767001	21767499	Hypo			CHG					YES
Misugi	A09	22310003	22310496	Hypo			CHG		YES			YES
Misugi	A09	23042003	23042499	Hypo			CHG					YES
Misugi	A09	23187001	23187498	Hypo			CHG		YES			YES
Misugi	A09	23388502	23389000	Hypo			CHG					YES
Misugi	A09	26797502	26797999	Hyper			CHG					YES
Misugi	A09	37265501	37266000	Hyper			CHG		YES
Misugi	A09	38437020	38437493	Hyper			CHG
Misugi	A10	13244501	13244997	Hyper			CHG		YES
Misugi	A10	14462503	14463000	Hypo			CHG		YES
Misugi	A01	7030503	7030999	Hypo	Gene body	0	CHH	ID=BraA01g013410.3C;
Misugi	A01	12996503	12996999	Hyper	Gene body	0	CHH	ID=BraA01g022970.3C;	YES			YES
Misugi	A01	13061507	13061999	Hyper	Gene body	0	CHH	ID=BraA01g023070.3C;
Misugi	A01	16694001	16694500	Hyper	Gene body	0	CHH	ID=BraA01g026530.3C;				YES
Misugi	A02	8149001	8149500	Hypo	Gene body	0	CHH	ID=BraA02g015530.3C;	YES
Misugi	A03	33001001	33001499	Hypo	Gene body	0	CHH	ID=BraA03g061500.3C;
Misugi	A03	35449504	35449999	Hyper	Gene body	0	CHH	ID=BraA03g063020.3C;	YES			YES
Misugi	A04	13850001	13850499	Hyper	Gene body	0	CHH	ID=BraA04g018290.3C;
Misugi	A04	18443203	18443500	Hyper	Gene body	0	CHH	ID=BraA04g025780.3C;
Misugi	A05	9901505	9902000	Hyper	Gene body	0	CHH	ID=BraA05g016640.3C;	YES			YES
Misugi	A05	18435002	18435498	Hypo	Gene body	0	CHH	ID=BraA05g024550.3C;				YES
Misugi	A06	8399003	8399500	Hyper	Gene body	0	CHH	ID=BraA06g015530.3C;	YES
Misugi	A07	10671009	10671499	Hypo	Gene body	0	CHH	ID=BraA07g010850.3C;	YES
Misugi	A07	14119502	14119907	Hyper	Gene body	0	CHH	ID=BraA07g015930.3C;	YES
Misugi	A07	18481542	18482000	Hyper	Gene body	0	CHH	ID=BraA07g023140.3C;
Misugi	A08	5236001	5236495	Hypo	Gene body	0	CHH	ID=BraA08g006390.3C;				YES
Misugi	A09	4324501	4325000	Hypo	Gene body	0	CHH	ID=BraA09g007460.3C;	YES
Misugi	A09	26130001	26130500	Hypo	Gene body	0	CHH	ID=BraA09g033450.3C;	YES			YES
Misugi	A10	1261504	1261998	Hyper	Gene body	0	CHH	ID=BraA10g002450.3C;			YES
Misugi	A10	9324501	9325000	Hypo	Gene body	0	CHH	ID=BraA10g011260.3C;
Misugi	A10	9548501	9548998	Hyper	Gene body	0	CHH	ID=BraA10g011620.3C;	YES
Misugi	A10	9637507	9638000	Hypo	Gene body	0	CHH	ID=BraA10g011710.3C;	YES			YES
Misugi	A07	3118003	3118500	Hyper	Downstream	37	CHH	ID=BraA07g004090.3C;
Misugi	A01	22020501	22021000	Hyper	Upstream	53	CHH	ID=BraA01g032250.3C;
Misugi	A07	7728001	7728499	Hypo	Gene body	111	CHH	ID=BraA07g007530.3C;	YES
Misugi	A01	17638001	17638493	Hyper	Downstream	148	CHH	ID=BraA01g027330.3C;	YES
Misugi	A09	13934001	13934500	Hyper	Upstream	196	CHH	ID=BraA09g021410.3C;	YES		YES
Misugi	A05	18085235	18085496	Hypo	Upstream	230	CHH	ID=BraA05g024280.3C;
Misugi	A05	17606008	17606500	Hyper	Downstream	262	CHH	ID=BraA05g023720.3C;
Misugi	A09	12333503	12333998	Hyper	Downstream	270	CHH	ID=BraA09g019270.3C;
Misugi	A01	18156001	18156494	Hyper	Upstream	273	CHH	ID=BraA01g027930.3C;
Misugi	A07	7728001	7728499	Hypo	Gene body	353	CHH	ID=BraA07g007520.3C;	YES
Misugi	A08	18184006	18184500	Hyper	Downstream	362	CHH	ID=BraA08g025160.3C;	YES		YES
Misugi	A01	18452501	18452998	Hypo	Downstream	381	CHH	ID=BraA01g028230.3C;	YES			YES
Misugi	A06	23267002	23267491	Hyper	Upstream	438	CHH	ID=BraA06g034180.3C;		RLK
Misugi	A06	5265004	5265500	Hyper	Downstream	481	CHH	ID=BraA06g009670.3C;
Misugi	A08	18184006	18184500	Hyper	Upstream	534	CHH	ID=BraA08g025170.3C;	YES
Misugi	A06	5265004	5265500	Hyper	Upstream	652	CHH	ID=BraA06g009680.3C;	YES
Misugi	A09	24654503	24655000	Hypo	Upstream	659	CHH	ID=BraA09g031770.3C;	YES
Misugi	A03	36501506	36501999	Hyper	Upstream	711	CHH	ID=BraA03g063990.3C;				YES
Misugi	A03	36501506	36501999	Hyper	Downstream	730	CHH	ID=BraA03g063980.3C;				YES
Misugi	A05	10729503	10730000	Hyper	Downstream	735	CHH	ID=BraA05g017740.3C;
Misugi	A07	11407001	11407374	Hyper	Upstream	737	CHH	ID=BraA07g011690.3C;
Misugi	A06	25797003	25797490	Hyper	Downstream	744	CHH	ID=BraA06g038780.3C;	YES
Misugi	A07	17746501	17746998	Hyper	Upstream	860	CHH	ID=BraA07g021870.3C;	YES
Misugi	A05	18043158	18043498	Hyper	Downstream	1065	CHH	ID=BraA05g024230.3C;	YES
Misugi	A03	32346001	32346499	Hyper	Upstream	1163	CHH	ID=BraA03g060690.3C;			YES
Misugi	A10	13977505	13977999	Hyper	Downstream	1248	CHH	ID=BraA10g018910.3C;	YES
Misugi	A01	18156001	18156494	Hyper	Downstream	1308	CHH	ID=BraA01g027920.3C;
Misugi	A06	17361503	17361999	Hyper	Downstream	1323	CHH	ID=BraA06g024950.3C;	YES
Misugi	A02	7289517	7290000	Hyper	Downstream	1487	CHH	ID=BraA02g014200.3C;
Misugi	A07	24122001	24122500	Hyper	Upstream	1548	CHH	ID=BraA07g033820.3C;	YES
Misugi	A06	4784001	4784499	Hypo	Downstream	1598	CHH	ID=BraA06g008730.3C;	YES
Misugi	A04	7117003	7117498	Hyper	Upstream	1702	CHH	ID=BraA04g009410.3C;				YES
Misugi	A08	4291501	4292000	Hyper	Downstream	1744	CHH	ID=BraA08g005490.3C;	YES		YES	YES
Misugi	A08	21227002	21227498	Hypo	Upstream	1780	CHH	ID=BraA08g031720.3C;	YES
Misugi	A05	22973507	22973958	Hypo	Downstream	1854	CHH	ID=BraA05g031360.3C;	YES
Misugi	A05	8257161	8257500	Hypo	Upstream	1902	CHH	ID=BraA05g014520.3C;	YES
Misugi	A09	3513501	3514000	Hyper	Downstream	1979	CHH	ID=BraA09g006010.3C;
Misugi	A02	9181504	9182000	Hyper			CHH		YES
Misugi	A02	19065002	19065499	Hypo			CHH		YES			YES
Misugi	A02	19794505	19794996	Hyper			CHH		YES
Misugi	A02	22277503	22277995	Hyper			CHH		YES			YES
Misugi	A03	19569502	19570000	Hyper			CHH
Misugi	A03	19884010	19884500	Hypo			CHH
Misugi	A03	25540002	25540497	Hypo			CHH		YES
Misugi	A03	32577001	32577500	Hyper			CHH		YES
Misugi	A04	3269501	3269999	Hyper			CHH		YES
Misugi	A04	6411513	6411998	Hyper			CHH					YES
Misugi	A04	13962503	13962999	Hyper			CHH
Misugi	A05	10088501	10089000	Hyper			CHH		YES
Misugi	A05	10792505	10792998	Hyper			CHH
Misugi	A05	13508006	13508499	Hyper			CHH		YES			YES
Misugi	A05	13848001	13848496	Hyper			CHH		YES			YES
Misugi	A05	22083502	22083999	Hyper			CHH
Misugi	A05	25089501	25089999	Hyper			CHH
Misugi	A06	2548001	2548446	Hyper			CHH		YES
Misugi	A06	6245501	6245999	Hypo			CHH		YES
Misugi	A06	12379520	12380000	Hyper			CHH		YES			YES
Misugi	A06	13140501	13140992	Hypo			CHH		YES			YES
Misugi	A06	16986502	16986995	Hyper			CHH		YES			YES
Misugi	A06	17701003	17701498	Hypo			CHH
Misugi	A06	25948002	25948500	Hyper			CHH		YES
Misugi	A07	1893003	1893459	Hypo			CHH					YES
Misugi	A07	4554016	4554499	Hypo			CHH					YES
Misugi	A07	11933504	11933996	Hyper			CHH		YES
Misugi	A08	990001	990500	Hypo			CHH		YES
Misugi	A09	7587008	7587500	Hyper			CHH
Misugi	A09	11072501	11072996	Hyper			CHH
Misugi	A09	12060002	12060500	Hyper			CHH		YES
Misugi	A09	14495001	14495498	Hyper			CHH		YES
Misugi	A09	21855013	21855495	Hyper			CHH		YES			YES
Misugi	A09	27742501	27743000	Hyper			CHH		YES			YES
Misugi	A09	29034004	29034498	Hyper			CHH		YES			YES
Misugi	A09	35839002	35839498	Hypo			CHH
Misugi	A09	37480508	37480999	Hyper			CHH		YES
Misugi	A09	38714002	38714500	Hyper			CHH
Misugi	A10	14808002	14808499	Hyper			CHH
Nanane	A02	8310501	8310991	Hypo	Gene body	0	CG	ID=BraA02g015730.3C;	YES
Nanane	A02	9422502	9423000	Hypo	Gene body	0	CG	ID=BraA02g017260.3C;
Nanane	A02	22008004	22008499	Hyper	Gene body	0	CG	ID=BraA02g032040.3C;				YES
Nanane	A03	7776502	7776998	Hypo	Gene body	0	CG	ID=BraA03g016760.3C;
Nanane	A03	7780004	7780500	Hyper	Gene body	0	CG	ID=BraA03g016780.3C;
Nanane	A03	8330502	8331000	Hypo	Gene body	0	CG	ID=BraA03g017910.3C;
Nanane	A03	8342501	8343000	Hyper	Gene body	0	CG	ID=BraA03g017930.3C;
Nanane	A03	14916501	14916999	Hyper	Gene body	0	CG	ID=BraA03g029640.3C;
Nanane	A03	15996506	15997000	Hyper	Gene body	0	CG	ID=BraA03g032260.3C;
Nanane	A03	17092508	17093000	Hyper	Gene body	0	CG	ID=BraA03g034600.3C;
Nanane	A04	11439002	11439499	Hypo	Gene body	0	CG	ID=BraA04g014860.3C;
Nanane	A04	15951503	15951999	Hyper	Gene body	0	CG	ID=BraA04g021290.3C;
Nanane	A06	23088005	23088500	Hyper	Gene body	0	CG	ID=BraA06g033830.3C;
Nanane	A07	24370501	24370998	Hyper	Gene body	0	CG	ID=BraA07g034250.3C;
Nanane	A08	4398007	4398500	Hypo	Gene body	0	CG	ID=BraA08g005590.3C;	YES			YES
Nanane	A08	22766505	22766995	Hyper	Gene body	0	CG	ID=BraA08g035470.3C;
Nanane	A10	1292004	1292499	Hypo	Gene body	0	CG	ID=BraA10g002520.3C;
Nanane	A03	12369501	12369998	Hypo	Upstream	75	CG	ID=BraA03g025100.3C;	YES
Nanane	A03	21830005	21830497	Hyper	Downstream	167	CG	ID=BraA03g043330.3C;
Nanane	A06	14357504	14357948	Hyper	Upstream	644	CG	ID=BraA06g022550.3C;				YES
Nanane	A01	9928002	9928500	Hypo	Upstream	684	CG	ID=BraA01g018650.3C;
Nanane	A05	1440503	1440823	Hypo	Upstream	765	CG	ID=BraA05g002570.3C;
Nanane	A03	23767507	23768000	Hypo	Upstream	901	CG	ID=BraA03g047050.3C;		RLK
Nanane	A04	11293504	11293997	Hyper	Upstream	1043	CG	ID=BraA04g014550.3C;
Nanane	A02	31215507	31215998	Hypo	Upstream	1048	CG	ID=BraA02g045490.3C;	YES
Nanane	A09	9509003	9509498	Hyper	Upstream	1493	CG	ID=BraA09g015810.3C;	YES
Nanane	A01	9928002	9928500	Hypo	Downstream	1554	CG	ID=BraA01g018640.3C;
Nanane	A03	23767507	23768000	Hypo	Downstream	1560	CG	ID=BraA03g047040.3C;
Nanane	A02	31215507	31215998	Hypo	Downstream	1936	CG	ID=BraA02g045480.3C;	YES
Nanane	A09	14696531	14696999	Hypo			CG		YES
Nanane	A10	4490001	4490496	Hypo			CG
Nanane	A01	17196503	17196998	Hyper	Gene body	0	CHG	ID=BraA01g026900.3C;				YES
Nanane	A01	24625004	24625498	Hyper	Gene body	0	CHG	ID=BraA01g036000.3C;	YES
Nanane	A02	25206003	25206495	Hyper	Gene body	0	CHG	ID=BraA02g036240.3C;	YES
Nanane	A02	27128010	27128499	Hyper	Gene body	0	CHG	ID=BraA02g039020.3C;				YES
Nanane	A03	29836001	29836500	Hyper	Gene body	0	CHG	ID=BraA03g056880.3C;	YES
Nanane	A03	37633501	37633999	Hyper	Gene body	0	CHG	ID=BraA03g065230.3C;				YES
Nanane	A05	22722501	22722999	Hyper	Gene body	0	CHG	ID=BraA05g030950.3C;	YES
Nanane	A06	9399001	9399500	Hyper	Gene body	0	CHG	ID=BraA06g017040.3C;
Nanane	A06	15135507	15136000	Hyper	Gene body	0	CHG	ID=BraA06g022920.3C;				YES
Nanane	A06	27486503	27487000	Hypo	Gene body	0	CHG	ID=BraA06g041750.3C;
Nanane	A08	7648501	7649000	Hypo	Gene body	0	CHG	ID=BraA08g008640.3C;				YES
Nanane	A09	16391004	16391484	Hyper	Gene body	0	CHG	ID=BraA09g024430.3C;
Nanane	A09	17053502	17053997	Hyper	Gene body	0	CHG	ID=BraA09g025370.3C;	YES			YES
Nanane	A09	33581001	33581500	Hyper	Gene body	0	CHG	ID=BraA09g043510.3C;	YES
Nanane	A09	38663502	38664000	Hyper	Gene body	0	CHG	ID=BraA09g053250.3C;	YES
Nanane	A10	6567501	6567995	Hyper	Gene body	0	CHG	ID=BraA10g008790.3C;				YES
Nanane	A09	6038502	6039000	Hyper	Gene body	32	CHG	ID=BraA09g010450.3C;
Nanane	A06	16618502	16618998	Hyper	Downstream	38	CHG	ID=BraA06g024130.3C;	YES			YES
Nanane	A09	6038502	6039000	Hyper	Gene body	44	CHG	ID=BraA09g010440.3C;			YES
Nanane	A10	6026001	6026494	Hyper	Downstream	45	CHG	ID=BraA10g008450.3C;				YES
Nanane	A10	18219002	18219500	Hypo	Downstream	90	CHG	ID=BraA10g027930.3C;
Nanane	A09	24463512	24463999	Hypo	Upstream	92	CHG	ID=BraA09g031560.3C;	YES
Nanane	A02	5784004	5784359	Hypo	Upstream	138	CHG	ID=BraA02g012010.3C;	YES
Nanane	A10	19246501	19246999	Hypo	Downstream	208	CHG	ID=BraA10g030460.3C;
Nanane	A01	28672004	28672496	Hyper	Upstream	214	CHG	ID=BraA01g043090.3C;
Nanane	A10	4174001	4174480	Hyper	Downstream	218	CHG	ID=BraA10g007100.3C;				YES
Nanane	A03	32366001	32366482	Hyper	Downstream	282	CHG	ID=BraA03g060740.3C;	YES
Nanane	A01	22720502	22720995	Hyper	Downstream	303	CHG	ID=BraA01g033190.3C;
Nanane	A03	3426504	3426996	Hyper	Downstream	312	CHG	ID=BraA03g007980.3C;			YES
Nanane	A05	5257002	5257500	Hypo	Downstream	376	CHG	ID=BraA05g009860.3C;	YES
Nanane	A02	5784004	5784359	Hypo	Downstream	400	CHG	ID=BraA02g012000.3C;	YES
Nanane	A10	6026001	6026494	Hyper	Upstream	418	CHG	ID=BraA10g008470.3C;				YES
Nanane	A01	6942502	6942997	Hypo	Upstream	512	CHG	ID=BraA01g013260.3C;
Nanane	A08	10625501	10625992	Hyper	Upstream	596	CHG	ID=BraA08g012250.3C;			YES
Nanane	A09	31059506	31060000	Hypo	Downstream	627	CHG	ID=BraA09g039720.3C;
Nanane	A06	14470004	14470500	Hyper	Downstream	651	CHG	ID=BraA06g022580.3C;	YES			YES
Nanane	A01	14618005	14618498	Hypo	Downstream	665	CHG	ID=BraA01g024930.3C;	YES			YES
Nanane	A03	21491001	21491494	Hypo	Upstream	697	CHG	ID=BraA03g042770.3C;
Nanane	A09	22492503	22492999	Hyper	Downstream	700	CHG	ID=BraA09g030290.3C;	YES			YES
Nanane	A02	5389003	5389496	Hyper	Downstream	704	CHG	ID=BraA02g011050.3C;	YES
Nanane	A06	16618502	16618998	Hyper	Upstream	722	CHG	ID=BraA06g024140.3C;	YES			YES
Nanane	A06	29119502	29119995	Hyper	Downstream	735	CHG	ID=BraA06g044890.3C;
Nanane	A01	16776503	16777000	Hyper	Downstream	749	CHG	ID=BraA01g026670.3C;	YES			YES
Nanane	A05	24244502	24244994	Hyper	Upstream	757	CHG	ID=BraA05g033780.3C;	YES
Nanane	A10	18219002	18219500	Hypo	Upstream	760	CHG	ID=BraA10g027940.3C;
Nanane	A06	29119502	29119995	Hyper	Upstream	774	CHG	ID=BraA06g044900.3C;
Nanane	A01	1947001	1947483	Hyper	Downstream	836	CHG	ID=BraA01g003990.3C;	YES
Nanane	A06	6634501	6634998	Hyper	Upstream	838	CHG	ID=BraA06g012470.3C;	YES
Nanane	A03	4770003	4770500	Hypo	Upstream	877	CHG	ID=BraA03g011050.3C;	YES
Nanane	A01	27466505	27466998	Hyper	Upstream	907	CHG	ID=BraA01g040840.3C;
Nanane	A05	5283012	5283492	Hyper	Upstream	907	CHG	ID=BraA05g009920.3C;	YES
Nanane	A03	35913004	35913500	Hypo	Downstream	964	CHG	ID=BraA03g063370.3C;				YES
Nanane	A06	17751501	17751996	Hyper	Upstream	967	CHG	ID=BraA06g025440.3C;
Nanane	A08	7468502	7469000	Hyper	Upstream	1103	CHG	ID=BraA08g008450.3C;	YES			YES
Nanane	A10	19246501	19246999	Hypo	Upstream	1248	CHG	ID=BraA10g030470.3C;
Nanane	A03	24880501	24881000	Hyper	Upstream	1341	CHG	ID=BraA03g048900.3C;	YES
Nanane	A05	20548504	20548999	Hyper	Upstream	1347	CHG	ID=BraA05g027400.3C;	YES
Nanane	A01	14964006	14964500	Hyper	Downstream	1348	CHG	ID=BraA01g025300.3C;
Nanane	A07	13686505	13686996	Hypo	Downstream	1370	CHG	ID=BraA07g015150.3C;	YES
Nanane	A09	15213501	15214000	Hypo	Downstream	1375	CHG	ID=BraA09g023020.3C;
Nanane	A09	22729003	22729495	Hyper	Upstream	1387	CHG	ID=BraA09g030360.3C;				YES
Nanane	A03	32532511	32532986	Hypo	Downstream	1438	CHG	ID=BraA03g060930.3C;
Nanane	A01	3398502	3398973	Hypo	Downstream	1442	CHG	ID=BraA01g007120.3C;			YES
Nanane	A02	16865506	16865995	Hyper	Upstream	1485	CHG	ID=BraA02g027560.3C;	YES			YES
Nanane	A08	7468502	7469000	Hyper	Downstream	1564	CHG	ID=BraA08g008440.3C;	YES			YES
Nanane	A05	5547016	5547498	Hyper	Downstream	1692	CHG	ID=BraA05g010380.3C;
Nanane	A09	25693002	25693498	Hyper	Downstream	1692	CHG	ID=BraA09g033040.3C;				YES
Nanane	A01	19851002	19851498	Hyper	Downstream	1727	CHG	ID=BraA01g029720.3C;	YES
Nanane	A03	24257501	24257986	Hypo	Downstream	1756	CHG	ID=BraA03g047960.3C;
Nanane	A03	32366001	32366482	Hyper	Upstream	1770	CHG	ID=BraA03g060750.3C;	YES
Nanane	A06	2240005	2240362	Hypo	Upstream	1924	CHG	ID=BraA06g003760.3C;	YES
Nanane	A10	1076001	1076500	Hyper	Upstream	1942	CHG	ID=BraA10g002090.3C;	YES	RLK
Nanane	A01	4666501	4666999	Hyper			CHG		YES
Nanane	A01	12451504	12451996	Hypo			CHG		YES
Nanane	A01	13912502	13912998	Hyper			CHG		YES			YES
Nanane	A01	15443501	15443997	Hyper			CHG		YES			YES
Nanane	A01	15600002	15600498	Hyper			CHG		YES			YES
Nanane	A01	16809001	16809500	Hyper			CHG					YES
Nanane	A01	17334002	17334498	Hyper			CHG		YES			YES
Nanane	A01	17380501	17380997	Hyper			CHG		YES			YES
Nanane	A01	17388001	17388499	Hypo			CHG		YES			YES
Nanane	A01	20493001	20493500	Hyper			CHG		YES			YES
Nanane	A01	20670003	20670497	Hyper			CHG		YES
Nanane	A01	20962004	20962499	Hyper			CHG
Nanane	A02	2275146	2275498	Hypo			CHG		YES
Nanane	A02	11464506	11464998	Hyper			CHG
Nanane	A02	12182008	12182499	Hypo			CHG
Nanane	A02	13384501	13385000	Hyper			CHG		YES
Nanane	A02	19442001	19442499	Hyper			CHG					YES
Nanane	A02	21527501	21527998	Hyper			CHG		YES
Nanane	A02	26665005	26665499	Hypo			CHG		YES
Nanane	A02	29042504	29042997	Hyper			CHG
Nanane	A03	13900003	13900500	Hypo			CHG		YES
Nanane	A03	19571007	19571414	Hyper			CHG		YES
Nanane	A03	33830005	33830498	Hyper			CHG					YES
Nanane	A03	35343001	35343500	Hyper			CHG					YES
Nanane	A03	35513001	35513500	Hyper			CHG					YES
Nanane	A03	35957001	35957499	Hypo			CHG		YES			YES
Nanane	A03	36487501	36488000	Hyper			CHG					YES
Nanane	A03	36921501	36922000	Hyper			CHG		YES			YES
Nanane	A03	37026004	37026499	Hyper			CHG					YES
Nanane	A04	4539501	4539998	Hyper			CHG					YES
Nanane	A04	6622002	6622498	Hyper			CHG		YES			YES
Nanane	A04	7416002	7416498	Hypo			CHG		YES			YES
Nanane	A04	9171001	9171497	Hyper			CHG		YES			YES
Nanane	A04	14921505	14921996	Hyper			CHG
Nanane	A04	20869003	20869498	Hyper			CHG
Nanane	A05	9327002	9327499	Hyper			CHG		YES
Nanane	A05	13719503	13719996	Hyper			CHG					YES
Nanane	A06	10432501	10432996	Hyper			CHG		YES
Nanane	A06	13901504	13902000	Hyper			CHG					YES
Nanane	A06	14412501	14413000	Hyper			CHG		YES			YES
Nanane	A06	15185502	15185999	Hyper			CHG		YES			YES
Nanane	A06	15978002	15978500	Hyper			CHG		YES			YES
Nanane	A06	16563006	16563500	Hyper			CHG		YES			YES
Nanane	A07	7544008	7544499	Hyper			CHG		YES			YES
Nanane	A07	8776501	8776996	Hyper			CHG		YES
Nanane	A07	8838501	8839000	Hyper			CHG		YES
Nanane	A07	10581003	10581500	Hypo			CHG		YES
Nanane	A07	11662523	11663000	Hypo			CHG
Nanane	A07	19902505	19902999	Hyper			CHG
Nanane	A08	3625502	3625997	Hyper			CHG		YES
Nanane	A08	3774003	3774498	Hyper			CHG		YES
Nanane	A08	4230501	4230996	Hypo			CHG		YES			YES
Nanane	A08	5247502	5247998	Hyper			CHG					YES
Nanane	A08	7450001	7450500	Hyper			CHG		YES			YES
Nanane	A09	9693002	9693500	Hyper			CHG
Nanane	A09	11227504	11227999	Hypo			CHG
Nanane	A09	17085018	17085498	Hyper			CHG		YES			YES
Nanane	A09	18067003	18067500	Hyper			CHG		YES
Nanane	A09	19146503	19146999	Hyper			CHG
Nanane	A09	20403501	20404000	Hyper			CHG					YES
Nanane	A09	20544505	20544998	Hyper			CHG		YES			YES
Nanane	A09	22407001	22407497	Hyper			CHG		YES			YES
Nanane	A09	24180005	24180500	Hyper			CHG					YES
Nanane	A09	24611015	24611491	Hyper			CHG		YES
Nanane	A09	35369501	35369998	Hypo			CHG		YES
Nanane	A10	4562003	4562500	Hyper			CHG		YES			YES
Nanane	A01	5758502	5758996	Hypo	Gene body	0	CHH	ID=BraA01g011060.3C;
Nanane	A03	29212001	29212465	Hyper	Gene body	0	CHH	ID=BraA03g055800.3C;	YES
Nanane	A04	8552503	8552998	Hypo	Gene body	0	CHH	ID=BraA04g010770.3C;
Nanane	A04	14772002	14772498	Hyper	Gene body	0	CHH	ID=BraA04g019570.3C;	YES
Nanane	A05	6982501	6982998	Hyper	Gene body	0	CHH	ID=BraA05g012830.3C;
Nanane	A05	9200002	9200497	Hyper	Gene body	0	CHH	ID=BraA05g015700.3C;	YES			YES
Nanane	A06	1544001	1544500	Hyper	Gene body	0	CHH	ID=BraA06g002540.3C;	YES
Nanane	A06	9399001	9399500	Hyper	Gene body	0	CHH	ID=BraA06g017040.3C;
Nanane	A06	11861501	11862000	Hyper	Gene body	0	CHH	ID=BraA06g020490.3C;	YES
Nanane	A07	11564003	11564500	Hyper	Gene body	0	CHH	ID=BraA07g011850.3C;	YES
Nanane	A07	14634506	14635000	Hyper	Gene body	0	CHH	ID=BraA07g016710.3C;
Nanane	A07	15435505	15436000	Hypo	Gene body	0	CHH	ID=BraA07g018030.3C;
Nanane	A08	15806503	15806997	Hyper	Gene body	0	CHH	ID=BraA08g020640.3C;
Nanane	A09	15156504	15157000	Hypo	Gene body	0	CHH	ID=BraA09g022950.3C;
Nanane	A10	9636510	9636998	Hyper	Gene body	0	CHH	ID=BraA10g011710.3C;	YES			YES
Nanane	A10	13601501	13602000	Hypo	Gene body	0	CHH	ID=BraA10g018370.3C;
Nanane	A09	38260003	38260499	Hypo	Upstream	20	CHH	ID=BraA09g052380.3C;
Nanane	A06	9772007	9772500	Hyper	Downstream	44	CHH	ID=BraA06g017670.3C;
Nanane	A07	7736001	7736498	Hypo	Downstream	143	CHH	ID=BraA07g007540.3C;
Nanane	A02	10066002	10066499	Hyper	Upstream	148	CHH	ID=BraA02g018120.3C;
Nanane	A05	15734001	15734499	Hypo	Upstream	165	CHH	ID=BraA05g021990.3C;				YES
Nanane	A07	15243502	15243994	Hypo	Downstream	171	CHH	ID=BraA07g017770.3C;	YES
Nanane	A08	15249002	15249499	Hypo	Downstream	245	CHH	ID=BraA08g019740.3C;	YES
Nanane	A01	18114505	18114998	Hyper	Downstream	328	CHH	ID=BraA01g027890.3C;
Nanane	A05	14389014	14389489	Hyper	Upstream	342	CHH	ID=BraA05g021070.3C;				YES
Nanane	A02	13320502	13320998	Hypo	Upstream	364	CHH	ID=BraA02g022770.3C;
Nanane	A10	5094502	5094998	Hyper	Downstream	369	CHH	ID=BraA10g007740.3C;	YES			YES
Nanane	A06	21935501	21936000	Hyper	Downstream	375	CHH	ID=BraA06g031890.3C;
Nanane	A03	37476024	37476496	Hyper	Upstream	380	CHH	ID=BraA03g065010.3C;	YES			YES
Nanane	A02	4153001	4153495	Hypo	Upstream	420	CHH	ID=BraA02g008820.3C;
Nanane	A01	10401014	10401500	Hypo	Upstream	422	CHH	ID=BraA01g019480.3C;
Nanane	A08	15433001	15433500	Hyper	Upstream	431	CHH	ID=BraA08g020120.3C;
Nanane	A08	16911008	16911496	Hypo	Upstream	477	CHH	ID=BraA08g022600.3C;
Nanane	A02	13341001	13341483	Hypo	Upstream	493	CHH	ID=BraA02g022800.3C;
Nanane	A09	17646001	17646485	Hypo	Upstream	524	CHH	ID=BraA09g026260.3C;	YES
Nanane	A10	13710502	13710999	Hypo	Downstream	553	CHH	ID=BraA10g018490.3C;
Nanane	A06	16596003	16596499	Hypo	Downstream	577	CHH	ID=BraA06g024090.3C;				YES
Nanane	A08	3502503	3502982	Hypo	Downstream	616	CHH	ID=BraA08g004760.3C;
Nanane	A01	14618005	14618498	Hypo	Downstream	665	CHH	ID=BraA01g024930.3C;	YES			YES
Nanane	A05	14389014	14389489	Hyper	Downstream	707	CHH	ID=BraA05g021060.3C;				YES
Nanane	A10	12254502	12255000	Hypo	Upstream	726	CHH	ID=BraA10g015690.3C;	YES
Nanane	A02	27037002	27037498	Hyper	Downstream	765	CHH	ID=BraA02g038960.3C;				YES
Nanane	A09	9856001	9856500	Hyper	Downstream	771	CHH	ID=BraA09g016150.3C;				YES
Nanane	A05	22007504	22008000	Hypo	Downstream	817	CHH	ID=BraA05g029880.3C;
Nanane	A10	2661002	2661497	Hyper	Upstream	826	CHH	ID=BraA10g004980.3C;	YES
Nanane	A03	17698503	17698998	Hypo	Upstream	830	CHH	ID=BraA03g035870.3C;
Nanane	A09	14039502	14040000	Hyper	Downstream	848	CHH	ID=BraA09g021520.3C;	YES
Nanane	A05	19051505	19051997	Hypo	Upstream	872	CHH	ID=BraA05g025340.3C;	YES
Nanane	A03	22086008	22086500	Hypo	Downstream	946	CHH	ID=BraA03g043730.3C;	YES
Nanane	A02	28567506	28568000	Hyper	Upstream	949	CHH	ID=BraA02g041150.3C;
Nanane	A02	19519002	19519499	Hyper	Downstream	978	CHH	ID=BraA02g029630.3C;				YES
Nanane	A07	13696501	13696999	Hypo	Upstream	995	CHH	ID=BraA07g015170.3C;	YES		YES
Nanane	A01	28980501	28980994	Hypo	Downstream	1016	CHH	ID=BraA01g043740.3C;	YES
Nanane	A02	10066002	10066499	Hyper	Downstream	1024	CHH	ID=BraA02g018110.3C;
Nanane	A10	2661002	2661497	Hyper	Downstream	1136	CHH	ID=BraA10g004970.3C;	YES
Nanane	A08	16911008	16911496	Hypo	Downstream	1184	CHH	ID=BraA08g022590.3C;
Nanane	A09	39923501	39923999	Hyper	Upstream	1192	CHH	ID=BraA09g055350.3C;	YES
Nanane	A09	8552002	8552497	Hypo	Upstream	1215	CHH	ID=BraA09g014660.3C;	YES
Nanane	A08	15249002	15249499	Hypo	Upstream	1239	CHH	ID=BraA08g019750.3C;	YES
Nanane	A03	27049647	27050000	Hypo	Upstream	1240	CHH	ID=BraA03g052340.3C;
Nanane	A02	28567506	28568000	Hyper	Downstream	1281	CHH	ID=BraA02g041140.3C;
Nanane	A07	13782001	13782496	Hyper	Downstream	1336	CHH	ID=BraA07g015300.3C;	YES
Nanane	A03	32729004	32729496	Hypo	Upstream	1464	CHH	ID=BraA03g061140.3C;	YES
Nanane	A03	17698503	17698998	Hypo	Downstream	1516	CHH	ID=BraA03g035860.3C;
Nanane	A09	13197001	13197497	Hyper	Downstream	1522	CHH	ID=BraA09g020370.3C;	YES
Nanane	A08	15433001	15433500	Hyper	Downstream	1567	CHH	ID=BraA08g020110.3C;
Nanane	A02	24325512	24326000	Hyper	Upstream	1639	CHH	ID=BraA02g035150.3C;
Nanane	A06	28126003	28126500	Hyper	Downstream	1672	CHH	ID=BraA06g042950.3C;
Nanane	A08	2003	2490	Hypo	Upstream	1704	CHH	ID=BraA08g000010.3C;
Nanane	A03	19327502	19327996	Hypo	Upstream	1710	CHH	ID=BraA03g039060.3C;
Nanane	A06	14890503	14890995	Hyper	Upstream	1716	CHH	ID=BraA06g022770.3C;	YES			YES
Nanane	A05	22007504	22008000	Hypo	Upstream	1744	CHH	ID=BraA05g029890.3C;
Nanane	A09	44023004	44023499	Hypo	Upstream	1751	CHH	ID=BraA09g063950.3C;
Nanane	A03	24257501	24257986	Hypo	Downstream	1756	CHH	ID=BraA03g047960.3C;
Nanane	A05	10940003	10940498	Hyper	Upstream	1778	CHH	ID=BraA05g017930.3C;	YES
Nanane	A06	28126003	28126500	Hyper	Upstream	1791	CHH	ID=BraA06g042960.3C;
Nanane	A01	28980501	28980994	Hypo	Upstream	1817	CHH	ID=BraA01g043750.3C;	YES
Nanane	A01	2210503	2210999	Hyper			CHH		YES
Nanane	A01	2649084	2649500	Hyper			CHH
Nanane	A01	12126512	12127000	Hypo			CHH		YES
Nanane	A01	14021502	14022000	Hypo			CHH					YES
Nanane	A01	23815510	23815989	Hypo			CHH
Nanane	A02	14086003	14086449	Hyper			CHH
Nanane	A02	17565511	17565999	Hyper			CHH		YES
Nanane	A02	17637501	17637996	Hyper			CHH		YES
Nanane	A02	18553003	18553500	Hyper			CHH					YES
Nanane	A02	21283507	21283999	Hypo			CHH
Nanane	A03	27374504	27374999	Hyper			CHH		YES
Nanane	A03	29077501	29077999	Hyper			CHH
Nanane	A03	36431501	36431999	Hypo			CHH					YES
Nanane	A04	4679001	4679499	Hyper			CHH
Nanane	A04	5779505	5780000	Hypo			CHH		YES
Nanane	A04	6455004	6455485	Hypo			CHH					YES
Nanane	A04	7646501	7647000	Hypo			CHH		YES			YES
Nanane	A04	13918505	13918998	Hyper			CHH		YES
Nanane	A05	5456008	5456498	Hypo			CHH
Nanane	A05	8229316	8229500	Hypo			CHH		YES
Nanane	A05	14882006	14882499	Hyper			CHH		YES			YES
Nanane	A05	15957501	15957997	Hyper			CHH					YES
Nanane	A06	10874003	10874499	Hypo			CHH
Nanane	A06	14395502	14396000	Hyper			CHH					YES
Nanane	A06	21037138	21037499	Hyper			CHH		YES
Nanane	A06	22795502	22796000	Hyper			CHH		YES
Nanane	A07	7014502	7014997	Hyper			CHH		YES			YES
Nanane	A07	9367502	9367998	Hypo			CHH
Nanane	A07	14666501	14666998	Hypo			CHH		YES
Nanane	A07	14913001	14913499	Hyper			CHH		YES
Nanane	A07	19094004	19094499	Hypo			CHH
Nanane	A07	19308501	19309000	Hypo			CHH		YES
Nanane	A07	21295505	21296000	Hyper			CHH
Nanane	A08	2616501	2617000	Hyper			CHH
Nanane	A08	3815017	3815500	Hyper			CHH					YES
Nanane	A08	4119001	4119498	Hyper			CHH		YES			YES
Nanane	A08	4243001	4243500	Hypo			CHH		YES			YES
Nanane	A08	6257625	6257997	Hyper			CHH
Nanane	A08	7641501	7642000	Hypo			CHH					YES
Nanane	A08	12897003	12897476	Hyper			CHH
Nanane	A08	21105503	21105974	Hyper			CHH		YES
Nanane	A09	9610502	9611000	Hyper			CHH
Nanane	A09	15143004	15143500	Hyper			CHH
Nanane	A09	21763501	21763999	Hyper			CHH		YES			YES
Nanane	A09	22268504	22268992	Hyper			CHH		YES			YES
Nanane	A09	23727003	23727493	Hypo			CHH		YES			YES
Nanane	A09	26086133	26086498	Hypo			CHH		YES
Nanane	A09	28483502	28483991	Hyper			CHH
Nanane	A09	31614009	31614500	Hypo			CHH
Nanane	A09	33809503	33809999	Hyper			CHH
Nanane	A09	35369501	35369998	Hypo			CHH		YES
Nanane	A10	8151507	8152000	Hypo			CHH					YES
Hyper, hyper-methylated; Hypo, hypo-methylated
RLK, receptor-like kinases
aYES indicates DMR-associated transposable elements (TEs)
bYES indicates DMR-associated and differentially expressed genes
cYES indicates heterochromatic regions (TE density > 0.4)

## Sheet: Table S4
Supplementary Table S4. Funtional analysis of genes associated with DMRs
Cultivar	GO.ID_BP*	GO.ID_CC*	GO.ID_MF*
Misugi	GO:0015074	GO:0005576	GO:0004190
Misugi	GO:0006278	GO:0061927	GO:0003964
Misugi	GO:0010102	GO:0009707	GO:0003676
Misugi	GO:0006629	GO:0033116	GO:0102966
Misugi	GO:0019432	GO:0031225	GO:0047196
Misugi	GO:0006508	GO:0099503	GO:0004144
Misugi	GO:0090305	GO:0030176	GO:0004519
Misugi	GO:0009807	GO:0005886	GO:0140078
Misugi	GO:0016254	GO:0070971	GO:0000702
Misugi	GO:0010305	GO:0000220	GO:0050062
Misugi	GO:0010025	GO:0019774	GO:0051377
Misugi	GO:0046901	GO:0009505	GO:0004326
Misugi	GO:1901599	GO:0005856	GO:0042349
Misugi	GO:0040009	GO:0005832	GO:0016985
Misugi	GO:0017006	GO:0009506	GO:0030976
Misugi	GO:0070084	GO:0005765	GO:0035197
Misugi	GO:0046825	GO:0048046	GO:0003860
Misugi	GO:0080056	GO:0030134	GO:0004930
Misugi	GO:0080057	GO:0031902	GO:0080019
Misugi	GO:0071585	GO:0019898	GO:0043024
Misugi	GO:0035336	GO:0022627	GO:0070006
Misugi	GO:0080155	GO:0030659	GO:0008270
Misugi	GO:0046654	GO:0005819	GO:0005227
Misugi	GO:0060866	GO:0005759	GO:0005089
Misugi	GO:0019941	GO:0005774	GO:0031386
Misugi	GO:0098586	GO:0005829	GO:0008083
Misugi	GO:0046739	GO:0005737	GO:0010329
Misugi	GO:0000209	GO:0030173	GO:0045544
Misugi	GO:0007275	GO:0005789	GO:0005049
Misugi	GO:0006574	GO:0016021	GO:0102965
Nanane	GO:0031111	GO:0000932	GO:0015292
Nanane	GO:0090378	GO:0031380	GO:0042626
Nanane	GO:0010027	GO:1990246	GO:0003677
Nanane	GO:0071280	GO:0005881	GO:0043325
Nanane	GO:0007369	GO:0070505	GO:0015928
Nanane	GO:0006499	GO:0005663	GO:0016463
Nanane	GO:0051511	GO:0010598	GO:0010177
Nanane	GO:1902477	GO:0071458	GO:0003968
Nanane	GO:0042754	GO:0000815	GO:0080025
Nanane	GO:0070898	GO:1990023	GO:0005547
Nanane	GO:0035865	GO:0009501	GO:0016984
Nanane	GO:0010528	GO:0005750	GO:0008506
Nanane	GO:0006627	GO:0009574	GO:0080150
Nanane	GO:0010366	GO:0071782	GO:0016621
Nanane	GO:0001172	GO:0008540	GO:0052624
Nanane	GO:0046345	GO:0009535	GO:0005516
Nanane	GO:0071786	GO:0000922	GO:0017112
Nanane	GO:0080009	GO:0016607	GO:0003689
Nanane	GO:1901141	GO:0000776	GO:0070628
Nanane	GO:0036444	GO:0012505	GO:0070180
Nanane	GO:1900458	GO:0031305	GO:0015086
Nanane	GO:0034051	GO:0005771	GO:0004708
Nanane	GO:0045899	GO:0000502	GO:0003700
Nanane	GO:0015937	GO:0055028	GO:0004197
Nanane	GO:1901656	GO:0031597	GO:0004351
Nanane	GO:0090602	GO:0042170	GO:0016629
Nanane	GO:0071281	GO:0017087	GO:0070577
Nanane	GO:0075733	GO:0031501	GO:0000995
Nanane	GO:0010220	GO:0000126	GO:0003680
Nanane	GO:0072708	GO:0010494	GO:0016711
Top 30 of gene ontology (GO) class of genes associated with differentially methylated regions (DMRs) between control leaves and leaves infected with Albugo candida
BP, Biological Process; CC, Cellular Component; MF, Molecular function

## Sheet: Table S5
Supplementary Table S5. Types of Differentially methylated region (DMR)-associated Transposable elements (TEs)
Cultivar	Chromosome	DMR Type	DMR Start	DMR End	TE_Name
Misugi	A05	CG	16210010	16210500	SIMPLEGUY1
Misugi	A10	CG	9661501	9661999	BRENSPM1
Misugi	A01	CHG	12700504	12700999	Gypsy-44_BRa-LTR
Misugi	A01	CHG	14052001	14052498	Gypsy-42_BRa-LTR
Misugi	A01	CHG	14508001	14508499	ATHATN6
Misugi	A01	CHG	15203003	15203500	Gypsy-44_BRa-I
Misugi	A01	CHG	15614001	15614500	Gypsy-44_BRa-LTR
Misugi	A01	CHG	15614001	15614500	Gypsy-44_BRa-I
Misugi	A01	CHG	15849505	15850000	Gypsy-2_BRa-I
Misugi	A02	CHG	18672003	18672500	Gypsy-42_BRa-I
Misugi	A02	CHG	18952003	18952499	hAT-N3_SSa
Misugi	A02	CHG	19364502	19365000	Gypsy-44_BRa-I
Misugi	A02	CHG	19537502	19538000	Gypsy-42_BRa-LTR
Misugi	A02	CHG	19740505	19741000	Copia-7_BRa-I
Misugi	A02	CHG	19858003	19858500	Vandal3
Misugi	A02	CHG	20024003	20024492	Gypsy-42_BRa-I
Misugi	A02	CHG	21695501	21696000	Copia-100_BRa-LTR
Misugi	A02	CHG	21695501	21696000	Copia-15_MN-I
Misugi	A02	CHG	25549501	25549996	TAG3N1
Misugi	A03	CHG	8153506	8153998	HARB-3_ALy
Misugi	A03	CHG	21481001	21481498	Copia-11_ALY-LTR
Misugi	A03	CHG	32453501	32453999	L1-2_BRa
Misugi	A03	CHG	33855001	33855500	Gypsy-42_BRa-LTR
Misugi	A03	CHG	35085512	35085998	Gypsy-44_BRa-I
Misugi	A03	CHG	36905502	36905999	Gypsy-42_BRa-I
Misugi	A03	CHG	37285001	37285498	BRENSPM1
Misugi	A03	CHG	37342501	37343000	Gypsy-42_BRa-LTR
Misugi	A03	CHG	37342501	37343000	Gypsy-42_BRa-I
Misugi	A04	CHG	2365501	2366000	ATLINE1_9
Misugi	A04	CHG	2367502	2368000	ATLINE1_8
Misugi	A04	CHG	3268016	3268497	SIMPLEGUY1
Misugi	A04	CHG	5512501	5512996	Copia-22_JC-I
Misugi	A04	CHG	7084502	7085000	Gypsy-44_BRa-LTR
Misugi	A04	CHG	9802503	9802998	Copia-82_BRa-I
Misugi	A04	CHG	19200508	19200998	Copia-60_BRa-I
Misugi	A05	CHG	734502	735000	DNA-6B_ALy
Misugi	A05	CHG	734502	735000	Gypsy-7_BRa-LTR
Misugi	A05	CHG	4996005	4996500	DNA-6B_ALy
Misugi	A05	CHG	8736004	8736496	Copia-60_BRa-I
Misugi	A05	CHG	11047510	11048000	Copia-91_BRa-I
Misugi	A05	CHG	11047510	11048000	Copia-91_BRa-LTR
Misugi	A05	CHG	14487003	14487497	Athila4C_I-int
Misugi	A05	CHG	15496014	15496498	HATN3_ALy
Misugi	A05	CHG	15496014	15496498	ATREP10A
Misugi	A05	CHG	15762501	15763000	AT10MU1
Misugi	A05	CHG	18118503	18119000	Copia-58_BRa-I
Misugi	A05	CHG	18118503	18119000	Gypsy-44_BRa-LTR
Misugi	A05	CHG	23410001	23410479	L1-13_ALy
Misugi	A06	CHG	4784001	4784499	Copia-14_EPa-I
Misugi	A06	CHG	12904001	12904497	L1-5_ALy
Misugi	A06	CHG	13392003	13392498	Gypsy-42_BRa-LTR
Misugi	A06	CHG	13960501	13961000	Gypsy-30_ALY-I
Misugi	A06	CHG	14119503	14120000	Gypsy-42_BRa-LTR
Misugi	A06	CHG	14144504	14145000	Gypsy-42_BRa-LTR
Misugi	A06	CHG	14293501	14293997	Gypsy-42_BRa-I
Misugi	A06	CHG	14458002	14458499	Gypsy-47_BRa-I
Misugi	A06	CHG	14478502	14478995	Gypsy-10_ALY-I
Misugi	A06	CHG	15920002	15920498	EnSpm-1_BRa
Misugi	A06	CHG	20512504	20513000	Copia-47_BRa-I
Misugi	A06	CHG	28474502	28474999	Gypsy-20_BRa-I
Misugi	A06	CHG	29048501	29048999	L1-15_ALy
Misugi	A07	CHG	7071002	7071500	Gypsy-44_BRa-LTR
Misugi	A07	CHG	7071002	7071500	Gypsy-44_BRa-I
Misugi	A08	CHG	1740001	1740498	HAT-N9_Mad
Misugi	A08	CHG	2147502	2148000	MuDR-5_ALy
Misugi	A09	CHG	3138001	3138498	RNA-U1_OS
Misugi	A09	CHG	10465524	10465995	TAG2
Misugi	A09	CHG	22310003	22310496	Gypsy-44_BRa-LTR
Misugi	A09	CHG	23187001	23187498	Gypsy-44_BRa-LTR
Misugi	A09	CHG	23187001	23187498	Gypsy-42_BRa-I
Misugi	A09	CHG	24034507	24034993	Gypsy-36_BRa-I
Misugi	A09	CHG	37265501	37266000	Gypsy-9_EPa-I
Misugi	A09	CHG	37265501	37266000	Gypsy-36_ALy-I
Misugi	A10	CHG	13244501	13244997	L1-15_ALy
Misugi	A10	CHG	14462503	14463000	Helitron-1_BRa
Misugi	A01	CHH	12996503	12996999	HARB-3_ALy
Misugi	A01	CHH	17638001	17638493	L1-2_BRa
Misugi	A01	CHH	18452501	18452998	Copia-91_BRa-I
Misugi	A02	CHH	8149001	8149500	Helitron-6_ALy
Misugi	A02	CHH	9181504	9182000	ATCopia52_I-int
Misugi	A02	CHH	19065002	19065499	Athila4C_I-int
Misugi	A02	CHH	19794505	19794996	Gypsy-42_BRa-LTR
Misugi	A02	CHH	22277503	22277995	L1-2_BRa
Misugi	A03	CHH	25540002	25540497	ATLINE1_4
Misugi	A03	CHH	32577001	32577500	Copia-7_BRa-I
Misugi	A03	CHH	35449504	35449999	ATCopia10_I-int
Misugi	A04	CHH	3269501	3269999	SIMPLEGUY1
Misugi	A04	CHH	3269501	3269999	L1-2_BRa
Misugi	A05	CHH	8257161	8257500	Copia-100_BRa-I
Misugi	A05	CHH	9901505	9902000	HARB-3_ALy
Misugi	A05	CHH	10088501	10089000	Copia-63_ALY-I
Misugi	A05	CHH	13508006	13508499	Gypsy-44_BRa-LTR
Misugi	A05	CHH	13508006	13508499	Gypsy-44_BRa-LTR
Misugi	A05	CHH	13508006	13508499	Gypsy-44_BRa-I
Misugi	A05	CHH	13848001	13848496	Copia-130_BRa-I
Misugi	A05	CHH	18043158	18043498	Gypsy-7_BRa-LTR
Misugi	A05	CHH	22973507	22973958	L1-1_ALy
Misugi	A06	CHH	2548001	2548446	SIMPLEHAT3_ALy
Misugi	A06	CHH	4784001	4784499	Copia-14_EPa-I
Misugi	A06	CHH	5265004	5265500	ATRAN
Misugi	A06	CHH	5265004	5265500	LT1_EPa
Misugi	A06	CHH	6245501	6245999	Copia-46_BRa-I
Misugi	A06	CHH	8399003	8399500	LT1_EPa
Misugi	A06	CHH	8399003	8399500	Copia-75_ST-I
Misugi	A06	CHH	8399003	8399500	LT1_EPa
Misugi	A06	CHH	8399003	8399500	ATRAN
Misugi	A06	CHH	12379520	12380000	EnSpm-1_BRa
Misugi	A06	CHH	12379520	12380000	EnSpm-2_ALy
Misugi	A06	CHH	12379520	12380000	EnSpm-2_ALy
Misugi	A06	CHH	12379520	12380000	Copia-52_BRa-I
Misugi	A06	CHH	13140501	13140992	Gypsy-44_BRa-I
Misugi	A06	CHH	16986502	16986995	Cassandra_AT-LTR
Misugi	A06	CHH	16986502	16986995	Cassandra_AT-LTR
Misugi	A06	CHH	17361503	17361999	L1-2_BRa
Misugi	A06	CHH	25797003	25797490	HATN2_ALy
Misugi	A06	CHH	25948002	25948500	Cassandra_AT-LTR
Misugi	A06	CHH	25948002	25948500	ATHATN3
Misugi	A06	CHH	25948002	25948500	Gypsy-44_BRa-LTR
Misugi	A07	CHH	7728001	7728499	Vandal5A
Misugi	A07	CHH	10671009	10671499	Vandal16
Misugi	A07	CHH	11933504	11933996	ATHATN4
Misugi	A07	CHH	11933504	11933996	HATN2_ALy
Misugi	A07	CHH	17746501	17746998	Cassandra_AT-LTR
Misugi	A07	CHH	17746501	17746998	Cassandra_AT-LTR
Misugi	A07	CHH	24122001	24122500	HARB-10_ALy
Misugi	A08	CHH	990001	990500	L1-2_BRa
Misugi	A08	CHH	990001	990500	Helitron-N11_ALy
Misugi	A08	CHH	990001	990500	HAT-N12_Mad
Misugi	A08	CHH	4291501	4292000	Gypsy-42_BRa-LTR
Misugi	A08	CHH	18184006	18184500	Cassandra_AT-LTR
Misugi	A08	CHH	21227002	21227498	Gypsy-1_BRa-I
Misugi	A09	CHH	4324501	4325000	Vandal9
Misugi	A09	CHH	12060002	12060500	Gypsy-47_BRa-LTR
Misugi	A09	CHH	13934001	13934500	TAG3N1
Misugi	A09	CHH	13934001	13934500	hAT-N1_ALy
Misugi	A09	CHH	14495001	14495498	Gypsy-125_SBi-LTR
Misugi	A09	CHH	21855013	21855495	ATMU10
Misugi	A09	CHH	21855013	21855495	MuDR-N12_ALy
Misugi	A09	CHH	24654503	24655000	Gypsy-44_BRa-LTR
Misugi	A09	CHH	26130001	26130500	Gypsy-20_BRa-I
Misugi	A09	CHH	26130001	26130500	Gypsy-20_BRa-I
Misugi	A09	CHH	27742501	27743000	L1-2_BRa
Misugi	A09	CHH	29034004	29034498	Copia-126_BRa-I
Misugi	A09	CHH	37480508	37480999	Gypsy-7_BRa-LTR
Misugi	A10	CHH	9548501	9548998	Gypsy-42_BRa-LTR
Misugi	A10	CHH	9637507	9638000	Copia-16_EPa-I
Misugi	A10	CHH	13977505	13977999	L1-16_ALy
Nanane	A02	CG	8310501	8310991	HATN1_ALy
Nanane	A02	CG	31215507	31215998	ATHAT8
Nanane	A03	CG	12369501	12369998	HATN3_ALy
Nanane	A08	CG	4398007	4398500	Helitron-3_BRa
Nanane	A09	CG	9509003	9509498	SSU-rRNA_Ath
Nanane	A09	CG	14696531	14696999	ATHATN3
Nanane	A01	CHG	1947001	1947483	hAT-3_ALy
Nanane	A01	CHG	1947001	1947483	ATREP10A
Nanane	A01	CHG	4666501	4666999	Copia-5_BRa-I
Nanane	A01	CHG	12451504	12451996	Gypsy-31_BRa-LTR
Nanane	A01	CHG	13912502	13912998	Copia-60_BRa-I
Nanane	A01	CHG	14618005	14618498	SIMPLEHAT2_ALy
Nanane	A01	CHG	14618005	14618498	SIMPLEGUY1
Nanane	A01	CHG	15443501	15443997	Athila4C_I-int
Nanane	A01	CHG	15600002	15600498	Gypsy-42_BRa-LTR
Nanane	A01	CHG	16776503	16777000	Gypsy-20_MN-I
Nanane	A01	CHG	17334002	17334498	Gypsy-24_BRa-I
Nanane	A01	CHG	17380501	17380997	Vandal3
Nanane	A01	CHG	17388001	17388499	MuDR-17_ALy
Nanane	A01	CHG	19851002	19851498	L1-15_ALy
Nanane	A01	CHG	20493001	20493500	L1-6_ALy
Nanane	A01	CHG	20670003	20670497	HARB-3_ALy
Nanane	A01	CHG	24625004	24625498	hAT-N1_ALy
Nanane	A01	CHG	24625004	24625498	TAG1
Nanane	A01	CHG	24625004	24625498	TAG3N1
Nanane	A02	CHG	2275146	2275498	ATHATN6
Nanane	A02	CHG	5389003	5389496	Copia-63_BRa-I
Nanane	A02	CHG	5784004	5784359	snRNA-1_OS
Nanane	A02	CHG	13384501	13385000	Copia-32_BRa-I
Nanane	A02	CHG	16865506	16865995	DNA-6_ALy
Nanane	A02	CHG	21527501	21527998	Gypsy-35_BRa-I
Nanane	A02	CHG	25206003	25206495	MuDR-5_ALy
Nanane	A02	CHG	26665005	26665499	Helitron4
Nanane	A03	CHG	4770003	4770500	hAT-3_ALy
Nanane	A03	CHG	4770003	4770500	HATN2_ALy
Nanane	A03	CHG	13900003	13900500	Cassandra_AT-I
Nanane	A03	CHG	13900003	13900500	Cassandra_AT-LTR
Nanane	A03	CHG	19571007	19571414	Gypsy-19_BRa-LTR
Nanane	A03	CHG	24880501	24881000	L1-2_ALy
Nanane	A03	CHG	24880501	24881000	L1-15_ALy
Nanane	A03	CHG	29836001	29836500	L1-8_ALy
Nanane	A03	CHG	32366001	32366482	HARB-9_ALy
Nanane	A03	CHG	35957001	35957499	ATCopia95_I-int
Nanane	A03	CHG	36921501	36922000	Gypsy-42_BRa-LTR
Nanane	A04	CHG	6622002	6622498	Helitron-1_EPa
Nanane	A04	CHG	7416002	7416498	L1-2_BRa
Nanane	A04	CHG	9171001	9171497	HARB-3_ALy
Nanane	A05	CHG	5257002	5257500	BoSB6B
Nanane	A05	CHG	5283012	5283492	ATREP10
Nanane	A05	CHG	9327002	9327499	Copia-97_BRa-I
Nanane	A05	CHG	20548504	20548999	L1-16_ALy
Nanane	A05	CHG	22722501	22722999	ATHATN3A
Nanane	A05	CHG	24244502	24244994	L1-13_ALy
Nanane	A06	CHG	2240005	2240362	ATHATN3A
Nanane	A06	CHG	6634501	6634998	ATHATN3
Nanane	A06	CHG	10432501	10432996	L1-3_BRa
Nanane	A06	CHG	14412501	14413000	Gypsy-42_BRa-I
Nanane	A06	CHG	14470004	14470500	Gypsy-42_BRa-LTR
Nanane	A06	CHG	15185502	15185999	Athila4C_I-int
Nanane	A06	CHG	15978002	15978500	Gypsy-44_BRa-LTR
Nanane	A06	CHG	16563006	16563500	L1-1_EPa
Nanane	A06	CHG	16618502	16618998	Atlantys1_I-int
Nanane	A07	CHG	7544008	7544499	Gypsy-42_BRa-LTR
Nanane	A07	CHG	7544008	7544499	Gypsy-1_EPa-I
Nanane	A07	CHG	8776501	8776996	Athila7_I-int
Nanane	A07	CHG	8838501	8839000	Copia-125_BRa-I
Nanane	A07	CHG	8838501	8839000	Copia-125_BRa-I
Nanane	A07	CHG	10581003	10581500	ATLINE1_8
Nanane	A07	CHG	13686505	13686996	Gypsy-7_BRa-LTR
Nanane	A08	CHG	3625502	3625997	Copia-5_BRa-I
Nanane	A08	CHG	3774003	3774498	ATCopia95_I-int
Nanane	A08	CHG	4230501	4230996	L1-1_EPa
Nanane	A08	CHG	7450001	7450500	ATLINEIII
Nanane	A08	CHG	7468502	7469000	HARB-5_ALy
Nanane	A09	CHG	17053502	17053997	Vandal16
Nanane	A09	CHG	17085018	17085498	BRENSPM1
Nanane	A09	CHG	18067003	18067500	ATGP8I
Nanane	A09	CHG	20544505	20544998	Gypsy-42_BRa-I
Nanane	A09	CHG	22407001	22407497	Gypsy-42_BRa-I
Nanane	A09	CHG	22492503	22492999	Gypsy-20_BRa-I
Nanane	A09	CHG	24463512	24463999	ATREP10A
Nanane	A09	CHG	24463512	24463999	HATN3_ALy
Nanane	A09	CHG	24611015	24611491	Gypsy-42_BRa-LTR
Nanane	A09	CHG	33581001	33581500	ATLINE1_5
Nanane	A09	CHG	35369501	35369998	ATTIRTA1
Nanane	A09	CHG	38663502	38664000	BEL1-I_SM
Nanane	A10	CHG	1076001	1076500	HARB-3_ALy
Nanane	A10	CHG	4562003	4562500	Athila4_I-int
Nanane	A01	CHH	2210503	2210999	Copia-6_BRa-I
Nanane	A01	CHH	12126512	12127000	BoSB6D
Nanane	A01	CHH	14618005	14618498	SIMPLEHAT2_ALy
Nanane	A01	CHH	14618005	14618498	SIMPLEGUY1
Nanane	A01	CHH	28980501	28980994	MuDR-1_BRa
Nanane	A02	CHH	17565511	17565999	Gypsy-42_BRa-LTR
Nanane	A02	CHH	17637501	17637996	EnSpm-1_BRa
Nanane	A02	CHH	17637501	17637996	EnSpm-1_BRa
Nanane	A03	CHH	22086008	22086500	Cassandra_AT-LTR
Nanane	A03	CHH	27374504	27374999	EnSpm-1_BRa
Nanane	A03	CHH	29212001	29212465	BoSB5C
Nanane	A03	CHH	32729004	32729496	DNA-6B_ALy
Nanane	A03	CHH	37476024	37476496	hAT-N1_STu
Nanane	A04	CHH	5779505	5780000	Gypsy-44_BRa-LTR
Nanane	A04	CHH	5779505	5780000	Gypsy-44_BRa-LTR
Nanane	A04	CHH	7646501	7647000	HARB-1_ALy
Nanane	A04	CHH	7646501	7647000	L1-1_EPa
Nanane	A04	CHH	13918505	13918998	SIMPLEGUY1
Nanane	A04	CHH	13918505	13918998	SIMPLEHAT3_ALy
Nanane	A04	CHH	14772002	14772498	ATHATN3A
Nanane	A05	CHH	8229316	8229500	Vandal3
Nanane	A05	CHH	9200002	9200497	MuDR-5_EPa
Nanane	A05	CHH	9200002	9200497	MuDR-5_EPa
Nanane	A05	CHH	10940003	10940498	ATIS112A
Nanane	A05	CHH	14882006	14882499	Gypsy-42_BRa-I
Nanane	A05	CHH	19051505	19051997	hAT-2_RC
Nanane	A06	CHH	1544001	1544500	Gypsy-13_BRa-I
Nanane	A06	CHH	11861501	11862000	ATCopia59_I-int
Nanane	A06	CHH	14890503	14890995	ATHATN3
Nanane	A06	CHH	14890503	14890995	ATREP10A
Nanane	A06	CHH	21037138	21037499	Gypsy-42_BRa-LTR
Nanane	A06	CHH	21037138	21037499	Gypsy-38B_NS-I
Nanane	A06	CHH	22795502	22796000	Copia-63_BRa-I
Nanane	A07	CHH	7014502	7014997	Gypsy-20_BRa-I
Nanane	A07	CHH	11564003	11564500	Copia-11_ALY-I
Nanane	A07	CHH	13696501	13696999	ATHATN3
Nanane	A07	CHH	13782001	13782496	Copia-126_BRa-I
Nanane	A07	CHH	14666501	14666998	HATN3_ALy
Nanane	A07	CHH	14913001	14913499	Copia-2_EPa-I
Nanane	A07	CHH	15243502	15243994	L1-2_BRa
Nanane	A07	CHH	19308501	19309000	HARB-N1_ALy
Nanane	A07	CHH	19308501	19309000	SIMPLEGUY1
Nanane	A08	CHH	4119001	4119498	L1-2_BRa
Nanane	A08	CHH	4243001	4243500	Copia-94_BRa-LTR
Nanane	A08	CHH	15249002	15249499	BoSB7A
Nanane	A08	CHH	15249002	15249499	Gypsy-7_BRa-LTR
Nanane	A08	CHH	21105503	21105974	Copia-118_BRa-I
Nanane	A09	CHH	8552002	8552497	MuDR-N10_ALy
Nanane	A09	CHH	13197001	13197497	Helitron-1_BRa
Nanane	A09	CHH	14039502	14040000	L1-13_ALy
Nanane	A09	CHH	17646001	17646485	L1-2_BRa
Nanane	A09	CHH	21763501	21763999	Gypsy-44_BRa-I
Nanane	A09	CHH	22268504	22268992	ATCopia29_I-int
Nanane	A09	CHH	22268504	22268992	Gypsy-47_BRa-LTR
Nanane	A09	CHH	22268504	22268992	Gypsy-47_BRa-LTR
Nanane	A09	CHH	23727003	23727493	BRENSPM1
Nanane	A09	CHH	26086133	26086498	hAT-N7_ALy
Nanane	A09	CHH	35369501	35369998	ATTIRTA1
Nanane	A09	CHH	39923501	39923999	Copia-134_BRa-LTR
Nanane	A10	CHH	2661002	2661497	HARB-N1_ALy
Nanane	A10	CHH	2661002	2661497	HARB-N1_ALy
Nanane	A10	CHH	5094502	5094998	Gypsy-23_ALY-I
Nanane	A10	CHH	9636510	9636998	Copia-16_EPa-LTR
Nanane	A10	CHH	9636510	9636998	Copia-16_EPa-I
Nanane	A10	CHH	12254502	12255000	SIMPLEGUY1

## Sheet: Table S6
Supplementary Table S6. Differentially expressed genes between control samples and samples infected with Albugo candida
Gene ID	Locus	log2 (fold_change)	Expression		Gene ID	Locus	log2 (fold_change)	Expression
Misugi					Nanane
BraA01g000070.3C	A01:21105-22090	-1.8836	Down		BraA01g000050.3C	A01:12430-13279	-2.36728	Down
BraA01g000670.3C	A01:350104-350935	-0.927295	Down		BraA01g000450.3C	A01:213418-228208	-2.4145	Down
BraA01g000700.3C	A01:365089-367609	-1.10959	Down		BraA01g000700.3C	A01:365089-367609	-2.26836	Down
BraA01g000720.3C	A01:379765-381148	-1.55261	Down		BraA01g000720.3C	A01:379765-381148	-4.37596	Down
BraA01g000950.3C	A01:445523-447994	-0.975205	Down		BraA01g001080.3C	A01:496907-498395	-2.77538	Down
BraA01g001080.3C	A01:496907-498395	-1.17996	Down		BraA01g001200.3C	A01:580290-581324	-2.08266	Down
BraA01g001200.3C	A01:580290-581324	-1.18496	Down		BraA01g001230.3C	A01:609037-611315	-2.47955	Down
BraA01g001230.3C	A01:609037-611315	-0.826285	Down		BraA01g002360.3C	A01:1164126-1168172	-2.23214	Down
BraA01g002110.3C	A01:1041671-1043045	-1.51249	Down		BraA01g002450.3C	A01:1214150-1218020	-2.64695	Down
BraA01g002980.3C	A01:1462681-1468250	-0.74469	Down		BraA01g003130.3C	A01:1529806-1533773	-2.19337	Down
BraA01g003070.3C	A01:1500727-1501153	-1.16247	Down		BraA01g003300.3C	A01:1640082-1640823	-2.60856	Down
BraA01g003280.3C	A01:1631726-1633925	-2.8716	Down		BraA01g003380.3C	A01:1686530-1688167	-3.16126	Down
BraA01g003540.3C	A01:1756340-1756664	-1.90625	Down		BraA01g004700.3C	A01:2260888-2264695	-2.53098	Down
BraA01g003570.3C	A01:1765636-1767304	-1.18625	Down		BraA01g004730.3C	A01:2271768-2278367	-2.27032	Down
BraA01g003630.3C	A01:1788423-1789324	-1.62418	Down		BraA01g005310.3C	A01:2542785-2546833	-2.47652	Down
BraA01g003990.3C	A01:1942124-1946165	-0.870031	Down		BraA01g005810.3C	A01:2800092-2802143	-2.58978	Down
BraA01g004020.3C	A01:1955797-1958640	-2.92527	Down		BraA01g005830.3C	A01:2805784-2808306	-2.17474	Down
BraA01g004050.3C	A01:1969445-1971848	-0.910122	Down		BraA01g005920.3C	A01:2837500-2839745	-2.27473	Down
BraA01g004350.3C	A01:2110154-2117169	-2.55804	Down		BraA01g006070.3C	A01:2941558-2941951	No expression in inoculated samples	Down
BraA01g004430.3C	A01:2145063-2147398	-1.02615	Down		BraA01g006120.3C	A01:2960687-2964047	-2.22856	Down
BraA01g004640.3C	A01:2235507-2237109	No expression in ionculated samples	Down		BraA01g006290.3C	A01:3031335-3033947	-2.38227	Down
BraA01g004730.3C	A01:2271768-2278367	-0.758428	Down		BraA01g006330.3C	A01:3057501-3059535	-2.40817	Down
BraA01g004920.3C	A01:2350130-2354409	-1.52754	Down		BraA01g006340.3C	A01:3060261-3062349	-2.88185	Down
BraA01g005170.3C	A01:2469752-2470244	-1.87001	Down		BraA01g006600.3C	A01:3160959-3162290	-3.34575	Down
BraA01g005380.3C	A01:2586712-2587558	-1.63866	Down		BraA01g006680.3C	A01:3190103-3192089	-2.40942	Down
BraA01g005600.3C	A01:2718050-2720330	-2.5946	Down		BraA01g007220.3C	A01:3443001-3443946	-3.64768	Down
BraA01g005810.3C	A01:2800092-2802143	-0.987555	Down		BraA01g007420.3C	A01:3556306-3557350	-2.32088	Down
BraA01g005830.3C	A01:2805784-2808306	-1.07766	Down		BraA01g007480.3C	A01:3586758-3590380	-5.68468	Down
BraA01g005920.3C	A01:2837500-2839745	-1.16152	Down		BraA01g007720.3C	A01:3736616-3739495	-3.80383	Down
BraA01g006190.3C	A01:2992535-2993966	-1.11127	Down		BraA01g007830.3C	A01:3807249-3814675	-2.77667	Down
BraA01g006320.3C	A01:3053566-3054947	-0.898691	Down		BraA01g007920.3C	A01:3839295-3840858	-7.93186	Down
BraA01g006330.3C	A01:3057501-3059535	-1.55799	Down		BraA01g007960.3C	A01:3861531-3863157	-3.26291	Down
BraA01g006340.3C	A01:3060261-3062349	-1.73767	Down		BraA01g009340.3C	A01:4676462-4677793	-2.72207	Down
BraA01g006600.3C	A01:3160959-3162290	-4.29143	Down		BraA01g009460.3C	A01:4768792-4769485	-2.90243	Down
BraA01g006780.3C	A01:3239210-3241441	-1.00428	Down		BraA01g009470.3C	A01:4774533-4775427	-3.03208	Down
BraA01g007020.3C	A01:3355341-3357637	-1.01273	Down		BraA01g009650.3C	A01:4885347-4888870	-2.49677	Down
BraA01g007220.3C	A01:3443001-3443946	-1.72996	Down		BraA01g010170.3C	A01:5220788-5222334	-4.04918	Down
BraA01g007420.3C	A01:3556306-3557350	-2.19949	Down		BraA01g010180.3C	A01:5223932-5226897	-3.27172	Down
BraA01g007460.3C	A01:3572743-3577245	-1.21042	Down		BraA01g010230.3C	A01:5250362-5251847	-2.63821	Down
BraA01g007480.3C	A01:3586758-3590380	-2.80897	Down		BraA01g010330.3C	A01:5310726-5314567	-2.08134	Down
BraA01g007720.3C	A01:3736616-3739495	-2.41636	Down		BraA01g011300.3C	A01:5892767-5894842	-2.34462	Down
BraA01g007830.3C	A01:3807249-3814675	-0.901863	Down		BraA01g011600.3C	A01:6042895-6044503	-4.07218	Down
BraA01g007960.3C	A01:3861531-3863157	-1.36099	Down		BraA01g011610.3C	A01:6048921-6050927	-3.40714	Down
BraA01g008440.3C	A01:4126211-4130058	-0.827657	Down		BraA01g012670.3C	A01:6598183-6600578	-2.03846	Down
BraA01g008650.3C	A01:4248185-4249805	No expression in ionculated samples	Down		BraA01g012700.3C	A01:6618088-6619655	-5.04457	Down
BraA01g008840.3C	A01:4367990-4371571	-4.92996	Down		BraA01g013230.3C	A01:6925726-6926209	-4.178	Down
BraA01g009260.3C	A01:4621750-4622747	-1.47458	Down		BraA01g013360.3C	A01:6996187-6999844	-3.26469	Down
BraA01g009340.3C	A01:4676462-4677793	-2.41536	Down		BraA01g013370.3C	A01:7004730-7006410	-2.51769	Down
BraA01g009460.3C	A01:4768792-4769485	-1.44749	Down		BraA01g014060.3C	A01:7424685-7426915	-2.80365	Down
BraA01g009470.3C	A01:4774533-4775427	-1.09726	Down		BraA01g014210.3C	A01:7511685-7512855	-4.63046	Down
BraA01g009560.3C	A01:4833865-4836670	-0.989403	Down		BraA01g014510.3C	A01:7731417-7734368	-2.40163	Down
BraA01g009650.3C	A01:4885347-4888870	-0.819195	Down		BraA01g014830.3C	A01:7883889-7888416	-2.30729	Down
BraA01g010120.3C	A01:5182598-5190373	-0.816373	Down		BraA01g015350.3C	A01:8148015-8148963	-4.54351	Down
BraA01g010170.3C	A01:5220788-5222334	-1.65482	Down		BraA01g015510.3C	A01:8233167-8235198	-3.15226	Down
BraA01g010180.3C	A01:5223932-5226897	-1.45518	Down		BraA01g016370.3C	A01:8684543-8687190	-4.22799	Down
BraA01g010230.3C	A01:5250362-5251847	-1.60149	Down		BraA01g016430.3C	A01:8703729-8705643	-3.61822	Down
BraA01g010260.3C	A01:5261721-5262617	-1.00832	Down		BraA01g016910.3C	A01:8997562-8999289	-3.25331	Down
BraA01g010280.3C	A01:5266053-5267699	-1.55076	Down		BraA01g017580.3C	A01:9364302-9366206	-3.02593	Down
BraA01g010320.3C	A01:5298537-5299023	-0.84813	Down		BraA01g018100.3C	A01:9641089-9641608	-2.95694	Down
BraA01g010790.3C	A01:5598609-5602528	-0.76741	Down		BraA01g018750.3C	A01:9981123-9983373	-3.52991	Down
BraA01g011300.3C	A01:5892767-5894842	-1.47318	Down		BraA01g019070.3C	A01:10129829-10131413	-2.11827	Down
BraA01g011340.3C	A01:5918244-5919951	-0.816125	Down		BraA01g019450.3C	A01:10389926-10391815	-2.95947	Down
BraA01g011600.3C	A01:6042895-6044503	-3.42314	Down		BraA01g019880.3C	A01:10672755-10675461	-3.11151	Down
BraA01g011610.3C	A01:6048921-6050927	-1.12055	Down		BraA01g020020.3C	A01:10758255-10759737	-3.22802	Down
BraA01g011640.3C	A01:6071972-6073177	-1.42842	Down		BraA01g022060.3C	A01:12247600-12248817	-2.85311	Down
BraA01g012670.3C	A01:6598183-6600578	-1.00689	Down		BraA01g023290.3C	A01:13267634-13268519	-4.40406	Down
BraA01g012700.3C	A01:6618088-6619655	-1.32313	Down		BraA01g023800.3C	A01:13700573-13704381	-2.70515	Down
BraA01g012720.3C	A01:6634226-6637770	-0.922024	Down		BraA01g024740.3C	A01:14486645-14488195	-2.5011	Down
BraA01g013180.3C	A01:6899270-6899906	-1.65881	Down		BraA01g025230.3C	A01:14911024-14912773	-3.53208	Down
BraA01g013190.3C	A01:6904119-6905436	-1.00421	Down		BraA01g025390.3C	A01:15081971-15084140	-2.28292	Down
BraA01g013200.3C	A01:6906365-6908043	-1.17123	Down		BraA01g025930.3C	A01:15726879-15729386	-2.23796	Down
BraA01g013370.3C	A01:7004730-7006410	-1.18983	Down		BraA01g027600.3C	A01:17791854-17795607	-2.83832	Down
BraA01g013500.3C	A01:7076406-7078443	-1.05656	Down		BraA01g027750.3C	A01:17946425-17950059	-2.18118	Down
BraA01g013510.3C	A01:7079213-7084962	-1.36968	Down		BraA01g027860.3C	A01:18049533-18052102	-2.6866	Down
BraA01g013520.3C	A01:7085317-7090383	-2.23172	Down		BraA01g028110.3C	A01:18343047-18345081	-5.68361	Down
BraA01g013630.3C	A01:7186713-7189949	-2.04717	Down		BraA01g028540.3C	A01:18693171-18696704	-3.30888	Down
BraA01g013650.3C	A01:7204968-7210431	-2.27093	Down		BraA01g029020.3C	A01:19118759-19121263	-2.26734	Down
BraA01g013810.3C	A01:7295660-7298413	-2.52317	Down		BraA01g029710.3C	A01:19806208-19809231	-2.70151	Down
BraA01g014210.3C	A01:7511685-7512855	-2.61652	Down		BraA01g030100.3C	A01:20149270-20155631	-3.25002	Down
BraA01g014470.3C	A01:7712980-7713928	-2.09381	Down		BraA01g030200.3C	A01:20253153-20254956	-2.46582	Down
BraA01g014830.3C	A01:7883889-7888416	-1.00283	Down		BraA01g030530.3C	A01:20506078-20510831	-2.30971	Down
BraA01g014850.3C	A01:7894936-7897333	-1.38991	Down		BraA01g030580.3C	A01:20552686-20553880	No expression in inoculated samples	Down
BraA01g014910.3C	A01:7938063-7940042	-1.07785	Down		BraA01g031080.3C	A01:20991640-20993541	-3.39849	Down
BraA01g015460.3C	A01:8212747-8213101	-1.20108	Down		BraA01g031150.3C	A01:21081108-21082353	-3.28769	Down
BraA01g015510.3C	A01:8233167-8235198	-2.38196	Down		BraA01g031210.3C	A01:21123668-21125612	-2.57787	Down
BraA01g015530.3C	A01:8243915-8245466	-0.94093	Down		BraA01g031740.3C	A01:21574834-21577817	-1.98704	Down
BraA01g016010.3C	A01:8480097-8480706	-1.93442	Down		BraA01g032090.3C	A01:21885379-21889127	-2.93301	Down
BraA01g016370.3C	A01:8684543-8687190	-1.73346	Down		BraA01g032130.3C	A01:21921545-21923039	-5.03422	Down
BraA01g016430.3C	A01:8703729-8705643	-2.25212	Down		BraA01g033140.3C	A01:22596101-22596981	-2.67795	Down
BraA01g016910.3C	A01:8997562-8999289	-2.70954	Down		BraA01g033430.3C	A01:22865524-22867618	-2.59703	Down
BraA01g017280.3C	A01:9193688-9197050	-1.79983	Down		BraA01g033620.3C	A01:22968701-22969496	-4.35799	Down
BraA01g017460.3C	A01:9294093-9297011	-1.88394	Down		BraA01g034150.3C	A01:23426976-23428354	-4.02791	Down
BraA01g017580.3C	A01:9364302-9366206	-1.54807	Down		BraA01g034500.3C	A01:23636824-23642255	-3.02515	Down
BraA01g017750.3C	A01:9446729-9447626	-0.947307	Down		BraA01g035040.3C	A01:24004929-24006155	-2.89312	Down
BraA01g018050.3C	A01:9621254-9622044	-0.996945	Down		BraA01g035070.3C	A01:24016811-24017424	-3.28863	Down
BraA01g018100.3C	A01:9641089-9641608	-2.82286	Down		BraA01g035640.3C	A01:24384446-24386855	-3.18847	Down
BraA01g018750.3C	A01:9981123-9983373	-2.07635	Down		BraA01g035870.3C	A01:24503642-24504663	-2.56428	Down
BraA01g019020.3C	A01:10115146-10115734	-1.10305	Down		BraA01g036100.3C	A01:24671115-24672384	-2.23555	Down
BraA01g019070.3C	A01:10129829-10131413	-1.29736	Down		BraA01g036780.3C	A01:25046980-25050452	-3.45489	Down
BraA01g019270.3C	A01:10317738-10319386	-1.26756	Down		BraA01g036870.3C	A01:25102231-25102873	-2.67915	Down
BraA01g019360.3C	A01:10358837-10361778	-0.911361	Down		BraA01g037270.3C	A01:25333434-25335231	-4.60968	Down
BraA01g019450.3C	A01:10389926-10391815	-2.01762	Down		BraA01g038810.3C	A01:26269512-26272150	-4.14447	Down
BraA01g019600.3C	A01:10452876-10453272	-0.735602	Down		BraA01g038920.3C	A01:26312308-26312860	No expression in inoculated samples	Down
BraA01g019880.3C	A01:10672755-10675461	-0.928626	Down		BraA01g040190.3C	A01:26997767-27002349	-2.06921	Down
BraA01g019890.3C	A01:10675817-10682348	-1.94468	Down		BraA01g040680.3C	A01:27354098-27356217	-2.23074	Down
BraA01g020020.3C	A01:10758255-10759737	-3.4707	Down		BraA01g040700.3C	A01:27365606-27367496	-2.35505	Down
BraA01g020440.3C	A01:10970665-10971988	-1.4905	Down		BraA01g041020.3C	A01:27561575-27563475	-2.06335	Down
BraA01g021070.3C	A01:11454363-11454672	No expression in ionculated samples	Down		BraA01g041590.3C	A01:27849991-27851961	-2.09536	Down
BraA01g021150.3C	A01:11497065-11498499	-2.62142	Down		BraA01g042280.3C	A01:28236948-28237214	-2.84092	Down
BraA01g021380.3C	A01:11695685-11697137	-0.833099	Down		BraA01g042350.3C	A01:28270351-28270948	-2.82288	Down
BraA01g021390.3C	A01:11701013-11701307	-2.21475	Down		BraA01g044400.3C	A01:29301109-29302075	-2.07727	Down
BraA01g021500.3C	A01:11769474-11772099	-0.955709	Down		BraA02g000100.3C	A02:79061-79853	-2.49504	Down
BraA01g022340.3C	A01:12498831-12500540	-0.934801	Down		BraA02g000110.3C	A02:101864-103160	-2.65857	Down
BraA01g022350.3C	A01:12501381-12502078	-0.750701	Down		BraA02g001580.3C	A02:799115-801147	-3.12927	Down
BraA01g022980.3C	A01:13000620-13003317	-0.988039	Down		BraA02g002030.3C	A02:1020208-1025130	-2.57002	Down
BraA01g023800.3C	A01:13700573-13704381	-2.11756	Down		BraA02g002450.3C	A02:1239839-1241537	-3.02985	Down
BraA01g023840.3C	A01:13732327-13737083	-1.52209	Down		BraA02g003170.3C	A02:1543915-1545953	-2.30849	Down
BraA01g023870.3C	A01:13755315-13758872	-3.46917	Down		BraA02g003870.3C	A02:1878376-1879025	-3.81057	Down
BraA01g023880.3C	A01:13763900-13768717	-2.42759	Down		BraA02g003970.3C	A02:1938254-1941590	-2.67254	Down
BraA01g023990.3C	A01:13861661-13862867	-0.792533	Down		BraA02g004470.3C	A02:2150138-2154481	-2.09252	Down
BraA01g024080.3C	A01:13893169-13893892	-1.02484	Down		BraA02g004550.3C	A02:2191480-2193409	-2.6828	Down
BraA01g024740.3C	A01:14486645-14488195	-2.26023	Down		BraA02g004580.3C	A02:2205157-2209254	-3.23075	Down
BraA01g025390.3C	A01:15081971-15084140	-0.943698	Down		BraA02g004990.3C	A02:2409214-2411732	-2.98471	Down
BraA01g025930.3C	A01:15726879-15729386	-1.1523	Down		BraA02g005440.3C	A02:2581553-2584022	-2.79177	Down
BraA01g027200.3C	A01:17496507-17499031	-0.998413	Down		BraA02g006200.3C	A02:2943691-2944824	-2.88231	Down
BraA01g027230.3C	A01:17532568-17534252	-0.805698	Down		BraA02g006210.3C	A02:2946946-2948161	-2.4987	Down
BraA01g027430.3C	A01:17693298-17695047	-2.44399	Down		BraA02g006300.3C	A02:2986658-2987546	-2.27146	Down
BraA01g027600.3C	A01:17791854-17795607	-1.67136	Down		BraA02g006570.3C	A02:3114631-3116649	-2.91404	Down
BraA01g027720.3C	A01:17920377-17924651	-1.32696	Down		BraA02g006790.3C	A02:3225909-3227464	-3.05804	Down
BraA01g027860.3C	A01:18049533-18052102	-0.835333	Down		BraA02g006880.3C	A02:3256632-3257440	-3.30626	Down
BraA01g028220.3C	A01:18445008-18450514	-1.09325	Down		BraA02g006890.3C	A02:3258091-3260391	-2.73721	Down
BraA01g028370.3C	A01:18599381-18600572	-1.24455	Down		BraA02g006960.3C	A02:3281588-3283830	-4.50637	Down
BraA01g028540.3C	A01:18693171-18696704	-1.38505	Down		BraA02g007000.3C	A02:3302043-3302595	-3.23224	Down
BraA01g028620.3C	A01:18802672-18803119	-1.37204	Down		BraA02g007860.3C	A02:3683945-3688226	-2.34619	Down
BraA01g028960.3C	A01:19080604-19082601	-1.2597	Down		BraA02g008200.3C	A02:3915146-3917695	-2.44433	Down
BraA01g028970.3C	A01:19093011-19095561	-1.25902	Down		BraA02g008610.3C	A02:4072579-4073782	-3.64401	Down
BraA01g029020.3C	A01:19118759-19121263	-1.47148	Down		BraA02g008750.3C	A02:4121310-4126176	-2.17108	Down
BraA01g029450.3C	A01:19496967-19497568	-1.95418	Down		BraA02g008900.3C	A02:4191191-4200604	-2.89864	Down
BraA01g029710.3C	A01:19806208-19809231	-0.858272	Down		BraA02g009050.3C	A02:4253633-4254092	-2.87225	Down
BraA01g030100.3C	A01:20149270-20155631	-0.836242	Down		BraA02g009570.3C	A02:4557361-4558681	-2.21354	Down
BraA01g030170.3C	A01:20210901-20212284	-0.766398	Down		BraA02g009650.3C	A02:4600062-4600875	-3.8788	Down
BraA01g030230.3C	A01:20271037-20273990	-1.04622	Down		BraA02g010960.3C	A02:5350761-5351931	-2.81312	Down
BraA01g030530.3C	A01:20506078-20510831	-1.93131	Down		BraA02g011440.3C	A02:5556988-5558544	-4.55361	Down
BraA01g030580.3C	A01:20552686-20553880	No expression in ionculated samples	Down		BraA02g011610.3C	A02:5635352-5637209	-2.97735	Down
BraA01g031080.3C	A01:20991640-20993541	-1.71982	Down		BraA02g012200.3C	A02:5945818-5953980	-2.13252	Down
BraA01g031100.3C	A01:21036155-21036827	-0.975915	Down		BraA02g012580.3C	A02:6259507-6260698	-2.73948	Down
BraA01g031150.3C	A01:21081108-21082353	-1.19626	Down		BraA02g012660.3C	A02:6356311-6357932	-4.45542	Down
BraA01g031210.3C	A01:21123668-21125612	-1.5541	Down		BraA02g012940.3C	A02:6548465-6551592	-2.20261	Down
BraA01g031220.3C	A01:21143812-21145343	-1.74371	Down		BraA02g013890.3C	A02:7091875-7092542	-2.84477	Down
BraA01g031350.3C	A01:21215611-21216506	-2.67133	Down		BraA02g013990.3C	A02:7163162-7164185	-3.01681	Down
BraA01g031950.3C	A01:21756194-21756566	-2.21405	Down		BraA02g014010.3C	A02:7180321-7185947	-2.785	Down
BraA01g032040.3C	A01:21837505-21840289	-0.772125	Down		BraA02g014250.3C	A02:7312205-7314398	-3.65764	Down
BraA01g032090.3C	A01:21885379-21889127	-1.58369	Down		BraA02g014480.3C	A02:7482148-7482535	-2.70679	Down
BraA01g032130.3C	A01:21921545-21923039	-3.99023	Down		BraA02g015330.3C	A02:7994746-7997398	-3.55995	Down
BraA01g032930.3C	A01:22444874-22451927	-0.895709	Down		BraA02g015600.3C	A02:8193020-8194727	-2.71333	Down
BraA01g033110.3C	A01:22580279-22583821	-1.10823	Down		BraA02g015850.3C	A02:8426122-8429947	-2.07039	Down
BraA01g033140.3C	A01:22596101-22596981	-1.08888	Down		BraA02g017300.3C	A02:9448740-9451380	-2.3163	Down
BraA01g033330.3C	A01:22806954-22808750	-1.96617	Down		BraA02g017390.3C	A02:9523803-9524626	-2.38166	Down
BraA01g034150.3C	A01:23426976-23428354	-1.59526	Down		BraA02g018330.3C	A02:10215146-10217095	-2.3899	Down
BraA01g034730.3C	A01:23775527-23777607	-1.19002	Down		BraA02g018360.3C	A02:10230422-10231328	-2.78376	Down
BraA01g034870.3C	A01:23886457-23887697	-1.2311	Down		BraA02g019000.3C	A02:10762213-10763179	-3.43488	Down
BraA01g035040.3C	A01:24004929-24006155	-1.12086	Down		BraA02g019300.3C	A02:10996142-10998645	-2.06328	Down
BraA01g035070.3C	A01:24016811-24017424	-2.82078	Down		BraA02g019400.3C	A02:11064392-11064920	-2.86017	Down
BraA01g035640.3C	A01:24384446-24386855	-1.7715	Down		BraA02g019430.3C	A02:11122665-11131499	-2.92506	Down
BraA01g035690.3C	A01:24417497-24419232	-2.15137	Down		BraA02g019870.3C	A02:11446761-11449315	-2.21494	Down
BraA01g035870.3C	A01:24503642-24504663	-1.27528	Down		BraA02g020170.3C	A02:11662179-11667576	-3.07623	Down
BraA01g036030.3C	A01:24634645-24636003	-1.20361	Down		BraA02g021820.3C	A02:12731827-12732499	-3.68427	Down
BraA01g036420.3C	A01:24822965-24823636	-1.47824	Down		BraA02g022140.3C	A02:12956501-12960242	-2.35069	Down
BraA01g036770.3C	A01:25044376-25045207	-1.35558	Down		BraA02g022640.3C	A02:13223880-13224788	-2.39049	Down
BraA01g036780.3C	A01:25046980-25050452	-1.8036	Down		BraA02g023240.3C	A02:13619892-13625441	-2.1094	Down
BraA01g037070.3C	A01:25212398-25214064	-1.68393	Down		BraA02g023510.3C	A02:13781010-13783583	-2.14401	Down
BraA01g037330.3C	A01:25390319-25394350	-1.19212	Down		BraA02g023560.3C	A02:13827264-13827903	-2.92489	Down
BraA01g037390.3C	A01:25448532-25454763	-1.25407	Down		BraA02g023990.3C	A02:14220681-14223537	-2.88903	Down
BraA01g037790.3C	A01:25703336-25706254	-1.78155	Down		BraA02g024090.3C	A02:14278484-14279428	-2.31194	Down
BraA01g037810.3C	A01:25710634-25714935	-0.95235	Down		BraA02g024250.3C	A02:14370510-14374128	-2.59241	Down
BraA01g038080.3C	A01:25894161-25894350	-1.90684	Down		BraA02g024370.3C	A02:14430060-14433186	-2.28679	Down
BraA01g038180.3C	A01:25958429-25959701	-1.19944	Down		BraA02g024390.3C	A02:14455554-14459256	-3.78477	Down
BraA01g038520.3C	A01:26101150-26102302	-0.989367	Down		BraA02g024630.3C	A02:14670120-14672441	-2.61656	Down
BraA01g038720.3C	A01:26231502-26232492	-0.848032	Down		BraA02g025260.3C	A02:15120053-15121157	-2.47358	Down
BraA01g038760.3C	A01:26247827-26248298	-1.61939	Down		BraA02g025430.3C	A02:15276024-15282276	-2.24081	Down
BraA01g038800.3C	A01:26260271-26266973	-1.09134	Down		BraA02g025510.3C	A02:15325370-15327458	-3.87497	Down
BraA01g039290.3C	A01:26479697-26480837	-2.95211	Down		BraA02g025540.3C	A02:15359383-15361113	No expression in inoculated samples	Down
BraA01g039440.3C	A01:26538895-26540233	-1.4275	Down		BraA02g026040.3C	A02:15629591-15631870	-2.90912	Down
BraA01g039470.3C	A01:26596383-26597019	-1.56505	Down		BraA02g027900.3C	A02:17223841-17226139	-2.30665	Down
BraA01g039860.3C	A01:26829319-26829634	-1.86256	Down		BraA02g028280.3C	A02:17587972-17588422	No expression in inoculated samples	Down
BraA01g039930.3C	A01:26873222-26873774	-1.70194	Down		BraA02g029020.3C	A02:18449067-18459673	-2.06154	Down
BraA01g039980.3C	A01:26900745-26901817	-2.31315	Down		BraA02g029910.3C	A02:19981492-19982507	No expression in inoculated samples	Down
BraA01g040030.3C	A01:26912845-26914239	-0.821386	Down		BraA02g030840.3C	A02:21017670-21018839	-2.35403	Down
BraA01g040060.3C	A01:26929484-26932181	-1.15632	Down		BraA02g031110.3C	A02:21234638-21237115	-3.0141	Down
BraA01g040170.3C	A01:26990653-26993629	-1.05449	Down		BraA02g031780.3C	A02:21822699-21824564	-3.72341	Down
BraA01g040190.3C	A01:26997767-27002349	-0.977598	Down		BraA02g032180.3C	A02:22169790-22172969	-2.18813	Down
BraA01g040640.3C	A01:27342784-27345062	-1.01547	Down		BraA02g033320.3C	A02:23024110-23027454	-2.18042	Down
BraA01g040680.3C	A01:27354098-27356217	-1.05023	Down		BraA02g035820.3C	A02:24848871-24851265	-3.19269	Down
BraA01g040700.3C	A01:27365606-27367496	-2.82762	Down		BraA02g035910.3C	A02:24917814-24918926	-3.37378	Down
BraA01g041020.3C	A01:27561575-27563475	-1.9475	Down		BraA02g036610.3C	A02:25518515-25519936	-2.90923	Down
BraA01g041490.3C	A01:27811945-27812867	-2.28906	Down		BraA02g036620.3C	A02:25544838-25545819	-3.21702	Down
BraA01g041590.3C	A01:27849991-27851961	-0.97448	Down		BraA02g036960.3C	A02:25904800-25906473	-2.28161	Down
BraA01g042270.3C	A01:28233210-28234675	-2.0102	Down		BraA02g036990.3C	A02:25939912-25940392	No expression in inoculated samples	Down
BraA01g042280.3C	A01:28236948-28237214	No expression in ionculated samples	Down		BraA02g037210.3C	A02:26095689-26098188	-2.51903	Down
BraA01g042350.3C	A01:28270351-28270948	-1.54748	Down		BraA02g038290.3C	A02:26733446-26734502	-2.39523	Down
BraA01g042940.3C	A01:28581773-28583336	-1.43303	Down		BraA02g038300.3C	A02:26738513-26739026	-2.25296	Down
BraA01g043230.3C	A01:28728524-28729983	-3.01294	Down		BraA02g038430.3C	A02:26806805-26808195	-3.58198	Down
BraA01g043260.3C	A01:28766634-28768323	-3.07361	Down		BraA02g038530.3C	A02:26851354-26854885	-2.85859	Down
BraA01g043690.3C	A01:28950867-28958749	-1.29181	Down		BraA02g038820.3C	A02:26977602-26982068	-2.09032	Down
BraA01g043890.3C	A01:29068385-29072545	-1.49941	Down		BraA02g039880.3C	A02:27715667-27717584	-3.57469	Down
BraA01g044090.3C	A01:29155469-29156529	No expression in ionculated samples	Down		BraA02g040080.3C	A02:27847183-27847684	-3.08993	Down
BraA01g044400.3C	A01:29301109-29302075	-2.36771	Down		BraA02g040170.3C	A02:27905765-27907091	-3.80469	Down
BraA01g044640.3C	A01:29416153-29417158	-1.18457	Down		BraA02g040210.3C	A02:27937820-27946163	-2.04852	Down
BraA01g044820.3C	A01:29528182-29529493	-0.897044	Down		BraA02g041840.3C	A02:29005545-29007116	-2.35838	Down
BraA01g044880.3C	A01:29545768-29546803	-1.56387	Down		BraA02g042730.3C	A02:29664946-29672210	-2.70489	Down
BraA02g000100.3C	A02:79061-79853	-2.48268	Down		BraA02g042740.3C	A02:29676222-29677516	-4.07088	Down
BraA02g000120.3C	A02:105853-107125	-0.924529	Down		BraA02g042910.3C	A02:29767329-29779772	-2.27796	Down
BraA02g000220.3C	A02:163578-164508	-1.1491	Down		BraA02g043710.3C	A02:30242328-30243686	-3.16494	Down
BraA02g000230.3C	A02:165555-173676	-0.856785	Down		BraA02g043800.3C	A02:30293342-30297897	-2.46133	Down
BraA02g000580.3C	A02:352806-353652	-1.70517	Down		BraA02g043810.3C	A02:30298316-30300687	-2.81906	Down
BraA02g000650.3C	A02:381698-383219	-0.920644	Down		BraA02g044290.3C	A02:30532542-30533822	-3.00578	Down
BraA02g000710.3C	A02:398213-398899	No expression in ionculated samples	Down		BraA02g044370.3C	A02:30593045-30596167	-3.47211	Down
BraA02g001580.3C	A02:799115-801147	-2.67703	Down		BraA02g044690.3C	A02:30762731-30765600	-2.58991	Down
BraA02g002030.3C	A02:1020208-1025130	-2.64809	Down		BraA02g044820.3C	A02:30821854-30822392	-2.22512	Down
BraA02g002450.3C	A02:1239839-1241537	-1.6693	Down		BraA02g045300.3C	A02:31101988-31104333	-2.57868	Down
BraA02g002640.3C	A02:1317029-1318935	-2.81164	Down		BraA03g000180.3C	A03:65081-70754	-2.29844	Down
BraA02g003170.3C	A02:1543915-1545953	-1.16524	Down		BraA03g000230.3C	A03:80864-82391	-2.16271	Down
BraA02g003450.3C	A02:1694231-1695961	-1.33844	Down		BraA03g000450.3C	A03:188535-190816	-3.27161	Down
BraA02g003710.3C	A02:1796963-1797568	-1.72483	Down		BraA03g001180.3C	A03:510486-512241	-2.23258	Down
BraA02g003870.3C	A02:1878376-1879025	-2.29728	Down		BraA03g001250.3C	A03:547491-550051	-2.85653	Down
BraA02g004150.3C	A02:2022099-2025843	-1.47228	Down		BraA03g001300.3C	A03:579113-583356	-2.63155	Down
BraA02g004370.3C	A02:2107561-2111985	-1.28101	Down		BraA03g002480.3C	A03:1098366-1099074	-2.92235	Down
BraA02g004580.3C	A02:2205157-2209254	-0.795451	Down		BraA03g002650.3C	A03:1163259-1165302	-2.94657	Down
BraA02g004680.3C	A02:2248710-2251098	-2.39771	Down		BraA03g003010.3C	A03:1338618-1339443	-3.89178	Down
BraA02g004730.3C	A02:2289311-2290682	-1.28759	Down		BraA03g004030.3C	A03:1722504-1727675	-3.06793	Down
BraA02g005160.3C	A02:2476507-2478719	-1.15899	Down		BraA03g004490.3C	A03:1925050-1926445	-2.55583	Down
BraA02g005690.3C	A02:2702774-2709723	-0.77076	Down		BraA03g004920.3C	A03:2128562-2132943	-2.2851	Down
BraA02g005940.3C	A02:2820302-2821268	-1.28586	Down		BraA03g005570.3C	A03:2412188-2413511	-2.65906	Down
BraA02g006200.3C	A02:2943691-2944824	-1.41265	Down		BraA03g005630.3C	A03:2446833-2447931	-2.14912	Down
BraA02g006210.3C	A02:2946946-2948161	-1.93254	Down		BraA03g005680.3C	A03:2490197-2495130	-2.18883	Down
BraA02g006230.3C	A02:2963382-2964330	-2.01266	Down		BraA03g006130.3C	A03:2693821-2696586	-2.63515	Down
BraA02g006240.3C	A02:2965465-2971450	-1.55752	Down		BraA03g006540.3C	A03:2826885-2828991	-2.68962	Down
BraA02g006270.3C	A02:2978753-2980497	-1.06404	Down		BraA03g006570.3C	A03:2836372-2838200	-2.07175	Down
BraA02g006300.3C	A02:2986658-2987546	-2.50251	Down		BraA03g006720.3C	A03:2925139-2925487	-3.62536	Down
BraA02g006540.3C	A02:3075618-3081927	-1.61259	Down		BraA03g006800.3C	A03:2946883-2948176	-2.91073	Down
BraA02g006570.3C	A02:3114631-3116649	-1.98561	Down		BraA03g007570.3C	A03:3222367-3225903	-2.34532	Down
BraA02g006830.3C	A02:3242678-3244098	-1.27474	Down		BraA03g007630.3C	A03:3252146-3254816	-3.58888	Down
BraA02g006880.3C	A02:3256632-3257440	-2.06202	Down		BraA03g007900.3C	A03:3385481-3387193	-2.91216	Down
BraA02g006890.3C	A02:3258091-3260391	-1.884	Down		BraA03g007960.3C	A03:3413513-3414125	-3.22624	Down
BraA02g006960.3C	A02:3281588-3283830	-2.71533	Down		BraA03g007980.3C	A03:3423017-3426192	-3.46022	Down
BraA02g007600.3C	A02:3581164-3587089	-1.48385	Down		BraA03g008470.3C	A03:3638480-3641965	-3.6677	Down
BraA02g007790.3C	A02:3649600-3649909	-2.04068	Down		BraA03g008720.3C	A03:3739690-3743895	-6.25616	Down
BraA02g007860.3C	A02:3683945-3688226	-1.0878	Down		BraA03g009410.3C	A03:4041162-4043088	-2.71563	Down
BraA02g008200.3C	A02:3915146-3917695	-1.28437	Down		BraA03g009470.3C	A03:4060504-4061369	-3.53735	Down
BraA02g008610.3C	A02:4072579-4073782	-2.05573	Down		BraA03g009650.3C	A03:4143160-4152969	-2.21721	Down
BraA02g008780.3C	A02:4134767-4137431	-2.59222	Down		BraA03g011020.3C	A03:4757752-4759780	-2.26494	Down
BraA02g008900.3C	A02:4191191-4200604	-1.19904	Down		BraA03g011290.3C	A03:4876406-4877588	-4.58521	Down
BraA02g009050.3C	A02:4253633-4254092	-2.37255	Down		BraA03g011300.3C	A03:4878772-4880078	-2.35873	Down
BraA02g009330.3C	A02:4409123-4411411	-1.37657	Down		BraA03g012220.3C	A03:5221016-5226460	-3.74002	Down
BraA02g009430.3C	A02:4464382-4466213	-1.79545	Down		BraA03g012580.3C	A03:5405808-5407539	-3.55854	Down
BraA02g009570.3C	A02:4557361-4558681	-1.03134	Down		BraA03g012640.3C	A03:5427688-5430279	-2.49394	Down
BraA02g009750.3C	A02:4635203-4635821	-1.07247	Down		BraA03g013200.3C	A03:5749304-5751389	-2.69797	Down
BraA02g010180.3C	A02:4890600-4894285	-0.842465	Down		BraA03g013370.3C	A03:5836474-5838433	-2.21886	Down
BraA02g010250.3C	A02:4970158-4972335	-1.05631	Down		BraA03g014020.3C	A03:6166825-6167764	-2.63055	Down
BraA02g010260.3C	A02:4983256-4985331	-0.932594	Down		BraA03g014080.3C	A03:6217121-6219248	-2.2689	Down
BraA02g010750.3C	A02:5250298-5252589	-1.14436	Down		BraA03g014140.3C	A03:6237118-6237436	No expression in inoculated samples	Down
BraA02g011440.3C	A02:5556988-5558544	-2.06489	Down		BraA03g014150.3C	A03:6237458-6237975	No expression in inoculated samples	Down
BraA02g011450.3C	A02:5559474-5562190	-1.91505	Down		BraA03g014790.3C	A03:6592688-6596924	-2.06514	Down
BraA02g011500.3C	A02:5588743-5591190	-0.944521	Down		BraA03g014800.3C	A03:6600663-6601527	-2.44581	Down
BraA02g012040.3C	A02:5790865-5794471	-1.89238	Down		BraA03g015060.3C	A03:6712082-6713117	No expression in inoculated samples	Down
BraA02g012450.3C	A02:6108363-6110637	-0.766721	Down		BraA03g015510.3C	A03:6932840-6935129	-2.30746	Down
BraA02g012660.3C	A02:6356311-6357932	-4.00897	Down		BraA03g015680.3C	A03:7004713-7009161	-3.10496	Down
BraA02g012840.3C	A02:6462430-6464588	-1.51068	Down		BraA03g015770.3C	A03:7204189-7205686	-2.36902	Down
BraA02g012950.3C	A02:6564575-6567692	-1.24914	Down		BraA03g015970.3C	A03:7347041-7348250	-5.98635	Down
BraA02g013080.3C	A02:6610746-6613824	-1.40636	Down		BraA03g015980.3C	A03:7357621-7359118	-2.41785	Down
BraA02g013130.3C	A02:6635686-6637033	-1.0805	Down		BraA03g016260.3C	A03:7523342-7525239	-2.55404	Down
BraA02g013560.3C	A02:6831071-6836774	-1.76648	Down		BraA03g016310.3C	A03:7543840-7544149	-2.70486	Down
BraA02g013890.3C	A02:7091875-7092542	-1.45936	Down		BraA03g016380.3C	A03:7571342-7572961	-2.39934	Down
BraA02g014010.3C	A02:7180321-7185947	-1.31481	Down		BraA03g016390.3C	A03:7579150-7581486	-3.18445	Down
BraA02g014080.3C	A02:7228940-7233250	-0.954224	Down		BraA03g016540.3C	A03:7650205-7654516	-2.66989	Down
BraA02g014090.3C	A02:7234810-7236336	-1.451	Down		BraA03g017090.3C	A03:7934464-7937252	-3.25534	Down
BraA02g014140.3C	A02:7267117-7268598	-1.36014	Down		BraA03g017360.3C	A03:8065542-8068101	-2.38678	Down
BraA02g014250.3C	A02:7312205-7314398	-3.53818	Down		BraA03g017510.3C	A03:8139615-8140935	-3.14925	Down
BraA02g014330.3C	A02:7366402-7368157	-0.90154	Down		BraA03g017700.3C	A03:8241705-8243362	-2.8646	Down
BraA02g014480.3C	A02:7482148-7482535	-1.78357	Down		BraA03g017780.3C	A03:8274142-8275380	-3.81407	Down
BraA02g014760.3C	A02:7703323-7707611	-0.83022	Down		BraA03g018520.3C	A03:8667949-8681468	-2.62962	Down
BraA02g015030.3C	A02:7833339-7834002	-1.29939	Down		BraA03g018810.3C	A03:8788999-8790229	-5.22694	Down
BraA02g015330.3C	A02:7994746-7997398	-3.0033	Down		BraA03g018880.3C	A03:8852268-8853957	No expression in inoculated samples	Down
BraA02g015540.3C	A02:8158055-8160105	-3.38484	Down		BraA03g019290.3C	A03:9115077-9119820	-2.56948	Down
BraA02g015680.3C	A02:8270610-8272406	-0.852591	Down		BraA03g019360.3C	A03:9156119-9157248	-2.57382	Down
BraA02g015790.3C	A02:8367877-8368891	-0.944093	Down		BraA03g019370.3C	A03:9160840-9162005	-5.59585	Down
BraA02g015830.3C	A02:8408593-8410600	-1.96864	Down		BraA03g019920.3C	A03:9470378-9471577	-2.74487	Down
BraA02g015850.3C	A02:8426122-8429947	-0.926872	Down		BraA03g020140.3C	A03:9612694-9614600	-3.73716	Down
BraA02g016480.3C	A02:8772878-8774704	-1.95679	Down		BraA03g020630.3C	A03:9787193-9789975	-2.51692	Down
BraA02g016760.3C	A02:8944803-8945952	-1.21357	Down		BraA03g020660.3C	A03:9797080-9811852	-2.39955	Down
BraA02g017030.3C	A02:9176577-9178101	-0.856131	Down		BraA03g020830.3C	A03:9930751-9933370	-2.8134	Down
BraA02g017220.3C	A02:9391817-9395793	-0.973364	Down		BraA03g021120.3C	A03:10073255-10077430	-2.12332	Down
BraA02g017270.3C	A02:9424499-9427504	-1.45086	Down		BraA03g021170.3C	A03:10092280-10093555	-6.65474	Down
BraA02g017300.3C	A02:9448740-9451380	-1.45862	Down		BraA03g021280.3C	A03:10170664-10174198	-2.52587	Down
BraA02g017310.3C	A02:9478788-9479598	-1.15122	Down		BraA03g021290.3C	A03:10176685-10178353	-3.73136	Down
BraA02g018330.3C	A02:10215146-10217095	-1.2501	Down		BraA03g021770.3C	A03:10410761-10412189	No expression in inoculated samples	Down
BraA02g018360.3C	A02:10230422-10231328	-2.92441	Down		BraA03g021820.3C	A03:10431020-10433891	-3.21703	Down
BraA02g018420.3C	A02:10307202-10308130	-1.13559	Down		BraA03g023040.3C	A03:11070526-11073491	-2.92139	Down
BraA02g019000.3C	A02:10762213-10763179	-2.12726	Down		BraA03g023750.3C	A03:11396437-11398291	-2.09519	Down
BraA02g019190.3C	A02:10869430-10872324	-1.23406	Down		BraA03g023810.3C	A03:11439300-11440236	-3.21393	Down
BraA02g019240.3C	A02:10935709-10936721	-1.02306	Down		BraA03g024140.3C	A03:11876773-11880382	-3.28511	Down
BraA02g019430.3C	A02:11122665-11131499	-1.67411	Down		BraA03g024570.3C	A03:12073160-12075780	-3.40827	Down
BraA02g019520.3C	A02:11215001-11215780	-2.04645	Down		BraA03g024870.3C	A03:12228411-12234903	-2.37309	Down
BraA02g019870.3C	A02:11446761-11449315	-2.50949	Down		BraA03g025090.3C	A03:12365390-12367361	-3.51836	Down
BraA02g020170.3C	A02:11662179-11667576	-1.04549	Down		BraA03g025350.3C	A03:12492786-12494837	-2.37695	Down
BraA02g020760.3C	A02:12107899-12109835	-1.16787	Down		BraA03g025420.3C	A03:12540595-12542645	No expression in inoculated samples	Down
BraA02g020790.3C	A02:12121642-12123596	-0.870525	Down		BraA03g025460.3C	A03:12566403-12567318	-2.1674	Down
BraA02g022140.3C	A02:12956501-12960242	-1.02155	Down		BraA03g025480.3C	A03:12573527-12574643	-5.04009	Down
BraA02g022460.3C	A02:13127965-13129923	-0.934411	Down		BraA03g025560.3C	A03:12619106-12622123	-2.06749	Down
BraA02g022630.3C	A02:13203419-13203680	No expression in ionculated samples	Down		BraA03g025750.3C	A03:12724800-12725917	-4.62764	Down
BraA02g023230.3C	A02:13615882-13619179	-1.1875	Down		BraA03g025980.3C	A03:12843930-12844701	-2.93197	Down
BraA02g023550.3C	A02:13815066-13818698	-0.918185	Down		BraA03g026420.3C	A03:13052604-13054902	-2.81054	Down
BraA02g023990.3C	A02:14220681-14223537	-1.23395	Down		BraA03g027220.3C	A03:13460208-13462789	-2.19603	Down
BraA02g024090.3C	A02:14278484-14279428	-1.67505	Down		BraA03g027570.3C	A03:13687610-13688856	-2.40783	Down
BraA02g024250.3C	A02:14370510-14374128	-1.34923	Down		BraA03g027760.3C	A03:13827466-13831890	-2.30169	Down
BraA02g024370.3C	A02:14430060-14433186	-1.19212	Down		BraA03g028360.3C	A03:14204947-14205647	-3.83039	Down
BraA02g024390.3C	A02:14455554-14459256	-2.31696	Down		BraA03g028710.3C	A03:14368658-14370969	-5.04587	Down
BraA02g024630.3C	A02:14670120-14672441	-1.23626	Down		BraA03g028990.3C	A03:14514858-14528247	-2.13606	Down
BraA02g024640.3C	A02:14675436-14676852	-0.896756	Down		BraA03g029130.3C	A03:14609594-14609973	-2.5536	Down
BraA02g024660.3C	A02:14684708-14685053	No expression in ionculated samples	Down		BraA03g029190.3C	A03:14653638-14654178	No expression in inoculated samples	Down
BraA02g024720.3C	A02:14734103-14734967	-1.24704	Down		BraA03g029970.3C	A03:15084873-15089121	-2.98986	Down
BraA02g025580.3C	A02:15379040-15380591	-1.70002	Down		BraA03g030250.3C	A03:15229075-15229501	-3.24489	Down
BraA02g025710.3C	A02:15432858-15433285	No expression in ionculated samples	Down		BraA03g030790.3C	A03:15411705-15412071	No expression in inoculated samples	Down
BraA02g026040.3C	A02:15629591-15631870	-1.12863	Down		BraA03g031220.3C	A03:15553153-15555085	-2.1977	Down
BraA02g026330.3C	A02:15779931-15781455	-0.785466	Down		BraA03g031580.3C	A03:15700306-15703033	No expression in inoculated samples	Down
BraA02g026410.3C	A02:15841464-15842877	-0.953303	Down		BraA03g031820.3C	A03:15805366-15805861	No expression in inoculated samples	Down
BraA02g026450.3C	A02:15870142-15871981	-2.40065	Down		BraA03g031850.3C	A03:15819873-15822900	-2.57789	Down
BraA02g026960.3C	A02:16384280-16384784	-1.49025	Down		BraA03g032300.3C	A03:16041756-16042323	-5.03634	Down
BraA02g027010.3C	A02:16411968-16413972	-3.05206	Down		BraA03g032310.3C	A03:16047150-16049573	-2.38193	Down
BraA02g027300.3C	A02:16618963-16620036	-0.894669	Down		BraA03g032350.3C	A03:16065984-16067761	-3.4805	Down
BraA02g027400.3C	A02:16741589-16744077	-1.16074	Down		BraA03g032420.3C	A03:16085723-16089616	-2.16207	Down
BraA02g027860.3C	A02:17201455-17204358	-1.41538	Down		BraA03g032900.3C	A03:16331635-16333915	-2.95745	Down
BraA02g027900.3C	A02:17223841-17226139	-1.04561	Down		BraA03g032960.3C	A03:16355998-16358192	-2.12357	Down
BraA02g028140.3C	A02:17499815-17503970	-0.996916	Down		BraA03g033780.3C	A03:16726185-16726764	No expression in inoculated samples	Down
BraA02g031110.3C	A02:21234638-21237115	-2.4797	Down		BraA03g034970.3C	A03:17274369-17275835	-2.25193	Down
BraA02g031180.3C	A02:21297201-21298400	-1.37312	Down		BraA03g035300.3C	A03:17418237-17419668	-3.81195	Down
BraA02g031210.3C	A02:21317743-21319226	-0.89871	Down		BraA03g035360.3C	A03:17438368-17440713	-2.18155	Down
BraA02g031740.3C	A02:21786319-21789169	-0.812788	Down		BraA03g036130.3C	A03:17852175-17857250	-2.45547	Down
BraA02g031890.3C	A02:21904607-21905786	-1.67298	Down		BraA03g036300.3C	A03:17915057-17916422	-2.16227	Down
BraA02g032180.3C	A02:22169790-22172969	-1.68028	Down		BraA03g036600.3C	A03:18073258-18073729	No expression in inoculated samples	Down
BraA02g032350.3C	A02:22282629-22285814	-1.32429	Down		BraA03g036610.3C	A03:18075919-18078978	-2.57516	Down
BraA02g033680.3C	A02:23417401-23419350	-2.15744	Down		BraA03g036860.3C	A03:18216156-18216792	-2.57658	Down
BraA02g033710.3C	A02:23428416-23429927	-1.92696	Down		BraA03g036990.3C	A03:18294030-18295120	-3.41282	Down
BraA02g034150.3C	A02:23676678-23679172	-1.4853	Down		BraA03g037230.3C	A03:18406445-18412652	-2.26422	Down
BraA02g034530.3C	A02:23856897-23858871	-1.30689	Down		BraA03g037440.3C	A03:18529254-18530573	-3.39294	Down
BraA02g034560.3C	A02:23869137-23869941	-0.815116	Down		BraA03g037500.3C	A03:18555893-18556951	No expression in inoculated samples	Down
BraA02g034730.3C	A02:24030956-24033785	-1.79177	Down		BraA03g038300.3C	A03:18944330-18946189	-3.87672	Down
BraA02g034930.3C	A02:24162722-24163690	-0.835322	Down		BraA03g038540.3C	A03:19068664-19069965	-2.05761	Down
BraA02g034940.3C	A02:24164041-24166367	-0.957225	Down		BraA03g038620.3C	A03:19121464-19122797	-4.4661	Down
BraA02g034990.3C	A02:24215537-24220124	-0.907292	Down		BraA03g038630.3C	A03:19125830-19127164	-3.71126	Down
BraA02g035410.3C	A02:24600042-24602032	-1.17986	Down		BraA03g038910.3C	A03:19264968-19265772	-4.94896	Down
BraA02g035850.3C	A02:24883807-24885142	-0.973579	Down		BraA03g039130.3C	A03:19355752-19362044	-2.19843	Down
BraA02g035890.3C	A02:24905485-24907309	-1.35951	Down		BraA03g039630.3C	A03:19633324-19634017	-4.729	Down
BraA02g036120.3C	A02:25102689-25105086	-1.32915	Down		BraA03g039690.3C	A03:19673326-19676228	-2.84733	Down
BraA02g036470.3C	A02:25374495-25376225	-0.865811	Down		BraA03g039960.3C	A03:19818622-19819967	-3.45156	Down
BraA02g036960.3C	A02:25904800-25906473	-1.79682	Down		BraA03g040590.3C	A03:20207728-20209940	-3.10574	Down
BraA02g036990.3C	A02:25939912-25940392	No expression in ionculated samples	Down		BraA03g040750.3C	A03:20339549-20340730	No expression in inoculated samples	Down
BraA02g037000.3C	A02:25941236-25942774	-1.06481	Down		BraA03g040840.3C	A03:20382130-20383456	-2.33462	Down
BraA02g037030.3C	A02:25955295-25958419	-2.00511	Down		BraA03g041150.3C	A03:20564806-20566286	-2.2774	Down
BraA02g037110.3C	A02:26003741-26005011	-0.878057	Down		BraA03g041280.3C	A03:20701635-20703794	-2.6418	Down
BraA02g037160.3C	A02:26044621-26048832	-0.985634	Down		BraA03g041390.3C	A03:20757100-20765713	-2.23576	Down
BraA02g037240.3C	A02:26116472-26118582	-1.18714	Down		BraA03g042020.3C	A03:21094330-21095114	-3.2409	Down
BraA02g037680.3C	A02:26384868-26386325	-0.847549	Down		BraA03g042150.3C	A03:21153221-21154979	-2.32803	Down
BraA02g038000.3C	A02:26565836-26569467	-1.48879	Down		BraA03g042710.3C	A03:21450847-21452422	-2.07519	Down
BraA02g038290.3C	A02:26733446-26734502	-1.0425	Down		BraA03g043280.3C	A03:21795808-21796755	-2.18058	Down
BraA02g038300.3C	A02:26738513-26739026	-1.1162	Down		BraA03g043640.3C	A03:22020621-22022235	-3.13573	Down
BraA02g038430.3C	A02:26806805-26808195	-2.8963	Down		BraA03g043660.3C	A03:22026561-22043590	-3.03928	Down
BraA02g038530.3C	A02:26851354-26854885	-3.04101	Down		BraA03g044290.3C	A03:22382558-22385753	-2.26663	Down
BraA02g039040.3C	A02:27135835-27138488	-3.11459	Down		BraA03g045310.3C	A03:22944704-22946102	-2.95115	Down
BraA02g039440.3C	A02:27466721-27468403	-0.881479	Down		BraA03g046070.3C	A03:23284604-23285819	-4.58766	Down
BraA02g039780.3C	A02:27675139-27676606	-0.961738	Down		BraA03g046260.3C	A03:23426545-23428018	-5.781	Down
BraA02g040030.3C	A02:27816033-27817167	-1.34082	Down		BraA03g046580.3C	A03:23569764-23572650	-2.58235	Down
BraA02g040040.3C	A02:27819313-27821714	-1.26824	Down		BraA03g047100.3C	A03:23796183-23801179	-2.11095	Down
BraA02g040140.3C	A02:27876285-27880717	-1.27659	Down		BraA03g047160.3C	A03:23832832-23835461	-2.26124	Down
BraA02g040500.3C	A02:28142440-28143869	-1.57244	Down		BraA03g047370.3C	A03:23948758-23950659	-4.37598	Down
BraA02g040970.3C	A02:28429856-28436463	-0.898739	Down		BraA03g047470.3C	A03:23985777-23987426	-2.74634	Down
BraA02g041280.3C	A02:28647987-28652732	-0.815791	Down		BraA03g048600.3C	A03:24682807-24684271	-3.03493	Down
BraA02g041550.3C	A02:28831522-28833374	-1.05918	Down		BraA03g048770.3C	A03:24795508-24799312	-2.55938	Down
BraA02g041840.3C	A02:29005545-29007116	-1.77338	Down		BraA03g048830.3C	A03:24849633-24854201	-2.61164	Down
BraA02g042160.3C	A02:29296208-29300933	-1.78771	Down		BraA03g049670.3C	A03:25372934-25374941	-4.67757	Down
BraA02g042270.3C	A02:29361805-29362997	-1.26788	Down		BraA03g049860.3C	A03:25547959-25559336	-2.14395	Down
BraA02g042710.3C	A02:29647581-29648442	-1.4347	Down		BraA03g049900.3C	A03:25567426-25569010	-4.42246	Down
BraA02g042760.3C	A02:29694495-29701415	-1.21108	Down		BraA03g050630.3C	A03:26015495-26020169	-3.03548	Down
BraA02g042910.3C	A02:29767329-29779772	-0.759718	Down		BraA03g050940.3C	A03:26221597-26224144	-2.5327	Down
BraA02g042970.3C	A02:29804745-29806885	-0.767502	Down		BraA03g051130.3C	A03:26317146-26318283	-2.48906	Down
BraA02g043180.3C	A02:29912673-29913414	-1.65025	Down		BraA03g051420.3C	A03:26517380-26519377	-2.47467	Down
BraA02g043300.3C	A02:29982383-29986296	-1.63962	Down		BraA03g051430.3C	A03:26540044-26540977	-3.32489	Down
BraA02g043500.3C	A02:30129558-30130527	-1.15614	Down		BraA03g052970.3C	A03:27455772-27457256	-3.16746	Down
BraA02g043680.3C	A02:30229402-30230925	-1.6664	Down		BraA03g053740.3C	A03:27814675-27816492	-2.27009	Down
BraA02g043810.3C	A02:30298316-30300687	-1.36383	Down		BraA03g055010.3C	A03:28670836-28672054	-2.65365	Down
BraA02g043990.3C	A02:30409877-30411990	-0.962335	Down		BraA03g055140.3C	A03:28733852-28735400	-4.06072	Down
BraA02g044290.3C	A02:30532542-30533822	-0.899358	Down		BraA03g055250.3C	A03:28814563-28815997	-6.65153	Down
BraA02g044370.3C	A02:30593045-30596167	-1.74599	Down		BraA03g055260.3C	A03:28817655-28822552	-2.48674	Down
BraA02g044480.3C	A02:30647809-30649258	-0.818166	Down		BraA03g055330.3C	A03:28860093-28866999	-2.64276	Down
BraA02g044530.3C	A02:30685637-30687981	-1.25041	Down		BraA03g055590.3C	A03:29050990-29054327	-2.28659	Down
BraA02g044690.3C	A02:30762731-30765600	-0.939532	Down		BraA03g055710.3C	A03:29119700-29122474	-2.26776	Down
BraA02g044820.3C	A02:30821854-30822392	-1.418	Down		BraA03g055840.3C	A03:29224252-29227049	-2.22388	Down
BraA02g045000.3C	A02:30925263-30927609	-0.870229	Down		BraA03g056190.3C	A03:29449428-29451731	-3.01477	Down
BraA02g045270.3C	A02:31077513-31080122	-1.272	Down		BraA03g057480.3C	A03:30202639-30206784	-2.09653	Down
BraA02g045360.3C	A02:31175117-31175438	No expression in ionculated samples	Down		BraA03g057500.3C	A03:30222104-30222812	-3.11459	Down
BraA02g045520.3C	A02:31236002-31236796	-0.813772	Down		BraA03g057730.3C	A03:30345538-30348444	-3.58787	Down
BraA02g045640.3C	A02:31327539-31328824	-1.63901	Down		BraA03g057860.3C	A03:30462302-30463865	-2.82329	Down
BraA03g000150.3C	A03:57308-58725	-0.953334	Down		BraA03g057880.3C	A03:30468750-30471230	-2.40905	Down
BraA03g000230.3C	A03:80864-82391	-0.857869	Down		BraA03g058350.3C	A03:30730521-30732219	-2.62325	Down
BraA03g000530.3C	A03:231997-232823	-1.28498	Down		BraA03g058580.3C	A03:30986153-30987298	-2.08828	Down
BraA03g000690.3C	A03:289621-295364	-1.46653	Down		BraA03g058620.3C	A03:30997946-30999959	-2.31359	Down
BraA03g000990.3C	A03:441954-443725	-1.69162	Down		BraA03g059200.3C	A03:31419392-31420773	-2.11727	Down
BraA03g001150.3C	A03:504693-506263	-1.19163	Down		BraA03g060860.3C	A03:32465997-32467616	-2.71996	Down
BraA03g001180.3C	A03:510486-512241	-1.44822	Down		BraA03g061960.3C	A03:33680286-33684226	-3.27181	Down
BraA03g001290.3C	A03:571402-576692	-0.887678	Down		BraA04g000990.3C	A04:646315-649064	-3.29883	Down
BraA03g001300.3C	A03:579113-583356	-1.7087	Down		BraA04g001900.3C	A04:1175272-1178166	-2.19614	Down
BraA03g001480.3C	A03:692129-693597	No expression in ionculated samples	Down		BraA04g003000.3C	A04:1862230-1862635	-3.13057	Down
BraA03g001880.3C	A03:856336-856827	No expression in ionculated samples	Down		BraA04g003520.3C	A04:2199324-2200417	-2.40167	Down
BraA03g001940.3C	A03:881072-882403	-0.971001	Down		BraA04g003660.3C	A04:2277232-2278391	-3.04484	Down
BraA03g002650.3C	A03:1163259-1165302	-1.57504	Down		BraA04g003720.3C	A04:2294883-2295585	-3.26591	Down
BraA03g003620.3C	A03:1563798-1565341	No expression in ionculated samples	Down		BraA04g003850.3C	A04:2376447-2377989	-2.03468	Down
BraA03g004020.3C	A03:1717123-1718782	-1.3032	Down		BraA04g003910.3C	A04:2410470-2412786	-2.11617	Down
BraA03g004030.3C	A03:1722504-1727675	-1.69564	Down		BraA04g004260.3C	A04:2629699-2632052	-2.60649	Down
BraA03g004100.3C	A03:1746899-1750316	-1.54008	Down		BraA04g004460.3C	A04:2841682-2846005	-2.34998	Down
BraA03g004660.3C	A03:2017388-2019134	No expression in ionculated samples	Down		BraA04g004640.3C	A04:2958098-2958764	-2.32767	Down
BraA03g005570.3C	A03:2412188-2413511	-1.32844	Down		BraA04g006240.3C	A04:4170354-4171728	-2.85626	Down
BraA03g005840.3C	A03:2557477-2562760	-1.02328	Down		BraA04g006280.3C	A04:4207920-4210411	-4.15423	Down
BraA03g005950.3C	A03:2626518-2627725	-1.24233	Down		BraA04g006660.3C	A04:4501596-4504229	-2.53449	Down
BraA03g006130.3C	A03:2693821-2696586	-2.25624	Down		BraA04g006820.3C	A04:4663370-4663754	No expression in inoculated samples	Down
BraA03g006540.3C	A03:2826885-2828991	-0.962794	Down		BraA04g007520.3C	A04:5181100-5181817	-2.28046	Down
BraA03g006670.3C	A03:2888844-2891051	-1.50725	Down		BraA04g008180.3C	A04:5751961-5754688	-2.36479	Down
BraA03g006800.3C	A03:2946883-2948176	-1.99048	Down		BraA04g008230.3C	A04:5816999-5820030	-2.19901	Down
BraA03g006820.3C	A03:2950924-2951809	-1.15803	Down		BraA04g008330.3C	A04:5895163-5898195	-2.0438	Down
BraA03g006830.3C	A03:2953399-2954806	-1.77513	Down		BraA04g008460.3C	A04:5962836-5963889	-3.76296	Down
BraA03g007260.3C	A03:3108538-3112018	-1.31109	Down		BraA04g010190.3C	A04:8039257-8042959	-3.01073	Down
BraA03g007280.3C	A03:3119915-3122146	-1.0249	Down		BraA04g010400.3C	A04:8231050-8232136	-3.07477	Down
BraA03g007340.3C	A03:3142493-3145216	-1.82275	Down		BraA04g012050.3C	A04:9548114-9549925	-2.41514	Down
BraA03g007570.3C	A03:3222367-3225903	-1.20184	Down		BraA04g012060.3C	A04:9562538-9563105	-2.43954	Down
BraA03g007630.3C	A03:3252146-3254816	-1.49828	Down		BraA04g012960.3C	A04:10125914-10129266	-2.87346	Down
BraA03g007900.3C	A03:3385481-3387193	-1.34231	Down		BraA04g013650.3C	A04:10651617-10653551	-2.22282	Down
BraA03g008220.3C	A03:3521735-3526211	-0.79969	Down		BraA04g013670.3C	A04:10662606-10664534	-3.37833	Down
BraA03g008460.3C	A03:3636098-3637929	-1.37246	Down		BraA04g014020.3C	A04:10939391-10952007	-2.11822	Down
BraA03g008470.3C	A03:3638480-3641965	-1.24833	Down		BraA04g014500.3C	A04:11240152-11244134	-2.24333	Down
BraA03g008720.3C	A03:3739690-3743895	-2.67791	Down		BraA04g014560.3C	A04:11298621-11301148	-2.14554	Down
BraA03g009030.3C	A03:3878284-3878831	-1.30491	Down		BraA04g014630.3C	A04:11322545-11323574	-2.24065	Down
BraA03g009290.3C	A03:3986228-3986600	-1.64517	Down		BraA04g014940.3C	A04:11522858-11524253	-2.96363	Down
BraA03g009300.3C	A03:3988190-3989387	-0.819334	Down		BraA04g015230.3C	A04:11725895-11727446	-2.1329	Down
BraA03g009470.3C	A03:4060504-4061369	-1.81602	Down		BraA04g015620.3C	A04:11929089-11932566	-4.39862	Down
BraA03g009610.3C	A03:4126963-4129030	-1.49732	Down		BraA04g016220.3C	A04:12323406-12325463	-4.88146	Down
BraA03g009650.3C	A03:4143160-4152969	-1.00305	Down		BraA04g016480.3C	A04:12523138-12524092	-3.20378	Down
BraA03g009770.3C	A03:4198372-4199793	-1.80262	Down		BraA04g017450.3C	A04:13321507-13326181	-2.21805	Down
BraA03g009800.3C	A03:4206331-4206907	-2.09686	Down		BraA04g018460.3C	A04:13975784-13976930	-2.31216	Down
BraA03g009830.3C	A03:4214962-4218794	-1.21769	Down		BraA04g018630.3C	A04:14101562-14102566	-2.22909	Down
BraA03g010070.3C	A03:4334472-4336326	-1.76141	Down		BraA04g019450.3C	A04:14698299-14699082	-3.97816	Down
BraA03g010870.3C	A03:4696635-4698642	-1.04728	Down		BraA04g019700.3C	A04:14854557-14856571	-4.59482	Down
BraA03g011030.3C	A03:4762804-4764770	-1.75092	Down		BraA04g020950.3C	A04:15764647-15766164	-2.98483	Down
BraA03g011340.3C	A03:4909528-4910988	-1.09611	Down		BraA04g021340.3C	A04:15982746-15983954	-5.05423	Down
BraA03g011950.3C	A03:5141897-5146028	-1.87553	Down		BraA04g021350.3C	A04:15993596-15994940	-4.03896	Down
BraA03g011960.3C	A03:5146418-5148448	-1.00329	Down		BraA04g021600.3C	A04:16178279-16179593	-2.59786	Down
BraA03g012160.3C	A03:5207186-5208392	-2.35207	Down		BraA04g021710.3C	A04:16228816-16230735	-2.82756	Down
BraA03g012200.3C	A03:5216467-5218033	-0.845087	Down		BraA04g022000.3C	A04:16362784-16364470	-4.13513	Down
BraA03g012220.3C	A03:5221016-5226460	-0.982641	Down		BraA04g022790.3C	A04:16826458-16827902	-2.22634	Down
BraA03g012690.3C	A03:5450951-5452013	No expression in ionculated samples	Down		BraA04g023250.3C	A04:17136599-17142492	-2.51386	Down
BraA03g012750.3C	A03:5478718-5482754	-1.14262	Down		BraA04g024620.3C	A04:17846426-17849729	-2.28204	Down
BraA03g012760.3C	A03:5498319-5500054	-2.46201	Down		BraA04g024680.3C	A04:17870081-17871587	-2.03642	Down
BraA03g012770.3C	A03:5501800-5504106	-0.891762	Down		BraA04g024900.3C	A04:17991683-17994736	-2.22443	Down
BraA03g012920.3C	A03:5557587-5558218	-1.67777	Down		BraA04g025550.3C	A04:18292182-18293421	-3.41796	Down
BraA03g013010.3C	A03:5641264-5642401	-0.963605	Down		BraA04g026140.3C	A04:18649635-18650754	-2.91066	Down
BraA03g013080.3C	A03:5692439-5695721	-0.774677	Down		BraA04g026170.3C	A04:18664812-18665985	-2.47952	Down
BraA03g013100.3C	A03:5699234-5703704	-1.14498	Down		BraA04g026260.3C	A04:18730319-18732886	-4.39748	Down
BraA03g013200.3C	A03:5749304-5751389	-2.01807	Down		BraA04g026730.3C	A04:18954839-18960176	-2.63434	Down
BraA03g013370.3C	A03:5836474-5838433	-1.57204	Down		BraA04g027030.3C	A04:19121221-19125090	-2.43063	Down
BraA03g013460.3C	A03:5877553-5880959	-1.03948	Down		BraA04g027070.3C	A04:19131108-19134580	-3.19711	Down
BraA03g013800.3C	A03:6035642-6036905	-0.969595	Down		BraA04g027640.3C	A04:19479348-19484161	-2.11102	Down
BraA03g014020.3C	A03:6166825-6167764	-1.26039	Down		BraA04g027910.3C	A04:19613777-19614869	-2.37663	Down
BraA03g014080.3C	A03:6217121-6219248	-1.9235	Down		BraA04g028930.3C	A04:20137292-20140196	-2.34623	Down
BraA03g014750.3C	A03:6565508-6566317	-0.974621	Down		BraA04g028960.3C	A04:20145020-20147370	-2.47404	Down
BraA03g014790.3C	A03:6592688-6596924	-1.6015	Down		BraA04g029240.3C	A04:20303076-20303724	-2.19318	Down
BraA03g015150.3C	A03:6757873-6759151	-0.828921	Down		BraA04g029580.3C	A04:20470967-20471732	-3.53688	Down
BraA03g015680.3C	A03:7004713-7009161	-1.57425	Down		BraA04g029970.3C	A04:20626383-20628786	-2.71207	Down
BraA03g015720.3C	A03:7184112-7184860	-2.66698	Down		BraA04g030010.3C	A04:20637914-20638649	-2.91483	Down
BraA03g015770.3C	A03:7204189-7205686	-1.91816	Down		BraA04g030680.3C	A04:21014060-21018535	-2.6116	Down
BraA03g015980.3C	A03:7357621-7359118	-1.7127	Down		BraA04g030700.3C	A04:21023465-21026203	-2.40376	Down
BraA03g016100.3C	A03:7422440-7425857	-2.74698	Down		BraA04g031870.3C	A04:21519281-21520731	-2.64076	Down
BraA03g016260.3C	A03:7523342-7525239	-1.43619	Down		BraA04g032100.3C	A04:21617542-21618922	-2.84807	Down
BraA03g016310.3C	A03:7543840-7544149	-1.99667	Down		BraA04g032170.3C	A04:21637353-21638436	-2.65681	Down
BraA03g016340.3C	A03:7556807-7557619	-0.834566	Down		BraA04g032180.3C	A04:21642289-21642691	-2.9627	Down
BraA03g016370.3C	A03:7562166-7568957	-1.5327	Down		BraA05g000490.3C	A05:280140-282020	-2.04531	Down
BraA03g016380.3C	A03:7571342-7572961	-1.01386	Down		BraA05g001200.3C	A05:755701-756874	-2.03305	Down
BraA03g016500.3C	A03:7635205-7640235	-1.29397	Down		BraA05g001370.3C	A05:853108-854850	-2.34653	Down
BraA03g016660.3C	A03:7727354-7728808	-1.42265	Down		BraA05g001510.3C	A05:944766-946937	-2.84136	Down
BraA03g017090.3C	A03:7934464-7937252	-1.65461	Down		BraA05g002590.3C	A05:1449782-1450535	-4.63327	Down
BraA03g017260.3C	A03:8016532-8017174	-1.90934	Down		BraA05g003520.3C	A05:1871700-1872331	-2.83728	Down
BraA03g017480.3C	A03:8122513-8124762	-1.50407	Down		BraA05g005160.3C	A05:2607524-2612457	-2.68266	Down
BraA03g017700.3C	A03:8241705-8243362	-2.04685	Down		BraA05g005380.3C	A05:2733587-2734562	-2.61345	Down
BraA03g017780.3C	A03:8274142-8275380	-3.16993	Down		BraA05g005510.3C	A05:2780207-2784237	-3.32135	Down
BraA03g018050.3C	A03:8424203-8427700	-1.1922	Down		BraA05g005520.3C	A05:2785617-2788368	-2.05614	Down
BraA03g018170.3C	A03:8493482-8494856	-2.14871	Down		BraA05g005580.3C	A05:2802984-2804820	-2.64063	Down
BraA03g018340.3C	A03:8590306-8591620	-3.12563	Down		BraA05g005940.3C	A05:2989854-2991525	-3.33772	Down
BraA03g018520.3C	A03:8667949-8681468	-1.24279	Down		BraA05g006080.3C	A05:3064494-3065751	-5.133	Down
BraA03g018540.3C	A03:8690074-8690471	-2.00226	Down		BraA05g006100.3C	A05:3081480-3082920	-3.06815	Down
BraA03g018680.3C	A03:8733982-8736926	-1.18222	Down		BraA05g006340.3C	A05:3200925-3201951	-3.08821	Down
BraA03g018740.3C	A03:8757587-8759536	-1.49919	Down		BraA05g006650.3C	A05:3387565-3390690	-2.59821	Down
BraA03g018880.3C	A03:8852268-8853957	No expression in ionculated samples	Down		BraA05g007450.3C	A05:3814438-3818295	-2.24957	Down
BraA03g019290.3C	A03:9115077-9119820	-1.3276	Down		BraA05g008320.3C	A05:4290861-4293647	-2.65058	Down
BraA03g019360.3C	A03:9156119-9157248	-2.85904	Down		BraA05g008490.3C	A05:4412894-4414631	-2.98534	Down
BraA03g019370.3C	A03:9160840-9162005	-4.07654	Down		BraA05g009370.3C	A05:4986295-4988667	-3.50121	Down
BraA03g019570.3C	A03:9282947-9285084	-0.844908	Down		BraA05g009420.3C	A05:5011626-5012847	-2.71094	Down
BraA03g019580.3C	A03:9285699-9286011	-1.20484	Down		BraA05g009470.3C	A05:5055479-5056094	No expression in inoculated samples	Down
BraA03g019920.3C	A03:9470378-9471577	-1.98033	Down		BraA05g011280.3C	A05:6055685-6057245	-2.78386	Down
BraA03g020010.3C	A03:9540768-9541392	-1.40095	Down		BraA05g011300.3C	A05:6064664-6066114	-2.3497	Down
BraA03g020300.3C	A03:9665384-9666090	-2.06552	Down		BraA05g011320.3C	A05:6078568-6080986	-2.51979	Down
BraA03g020630.3C	A03:9787193-9789975	-1.01214	Down		BraA05g012680.3C	A05:6891028-6896104	-4.12709	Down
BraA03g020780.3C	A03:9909668-9910139	-2.26305	Down		BraA05g013260.3C	A05:7319202-7320213	-2.91494	Down
BraA03g020850.3C	A03:9941080-9943537	-0.857651	Down		BraA05g013500.3C	A05:7501925-7505729	-2.75262	Down
BraA03g021120.3C	A03:10073255-10077430	-1.37595	Down		BraA05g013580.3C	A05:7572403-7573453	-2.05091	Down
BraA03g021520.3C	A03:10286735-10287789	-1.50893	Down		BraA05g013880.3C	A05:7802339-7809495	-3.40621	Down
BraA03g021530.3C	A03:10288776-10290253	-1.29165	Down		BraA05g013890.3C	A05:7813824-7816830	-2.06028	Down
BraA03g021720.3C	A03:10376482-10379585	-2.51031	Down		BraA05g014220.3C	A05:8041901-8043414	-3.00641	Down
BraA03g021820.3C	A03:10431020-10433891	-2.1531	Down		BraA05g014240.3C	A05:8059214-8060361	-4.70197	Down
BraA03g021890.3C	A03:10486655-10488815	-2.6597	Down		BraA05g014370.3C	A05:8166761-8171574	-2.19624	Down
BraA03g022040.3C	A03:10579601-10591586	-1.46584	Down		BraA05g014900.3C	A05:8482004-8484255	-2.75157	Down
BraA03g022080.3C	A03:10607128-10609565	-1.02834	Down		BraA05g015000.3C	A05:8576224-8577774	-3.57559	Down
BraA03g022270.3C	A03:10703961-10705957	-2.03951	Down		BraA05g016340.3C	A05:9718604-9719171	-2.12735	Down
BraA03g022300.3C	A03:10723899-10727239	-0.929264	Down		BraA05g017440.3C	A05:10513511-10516716	-3.14507	Down
BraA03g023600.3C	A03:11324085-11325903	-1.01416	Down		BraA05g018030.3C	A05:11040568-11042667	No expression in inoculated samples	Down
BraA03g023750.3C	A03:11396437-11398291	-1.31681	Down		BraA05g019040.3C	A05:11942021-11945105	-2.65525	Down
BraA03g024000.3C	A03:11826634-11827919	-1.08002	Down		BraA05g019560.3C	A05:12535588-12536185	No expression in inoculated samples	Down
BraA03g024140.3C	A03:11876773-11880382	-1.08603	Down		BraA05g019570.3C	A05:12536348-12536987	No expression in inoculated samples	Down
BraA03g024290.3C	A03:11954510-11955365	-1.77668	Down		BraA05g020280.3C	A05:13221992-13227058	-2.59164	Down
BraA03g024570.3C	A03:12073160-12075780	-1.84206	Down		BraA05g020770.3C	A05:13755812-13757728	-2.85373	Down
BraA03g024600.3C	A03:12089083-12091207	-1.83752	Down		BraA05g022310.3C	A05:16093122-16094645	No expression in inoculated samples	Down
BraA03g024770.3C	A03:12152737-12154822	-1.72201	Down		BraA05g022470.3C	A05:16251750-16253520	-2.55363	Down
BraA03g024870.3C	A03:12228411-12234903	-0.957286	Down		BraA05g022520.3C	A05:16306634-16307877	No expression in inoculated samples	Down
BraA03g024890.3C	A03:12247729-12248968	-1.04488	Down		BraA05g022890.3C	A05:16684861-16688249	-2.47448	Down
BraA03g024900.3C	A03:12252432-12256822	-1.78499	Down		BraA05g023490.3C	A05:17380155-17384804	-2.17011	Down
BraA03g025350.3C	A03:12492786-12494837	-1.36195	Down		BraA05g024150.3C	A05:17988960-17990229	-4.70604	Down
BraA03g025400.3C	A03:12524318-12525871	-0.912774	Down		BraA05g024300.3C	A05:18111840-18113898	-2.48443	Down
BraA03g025450.3C	A03:12556508-12559726	-1.19411	Down		BraA05g024820.3C	A05:18629243-18634296	-3.00471	Down
BraA03g025480.3C	A03:12573527-12574643	-2.61874	Down		BraA05g025490.3C	A05:19200396-19202444	-4.00795	Down
BraA03g025980.3C	A03:12843930-12844701	-1.39331	Down		BraA05g025550.3C	A05:19259288-19260782	-2.74968	Down
BraA03g026420.3C	A03:13052604-13054902	-2.35579	Down		BraA05g025990.3C	A05:19594105-19594771	-2.60856	Down
BraA03g026570.3C	A03:13147796-13150239	-0.86261	Down		BraA05g026530.3C	A05:19979646-19982847	-2.52008	Down
BraA03g026580.3C	A03:13156671-13158561	-1.01878	Down		BraA05g027490.3C	A05:20596513-20600173	-3.8705	Down
BraA03g026740.3C	A03:13232901-13233846	-1.9107	Down		BraA05g027730.3C	A05:20777048-20777951	-5.61626	Down
BraA03g027110.3C	A03:13427286-13429516	-1.26202	Down		BraA05g027740.3C	A05:20783060-20783864	-3.81478	Down
BraA03g027120.3C	A03:13432460-13433296	-3.07831	Down		BraA05g027760.3C	A05:20799459-20801389	-2.2442	Down
BraA03g027190.3C	A03:13448887-13449232	No expression in ionculated samples	Down		BraA05g028420.3C	A05:21218430-21219675	-2.31748	Down
BraA03g027200.3C	A03:13452431-13452902	No expression in ionculated samples	Down		BraA05g029060.3C	A05:21544798-21550448	-2.47332	Down
BraA03g027210.3C	A03:13453739-13454226	No expression in ionculated samples	Down		BraA05g029990.3C	A05:22061531-22062167	-3.04084	Down
BraA03g027220.3C	A03:13460208-13462789	-1.10926	Down		BraA05g030050.3C	A05:22114184-22117606	-5.22185	Down
BraA03g027520.3C	A03:13638819-13640160	-2.78916	Down		BraA05g030400.3C	A05:22338715-22343927	-2.40563	Down
BraA03g027570.3C	A03:13687610-13688856	-0.879259	Down		BraA05g030960.3C	A05:22724489-22725983	-3.36336	Down
BraA03g027960.3C	A03:13950520-13950922	-3.83994	Down		BraA05g031680.3C	A05:23139734-23141631	-2.86888	Down
BraA03g028060.3C	A03:14017950-14018292	No expression in ionculated samples	Down		BraA05g031830.3C	A05:23187197-23190113	-3.01472	Down
BraA03g028460.3C	A03:14247796-14252722	-1.15623	Down		BraA05g031950.3C	A05:23258964-23259590	-3.70574	Down
BraA03g028510.3C	A03:14280386-14281605	-1.68997	Down		BraA05g032350.3C	A05:23489076-23490670	-3.26168	Down
BraA03g028530.3C	A03:14290298-14294007	-1.13237	Down		BraA05g032400.3C	A05:23510489-23512742	-4.51551	Down
BraA03g028660.3C	A03:14344788-14345920	-1.24504	Down		BraA05g032580.3C	A05:23588185-23592415	-2.702	Down
BraA03g028710.3C	A03:14368658-14370969	-3.60023	Down		BraA05g032610.3C	A05:23617141-23618935	-4.59609	Down
BraA03g028720.3C	A03:14375893-14380822	-0.949553	Down		BraA05g032830.3C	A05:23734635-23736368	-3.71069	Down
BraA03g028990.3C	A03:14514858-14528247	-1.04385	Down		BraA05g033590.3C	A05:24135552-24135738	-2.72873	Down
BraA03g029130.3C	A03:14609594-14609973	-1.96618	Down		BraA05g034040.3C	A05:24354667-24355849	-2.88101	Down
BraA03g029190.3C	A03:14653638-14654178	No expression in ionculated samples	Down		BraA05g034160.3C	A05:24427999-24429182	-2.86337	Down
BraA03g029380.3C	A03:14766021-14768064	-3.84072	Down		BraA05g034790.3C	A05:24684603-24685758	-3.36268	Down
BraA03g029620.3C	A03:14906771-14908613	-2.53409	Down		BraA05g036930.3C	A05:25607142-25609076	-2.5795	Down
BraA03g029630.3C	A03:14912681-14913371	-1.86798	Down		BraA05g037570.3C	A05:25870228-25872062	-2.58724	Down
BraA03g029970.3C	A03:15084873-15089121	-1.09157	Down		BraA05g037890.3C	A05:26010479-26011029	No expression in inoculated samples	Down
BraA03g029980.3C	A03:15090799-15093460	-1.08615	Down		BraA05g037920.3C	A05:26019018-26020467	-2.32117	Down
BraA03g030180.3C	A03:15194286-15197270	-0.917856	Down		BraA05g039480.3C	A05:26926462-26926737	-4.37627	Down
BraA03g030260.3C	A03:15230230-15231354	-1.52207	Down		BraA05g039550.3C	A05:26974710-26975316	-4.14752	Down
BraA03g030440.3C	A03:15280059-15281958	-1.86255	Down		BraA05g039760.3C	A05:27079526-27079886	-2.16284	Down
BraA03g030450.3C	A03:15282774-15285812	-0.822867	Down		BraA05g041030.3C	A05:27694473-27695651	-2.15839	Down
BraA03g030650.3C	A03:15362999-15366127	-1.28093	Down		BraA05g041150.3C	A05:27750634-27767704	-2.41959	Down
BraA03g030720.3C	A03:15386565-15389019	-1.3244	Down		BraA05g042090.3C	A05:28178692-28183083	-2.23507	Down
BraA03g030770.3C	A03:15403243-15404065	-1.59294	Down		BraA05g042300.3C	A05:28280342-28282106	-2.66952	Down
BraA03g030910.3C	A03:15461935-15462718	-3.4763	Down		BraA05g042400.3C	A05:28355930-28359857	-2.11467	Down
BraA03g031100.3C	A03:15514718-15516638	-3.04466	Down		BraA06g000210.3C	A06:188867-190240	-2.18377	Down
BraA03g031130.3C	A03:15523662-15525740	-0.914619	Down		BraA06g001080.3C	A06:694455-695061	-2.92469	Down
BraA03g031160.3C	A03:15533318-15534833	-1.15297	Down		BraA06g002720.3C	A06:1620354-1623591	-2.26837	Down
BraA03g031410.3C	A03:15628000-15631050	-0.876425	Down		BraA06g003120.3C	A06:1831587-1834146	-2.22539	Down
BraA03g031900.3C	A03:15842783-15846491	-0.83073	Down		BraA06g003150.3C	A06:1844073-1846689	-2.63063	Down
BraA03g032300.3C	A03:16041756-16042323	-2.55587	Down		BraA06g003430.3C	A06:2072094-2074650	-2.27096	Down
BraA03g032310.3C	A03:16047150-16049573	-1.57981	Down		BraA06g003770.3C	A06:2246939-2249504	-2.41975	Down
BraA03g032350.3C	A03:16065984-16067761	-2.70928	Down		BraA06g004310.3C	A06:2576699-2578019	-3.2528	Down
BraA03g032900.3C	A03:16331635-16333915	-2.18816	Down		BraA06g004320.3C	A06:2580704-2581142	No expression in inoculated samples	Down
BraA03g033280.3C	A03:16493636-16494101	-1.5658	Down		BraA06g004620.3C	A06:2719087-2724476	-2.98277	Down
BraA03g033320.3C	A03:16508735-16510292	-0.773902	Down		BraA06g004790.3C	A06:2808160-2810830	-2.45014	Down
BraA03g033640.3C	A03:16665608-16667455	-1.37631	Down		BraA06g005660.3C	A06:3324019-3325584	-2.48527	Down
BraA03g034080.3C	A03:16864629-16870915	-0.885694	Down		BraA06g005870.3C	A06:3429361-3432321	-3.0328	Down
BraA03g034100.3C	A03:16873823-16876837	-0.999592	Down		BraA06g006060.3C	A06:3519634-3521596	-2.23178	Down
BraA03g034420.3C	A03:17010244-17015340	-0.727154	Down		BraA06g006390.3C	A06:3650218-3652314	-2.35618	Down
BraA03g034680.3C	A03:17131459-17133727	-0.759469	Down		BraA06g007410.3C	A06:4111030-4113118	-2.2905	Down
BraA03g034810.3C	A03:17195951-17197321	-2.83646	Down		BraA06g007530.3C	A06:4155837-4158342	-3.56982	Down
BraA03g035250.3C	A03:17398165-17399391	-2.15618	Down		BraA06g007550.3C	A06:4174414-4175584	-2.51393	Down
BraA03g035760.3C	A03:17648689-17654002	-1.33097	Down		BraA06g007690.3C	A06:4241730-4243792	-4.74729	Down
BraA03g036040.3C	A03:17805737-17809289	-0.772962	Down		BraA06g008610.3C	A06:4733681-4736910	-2.28164	Down
BraA03g036100.3C	A03:17838235-17840634	-0.980825	Down		BraA06g009090.3C	A06:4944110-4944731	No expression in inoculated samples	Down
BraA03g036160.3C	A03:17862726-17867799	-1.01125	Down		BraA06g009200.3C	A06:5011288-5014034	-4.59068	Down
BraA03g036170.3C	A03:17870024-17871187	No expression in ionculated samples	Down		BraA06g009240.3C	A06:5048278-5050859	-3.40395	Down
BraA03g036300.3C	A03:17915057-17916422	-1.80561	Down		BraA06g009560.3C	A06:5223711-5225239	-4.42279	Down
BraA03g036610.3C	A03:18075919-18078978	-1.68554	Down		BraA06g010390.3C	A06:5640072-5641212	-2.01853	Down
BraA03g037170.3C	A03:18378348-18382677	-1.28026	Down		BraA06g010480.3C	A06:5682925-5686062	-2.6209	Down
BraA03g037230.3C	A03:18406445-18412652	-0.825267	Down		BraA06g010630.3C	A06:5767882-5771538	-2.36324	Down
BraA03g037440.3C	A03:18529254-18530573	-3.82816	Down		BraA06g010900.3C	A06:5915726-5918238	-2.66814	Down
BraA03g037610.3C	A03:18632167-18633145	-1.2089	Down		BraA06g011160.3C	A06:6043730-6044192	-3.14768	Down
BraA03g037930.3C	A03:18754141-18755967	-1.45403	Down		BraA06g011510.3C	A06:6185440-6186205	-2.65596	Down
BraA03g037940.3C	A03:18756695-18759365	-0.915905	Down		BraA06g012360.3C	A06:6588158-6589851	No expression in inoculated samples	Down
BraA03g038010.3C	A03:18799577-18800476	-1.39748	Down		BraA06g013020.3C	A06:6894763-6898624	-2.54692	Down
BraA03g038120.3C	A03:18861090-18862672	-1.5291	Down		BraA06g013040.3C	A06:6905184-6909079	-2.15776	Down
BraA03g038300.3C	A03:18944330-18946189	-1.1637	Down		BraA06g013340.3C	A06:7035988-7036762	-2.19137	Down
BraA03g038510.3C	A03:19055506-19057902	-2.31043	Down		BraA06g013910.3C	A06:7340452-7341205	-2.17407	Down
BraA03g038540.3C	A03:19068664-19069965	-1.24147	Down		BraA06g014030.3C	A06:7418912-7420371	-3.35166	Down
BraA03g038600.3C	A03:19112151-19113531	-1.83361	Down		BraA06g014350.3C	A06:7641542-7644232	-2.58225	Down
BraA03g038660.3C	A03:19142131-19142314	No expression in ionculated samples	Down		BraA06g014370.3C	A06:7653069-7654212	-4.84602	Down
BraA03g039380.3C	A03:19493651-19495926	-1.10849	Down		BraA06g014960.3C	A06:7969017-7970120	-2.26786	Down
BraA03g039630.3C	A03:19633324-19634017	-2.76454	Down		BraA06g015080.3C	A06:8081462-8083565	-4.59357	Down
BraA03g039960.3C	A03:19818622-19819967	-3.18423	Down		BraA06g015240.3C	A06:8150654-8152433	-2.83213	Down
BraA03g040550.3C	A03:20183467-20184573	-1.15056	Down		BraA06g015400.3C	A06:8259753-8262934	-3.22935	Down
BraA03g040590.3C	A03:20207728-20209940	-1.07111	Down		BraA06g015640.3C	A06:8473746-8474331	-3.54609	Down
BraA03g041170.3C	A03:20602058-20604329	-0.763295	Down		BraA06g015660.3C	A06:8490150-8491480	-2.09394	Down
BraA03g042020.3C	A03:21094330-21095114	-3.40664	Down		BraA06g015970.3C	A06:8675000-8676312	-2.998	Down
BraA03g042080.3C	A03:21118956-21121630	-1.04181	Down		BraA06g016260.3C	A06:8865365-8865974	-2.35437	Down
BraA03g042150.3C	A03:21153221-21154979	-2.40232	Down		BraA06g016510.3C	A06:9027818-9028964	-2.11006	Down
BraA03g042280.3C	A03:21207496-21208766	-1.29568	Down		BraA06g016930.3C	A06:9336747-9337979	-2.58251	Down
BraA03g042710.3C	A03:21450847-21452422	-1.2094	Down		BraA06g017590.3C	A06:9730945-9731239	-3.78548	Down
BraA03g042800.3C	A03:21509004-21512108	-0.779151	Down		BraA06g017650.3C	A06:9749982-9751795	-2.92301	Down
BraA03g043640.3C	A03:22020621-22022235	-1.58014	Down		BraA06g019390.3C	A06:11073294-11076417	-2.16365	Down
BraA03g045130.3C	A03:22766341-22767489	-0.81694	Down		BraA06g020070.3C	A06:11537447-11538612	-2.27094	Down
BraA03g046260.3C	A03:23426545-23428018	-2.73715	Down		BraA06g020250.3C	A06:11652716-11653838	-4.06248	Down
BraA03g046310.3C	A03:23451391-23453469	-0.985204	Down		BraA06g020400.3C	A06:11804484-11806986	-2.37288	Down
BraA03g046320.3C	A03:23453503-23454258	-0.904511	Down		BraA06g020530.3C	A06:11918376-11919270	-2.06538	Down
BraA03g046350.3C	A03:23479575-23480804	-2.12907	Down		BraA06g021620.3C	A06:12936182-12936998	-3.19458	Down
BraA03g046480.3C	A03:23519797-23523498	-0.805331	Down		BraA06g023430.3C	A06:16000572-16000971	-2.27327	Down
BraA03g046580.3C	A03:23569764-23572650	-2.15734	Down		BraA06g024960.3C	A06:17386907-17391436	-2.68199	Down
BraA03g046740.3C	A03:23663941-23664610	-0.928317	Down		BraA06g025490.3C	A06:17800739-17801741	-3.5445	Down
BraA03g047360.3C	A03:23938291-23942349	-1.41583	Down		BraA06g025760.3C	A06:18080801-18086157	-2.94891	Down
BraA03g047370.3C	A03:23948758-23950659	-2.56212	Down		BraA06g026170.3C	A06:18339920-18342285	-3.6769	Down
BraA03g047460.3C	A03:23981986-23984106	-1.02409	Down		BraA06g026180.3C	A06:18344839-18346941	-2.13468	Down
BraA03g047470.3C	A03:23985777-23987426	-2.39798	Down		BraA06g026710.3C	A06:18735734-18736431	-3.18587	Down
BraA03g047970.3C	A03:24262478-24265513	-1.21747	Down		BraA06g027760.3C	A06:19354822-19357573	-2.52987	Down
BraA03g048050.3C	A03:24326531-24327712	-1.06452	Down		BraA06g028100.3C	A06:19534807-19536067	-3.33246	Down
BraA03g048600.3C	A03:24682807-24684271	-1.52195	Down		BraA06g029160.3C	A06:20217294-20219510	-2.83503	Down
BraA03g048830.3C	A03:24849633-24854201	-0.775559	Down		BraA06g029380.3C	A06:20369851-20371744	-2.94474	Down
BraA03g048880.3C	A03:24870935-24872247	-1.62162	Down		BraA06g029580.3C	A06:20427141-20430512	-3.38705	Down
BraA03g048960.3C	A03:24926684-24928220	-1.00045	Down		BraA06g031510.3C	A06:21712322-21716584	-3.40458	Down
BraA03g049460.3C	A03:25232118-25233817	-1.72626	Down		BraA06g031670.3C	A06:21809336-21811920	-2.31315	Down
BraA03g049720.3C	A03:25423650-25427184	-1.06255	Down		BraA06g032020.3C	A06:22031593-22031875	-4.14635	Down
BraA03g049740.3C	A03:25438031-25440026	-1.74045	Down		BraA06g032290.3C	A06:22216433-22217315	-3.98647	Down
BraA03g049860.3C	A03:25547959-25559336	-1.13594	Down		BraA06g032310.3C	A06:22220224-22221073	-3.6543	Down
BraA03g049900.3C	A03:25567426-25569010	-1.39066	Down		BraA06g032950.3C	A06:22562557-22563232	-2.82639	Down
BraA03g050630.3C	A03:26015495-26020169	-1.07506	Down		BraA06g033140.3C	A06:22658302-22661082	-2.87548	Down
BraA03g050940.3C	A03:26221597-26224144	-1.59242	Down		BraA06g033510.3C	A06:22891565-22893503	-2.11179	Down
BraA03g050980.3C	A03:26240028-26243721	-1.2391	Down		BraA06g033590.3C	A06:22939745-22942232	-2.02573	Down
BraA03g051030.3C	A03:26265266-26266388	-1.41946	Down		BraA06g034310.3C	A06:23339301-23340183	-3.62437	Down
BraA03g051420.3C	A03:26517380-26519377	-2.06265	Down		BraA06g034790.3C	A06:23626931-23629747	-6.54699	Down
BraA03g051430.3C	A03:26540044-26540977	-2.23306	Down		BraA06g035270.3C	A06:23877066-23879137	-7.02951	Down
BraA03g052180.3C	A03:26960278-26964392	-2.06687	Down		BraA06g035430.3C	A06:23934834-23935706	-2.57581	Down
BraA03g052720.3C	A03:27294824-27296755	-1.2586	Down		BraA06g035490.3C	A06:23953300-23956096	-3.13738	Down
BraA03g052970.3C	A03:27455772-27457256	-2.17552	Down		BraA06g035990.3C	A06:24182286-24187760	-2.29894	Down
BraA03g053230.3C	A03:27588376-27589971	-1.10568	Down		BraA06g036760.3C	A06:24665305-24671493	-3.01648	Down
BraA03g053470.3C	A03:27681746-27683714	-0.714433	Down		BraA06g037150.3C	A06:24828082-24829174	-4.71529	Down
BraA03g053620.3C	A03:27758287-27758989	-1.4841	Down		BraA06g037520.3C	A06:25064740-25066282	-3.19998	Down
BraA03g053630.3C	A03:27761835-27763598	-1.05498	Down		BraA06g037550.3C	A06:25088992-25091439	-2.05638	Down
BraA03g054660.3C	A03:28412132-28413369	-1.36269	Down		BraA06g037830.3C	A06:25231900-25234792	-2.71523	Down
BraA03g054840.3C	A03:28503329-28503752	-1.54183	Down		BraA06g037880.3C	A06:25257953-25258949	-2.53932	Down
BraA03g055010.3C	A03:28670836-28672054	-1.16483	Down		BraA06g037970.3C	A06:25284813-25287050	-2.5289	Down
BraA03g055140.3C	A03:28733852-28735400	-2.02005	Down		BraA06g038130.3C	A06:25368384-25370015	-2.84205	Down
BraA03g055410.3C	A03:28915023-28917237	-2.51982	Down		BraA06g038680.3C	A06:25726811-25731138	-2.03598	Down
BraA03g055590.3C	A03:29050990-29054327	-0.756493	Down		BraA06g038800.3C	A06:25834479-25835779	-2.15695	Down
BraA03g055630.3C	A03:29074659-29075451	-1.45699	Down		BraA06g039140.3C	A06:26091532-26091742	No expression in inoculated samples	Down
BraA03g055710.3C	A03:29119700-29122474	-1.63825	Down		BraA06g040070.3C	A06:26644481-26648928	-2.53602	Down
BraA03g055800.3C	A03:29210246-29213011	-1.84431	Down		BraA06g041220.3C	A06:27216434-27217322	-3.52099	Down
BraA03g055840.3C	A03:29224252-29227049	-0.785755	Down		BraA06g041390.3C	A06:27313573-27320830	-3.57915	Down
BraA03g055990.3C	A03:29325729-29328641	-1.46769	Down		BraA06g041630.3C	A06:27417528-27418662	-2.75599	Down
BraA03g056410.3C	A03:29607480-29609667	-2.15971	Down		BraA06g041840.3C	A06:27538535-27544182	-2.64325	Down
BraA03g056430.3C	A03:29617881-29619198	-0.892715	Down		BraA06g041980.3C	A06:27604599-27606996	-3.49164	Down
BraA03g057030.3C	A03:29927559-29928931	-1.30435	Down		BraA06g043040.3C	A06:28159250-28161298	-3.34717	Down
BraA03g057480.3C	A03:30202639-30206784	-1.00236	Down		BraA06g043600.3C	A06:28444323-28447165	-2.66656	Down
BraA03g057730.3C	A03:30345538-30348444	-4.55122	Down		BraA06g043640.3C	A06:28477229-28479872	-3.25125	Down
BraA03g057880.3C	A03:30468750-30471230	-1.5584	Down		BraA06g044120.3C	A06:28715649-28716751	-2.99016	Down
BraA03g058580.3C	A03:30986153-30987298	-1.03937	Down		BraA06g044170.3C	A06:28734609-28741311	-2.06063	Down
BraA03g058710.3C	A03:31094935-31096779	-1.51754	Down		BraA06g044370.3C	A06:28889050-28890462	-2.52398	Down
BraA03g058720.3C	A03:31099416-31102237	-1.04299	Down		BraA06g044510.3C	A06:28935310-28941466	-2.74356	Down
BraA03g058930.3C	A03:31240387-31242515	-0.962775	Down		BraA06g044720.3C	A06:29015609-29018333	-2.87096	Down
BraA03g058940.3C	A03:31245988-31248422	-0.956494	Down		BraA06g044830.3C	A06:29058665-29060867	-2.73911	Down
BraA03g059200.3C	A03:31419392-31420773	-1.99514	Down		BraA07g000490.3C	A07:240684-245024	-2.85958	Down
BraA03g060140.3C	A03:31984200-31985899	-2.84411	Down		BraA07g001140.3C	A07:799922-803290	-3.65901	Down
BraA03g060480.3C	A03:32198079-32198988	-2.48328	Down		BraA07g002180.3C	A07:1645118-1646594	-2.19412	Down
BraA03g060490.3C	A03:32201729-32203137	-0.972513	Down		BraA07g003670.3C	A07:2796638-2797070	-2.58427	Down
BraA03g060690.3C	A03:32347661-32348510	-1.17427	Down		BraA07g003930.3C	A07:3006638-3009789	-2.03142	Down
BraA03g060720.3C	A03:32354953-32356783	-0.946244	Down		BraA07g004260.3C	A07:3249298-3256151	-3.33176	Down
BraA03g060860.3C	A03:32465997-32467616	-1.06242	Down		BraA07g004350.3C	A07:3313099-3315890	-3.31046	Down
BraA03g060890.3C	A03:32507586-32508978	-1.33954	Down		BraA07g004820.3C	A07:3667233-3668516	-2.57421	Down
BraA03g061060.3C	A03:32627318-32628369	-0.889864	Down		BraA07g004910.3C	A07:3764131-3777702	-2.45517	Down
BraA03g061270.3C	A03:32819501-32820798	-1.34655	Down		BraA07g005280.3C	A07:4115948-4116927	-2.78803	Down
BraA03g061580.3C	A03:33082590-33090814	-0.986286	Down		BraA07g005530.3C	A07:4427497-4428883	-3.1608	Down
BraA03g061620.3C	A03:33142826-33144698	-0.913551	Down		BraA07g007020.3C	A07:7331666-7334119	-2.36922	Down
BraA03g061960.3C	A03:33680286-33684226	-2.15762	Down		BraA07g007770.3C	A07:7953482-7954803	-3.27157	Down
BraA03g062910.3C	A03:35191490-35192681	-2.36882	Down		BraA07g008030.3C	A07:8145281-8147911	-3.74622	Down
BraA03g063030.3C	A03:35451659-35455944	-0.752442	Down		BraA07g008090.3C	A07:8188273-8197053	-2.28198	Down
BraA03g064230.3C	A03:36684868-36687161	-0.909441	Down		BraA07g008300.3C	A07:8360669-8361473	-4.89291	Down
BraA04g000720.3C	A04:443897-444869	-0.8992	Down		BraA07g008530.3C	A07:8549179-8551712	-2.03309	Down
BraA04g000900.3C	A04:540833-541796	-1.83327	Down		BraA07g008560.3C	A07:8591297-8592262	-2.7005	Down
BraA04g001920.3C	A04:1182751-1184392	-1.40929	Down		BraA07g008580.3C	A07:8605022-8605469	-3.07812	Down
BraA04g002090.3C	A04:1290180-1292354	-1.26229	Down		BraA07g008720.3C	A07:8720557-8723861	-3.54409	Down
BraA04g002310.3C	A04:1408905-1409555	-3.08733	Down		BraA07g008790.3C	A07:8816877-8818132	No expression in inoculated samples	Down
BraA04g002400.3C	A04:1457361-1460337	-0.995458	Down		BraA07g008810.3C	A07:8845944-8848707	-3.25357	Down
BraA04g002990.3C	A04:1852720-1853206	-3.37395	Down		BraA07g009680.3C	A07:9674537-9677760	-2.13667	Down
BraA04g003520.3C	A04:2199324-2200417	-2.275	Down		BraA07g010520.3C	A07:10388797-10394615	-2.07496	Down
BraA04g003770.3C	A04:2319379-2320541	-1.03731	Down		BraA07g011610.3C	A07:11350238-11353431	-2.25228	Down
BraA04g003850.3C	A04:2376447-2377989	-1.30025	Down		BraA07g011650.3C	A07:11386189-11386696	-3.27105	Down
BraA04g003910.3C	A04:2410470-2412786	-1.38251	Down		BraA07g011930.3C	A07:11613310-11617970	-3.3785	Down
BraA04g004260.3C	A04:2629699-2632052	-2.15877	Down		BraA07g012270.3C	A07:11802022-11808877	-3.06338	Down
BraA04g004380.3C	A04:2696277-2698495	-0.943918	Down		BraA07g012360.3C	A07:11854262-11857176	-3.64606	Down
BraA04g004460.3C	A04:2841682-2846005	-1.68291	Down		BraA07g012620.3C	A07:12028735-12031286	-3.24901	Down
BraA04g004490.3C	A04:2861455-2862379	-1.14189	Down		BraA07g012780.3C	A07:12114045-12114912	-2.82523	Down
BraA04g004890.3C	A04:3148832-3151192	-1.51348	Down		BraA07g014390.3C	A07:13121988-13124153	-3.35856	Down
BraA04g005190.3C	A04:3383743-3387400	-0.921885	Down		BraA07g015530.3C	A07:13941696-13942287	No expression in inoculated samples	Down
BraA04g005840.3C	A04:3862138-3866322	-1.26922	Down		BraA07g015910.3C	A07:14111586-14112505	-2.33177	Down
BraA04g006240.3C	A04:4170354-4171728	-1.14109	Down		BraA07g016000.3C	A07:14171313-14171895	-3.61073	Down
BraA04g006270.3C	A04:4184259-4195079	-1.34551	Down		BraA07g016670.3C	A07:14617048-14618272	-2.37393	Down
BraA04g006280.3C	A04:4207920-4210411	-2.69704	Down		BraA07g016800.3C	A07:14696515-14697669	-2.51137	Down
BraA04g006660.3C	A04:4501596-4504229	-1.51592	Down		BraA07g017300.3C	A07:14991710-14992776	-3.55861	Down
BraA04g007050.3C	A04:4832219-4834003	-0.858544	Down		BraA07g017760.3C	A07:15230563-15235850	-2.87228	Down
BraA04g007520.3C	A04:5181100-5181817	-2.35505	Down		BraA07g018270.3C	A07:15582608-15584102	-4.84776	Down
BraA04g008230.3C	A04:5816999-5820030	-1.84393	Down		BraA07g018410.3C	A07:15645148-15648445	-2.05646	Down
BraA04g008330.3C	A04:5895163-5898195	-1.5767	Down		BraA07g018590.3C	A07:15799320-15800187	-2.32326	Down
BraA04g008460.3C	A04:5962836-5963889	-2.55096	Down		BraA07g018980.3C	A07:16109166-16111703	-3.40638	Down
BraA04g008780.3C	A04:6166388-6169662	-0.866808	Down		BraA07g019430.3C	A07:16405119-16407098	-2.62339	Down
BraA04g008800.3C	A04:6182983-6185724	-2.06673	Down		BraA07g020350.3C	A07:16928789-16931866	-2.29234	Down
BraA04g008820.3C	A04:6223251-6225612	-1.41884	Down		BraA07g020640.3C	A07:17112795-17114532	-2.55604	Down
BraA04g008920.3C	A04:6344629-6346455	-1.01711	Down		BraA07g020650.3C	A07:17116935-17121824	-2.5278	Down
BraA04g009490.3C	A04:7257905-7259776	-0.937054	Down		BraA07g020810.3C	A07:17210560-17211659	-4.8525	Down
BraA04g009500.3C	A04:7263163-7267091	-0.973941	Down		BraA07g020910.3C	A07:17266422-17266986	-2.73725	Down
BraA04g009610.3C	A04:7384258-7387792	-0.741828	Down		BraA07g021740.3C	A07:17675523-17677364	-3.95676	Down
BraA04g009800.3C	A04:7671577-7675335	-1.1507	Down		BraA07g021920.3C	A07:17772544-17774970	-2.39076	Down
BraA04g009910.3C	A04:7771288-7773317	-1.09384	Down		BraA07g022350.3C	A07:18028114-18028973	-2.56014	Down
BraA04g010190.3C	A04:8039257-8042959	-1.5318	Down		BraA07g023180.3C	A07:18510487-18512302	-2.67787	Down
BraA04g010230.3C	A04:8061032-8063434	-0.943781	Down		BraA07g023610.3C	A07:18759718-18763240	-2.41335	Down
BraA04g010400.3C	A04:8231050-8232136	-1.45082	Down		BraA07g023960.3C	A07:18901580-18905112	-2.78106	Down
BraA04g012050.3C	A04:9548114-9549925	-1.13841	Down		BraA07g024030.3C	A07:18926617-18932854	-2.19403	Down
BraA04g012640.3C	A04:9922908-9924597	-1.23066	Down		BraA07g024320.3C	A07:19101562-19102075	-3.05898	Down
BraA04g013070.3C	A04:10250808-10252260	-1.30333	Down		BraA07g025870.3C	A07:19844464-19847675	-2.16277	Down
BraA04g013090.3C	A04:10261395-10262253	-1.05845	Down		BraA07g026310.3C	A07:20079603-20081653	-3.16197	Down
BraA04g013220.3C	A04:10337122-10341836	-1.60812	Down		BraA07g026780.3C	A07:20299689-20300646	-3.39649	Down
BraA04g013420.3C	A04:10529573-10533104	-1.41796	Down		BraA07g027010.3C	A07:20453825-20460875	-2.96129	Down
BraA04g013660.3C	A04:10654483-10655756	-1.59395	Down		BraA07g027760.3C	A07:20897899-20899529	-3.23739	Down
BraA04g013670.3C	A04:10662606-10664534	-1.3787	Down		BraA07g028030.3C	A07:21032725-21033310	-4.79303	Down
BraA04g014020.3C	A04:10939391-10952007	-1.22444	Down		BraA07g028110.3C	A07:21058634-21061121	-2.28069	Down
BraA04g014030.3C	A04:10952098-10953775	-1.39952	Down		BraA07g028190.3C	A07:21117092-21118376	-2.20063	Down
BraA04g014540.3C	A04:11279573-11282969	-2.19125	Down		BraA07g028600.3C	A07:21274359-21277308	-3.08648	Down
BraA04g014560.3C	A04:11298621-11301148	-0.882724	Down		BraA07g028720.3C	A07:21328370-21331027	-2.93114	Down
BraA04g014740.3C	A04:11368729-11370238	-1.34794	Down		BraA07g028930.3C	A07:21411207-21414382	-3.64801	Down
BraA04g014940.3C	A04:11522858-11524253	-1.71057	Down		BraA07g030330.3C	A07:22191928-22193642	-2.99159	Down
BraA04g015620.3C	A04:11929089-11932566	-1.7089	Down		BraA07g030350.3C	A07:22201400-22210761	-3.3173	Down
BraA04g015750.3C	A04:11999963-12002629	-1.85497	Down		BraA07g030370.3C	A07:22224667-22227518	-2.2574	Down
BraA04g015930.3C	A04:12126063-12127570	-1.96997	Down		BraA07g030600.3C	A07:22385856-22390314	-2.33546	Down
BraA04g016220.3C	A04:12323406-12325463	-1.72324	Down		BraA07g030620.3C	A07:22391693-22394242	-2.52319	Down
BraA04g016370.3C	A04:12409064-12410209	-2.11069	Down		BraA07g030920.3C	A07:22566235-22568196	-2.26661	Down
BraA04g016810.3C	A04:12795853-12796875	-1.03124	Down		BraA07g031010.3C	A07:22625212-22630264	-4.04582	Down
BraA04g017350.3C	A04:13212325-13214558	-1.9826	Down		BraA07g031300.3C	A07:22785671-22785902	-2.88588	Down
BraA04g017450.3C	A04:13321507-13326181	-1.02814	Down		BraA07g031570.3C	A07:22935112-22939941	-2.47507	Down
BraA04g017620.3C	A04:13458159-13458602	-1.69342	Down		BraA07g032110.3C	A07:23223044-23223506	-2.64863	Down
BraA04g017830.3C	A04:13603487-13605762	-1.84013	Down		BraA07g032170.3C	A07:23256149-23257400	-4.71381	Down
BraA04g018110.3C	A04:13755475-13758851	-1.40103	Down		BraA07g032410.3C	A07:23402944-23404833	-2.13006	Down
BraA04g018460.3C	A04:13975784-13976930	-1.20354	Down		BraA07g033010.3C	A07:23708681-23710435	-2.21963	Down
BraA04g018730.3C	A04:14172377-14174327	-0.883297	Down		BraA07g033570.3C	A07:23950994-23951903	-5.39103	Down
BraA04g018960.3C	A04:14326279-14328873	-2.04263	Down		BraA07g033780.3C	A07:24089185-24095281	-2.37541	Down
BraA04g019210.3C	A04:14552534-14554867	-1.47196	Down		BraA07g034110.3C	A07:24289207-24290188	-3.0293	Down
BraA04g019350.3C	A04:14640667-14643439	-0.940302	Down		BraA07g034300.3C	A07:24392688-24395521	-2.52664	Down
BraA04g019380.3C	A04:14663978-14670279	-0.888752	Down		BraA07g034440.3C	A07:24466796-24467770	-3.78891	Down
BraA04g019610.3C	A04:14809923-14812951	-0.926782	Down		BraA07g034650.3C	A07:24603786-24605200	-2.61206	Down
BraA04g019700.3C	A04:14854557-14856571	-2.26437	Down		BraA07g035000.3C	A07:24776301-24778710	-2.82166	Down
BraA04g019960.3C	A04:15019811-15021068	-1.4521	Down		BraA07g035160.3C	A07:24890798-24891602	-3.34371	Down
BraA04g020000.3C	A04:15042129-15045320	-1.16089	Down		BraA07g035450.3C	A07:25046757-25048434	-2.18827	Down
BraA04g020180.3C	A04:15158772-15159651	-2.15426	Down		BraA07g035620.3C	A07:25125993-25128687	-3.95506	Down
BraA04g020490.3C	A04:15421097-15422528	-1.64908	Down		BraA07g035680.3C	A07:25166304-25172173	-2.8432	Down
BraA04g020550.3C	A04:15465931-15466381	-0.740956	Down		BraA07g037140.3C	A07:25876745-25878182	-2.48271	Down
BraA04g020670.3C	A04:15537621-15540411	-1.69437	Down		BraA07g037700.3C	A07:26096715-26101314	-3.02136	Down
BraA04g020750.3C	A04:15591098-15592938	-1.0399	Down		BraA07g038220.3C	A07:26331638-26335192	-3.07182	Down
BraA04g020810.3C	A04:15665037-15668601	-0.750715	Down		BraA07g038260.3C	A07:26342741-26345652	-2.76227	Down
BraA04g021100.3C	A04:15850026-15853059	-1.36319	Down		BraA07g038310.3C	A07:26364990-26366361	-3.1233	Down
BraA04g021710.3C	A04:16228816-16230735	-2.27865	Down		BraA07g038980.3C	A07:26728484-26730548	-2.76197	Down
BraA04g021880.3C	A04:16309575-16310703	-1.24895	Down		BraA07g039010.3C	A07:26740064-26742930	-2.59185	Down
BraA04g022780.3C	A04:16824505-16825494	-1.31403	Down		BraA07g039100.3C	A07:26802171-26802660	No expression in inoculated samples	Down
BraA04g022830.3C	A04:16849542-16850784	No expression in ionculated samples	Down		BraA07g039280.3C	A07:26889724-26892309	-3.67983	Down
BraA04g022960.3C	A04:16945693-16946944	No expression in ionculated samples	Down		BraA07g039900.3C	A07:27191762-27194987	-2.75379	Down
BraA04g023200.3C	A04:17065946-17070775	-2.76621	Down		BraA07g040140.3C	A07:27274344-27276289	-2.88827	Down
BraA04g023360.3C	A04:17204711-17209684	-1.59319	Down		BraA07g040260.3C	A07:27339409-27339955	-2.63518	Down
BraA04g023530.3C	A04:17300482-17301130	-1.45358	Down		BraA07g040280.3C	A07:27344867-27347277	-2.57202	Down
BraA04g023690.3C	A04:17375183-17378054	-2.05289	Down		BraA07g040830.3C	A07:27635735-27638893	-2.78677	Down
BraA04g023850.3C	A04:17483577-17486018	-0.961516	Down		BraA07g040860.3C	A07:27648348-27651873	-2.70806	Down
BraA04g023920.3C	A04:17511129-17515289	-0.900942	Down		BraA07g041000.3C	A07:27723710-27729928	-2.41605	Down
BraA04g024340.3C	A04:17713335-17713848	No expression in ionculated samples	Down		BraA07g041110.3C	A07:27773802-27785198	-3.46119	Down
BraA04g024620.3C	A04:17846426-17849729	-1.34221	Down		BraA07g041120.3C	A07:27793705-27796715	-2.14932	Down
BraA04g024900.3C	A04:17991683-17994736	-1.14922	Down		BraA07g041180.3C	A07:27824992-27827972	-3.71821	Down
BraA04g025370.3C	A04:18210269-18211002	-1.25521	Down		BraA07g041660.3C	A07:28073736-28076100	-2.67192	Down
BraA04g025530.3C	A04:18273951-18274497	No expression in ionculated samples	Down		BraA07g041710.3C	A07:28096594-28099445	-2.63022	Down
BraA04g025830.3C	A04:18458633-18458849	No expression in ionculated samples	Down		BraA07g042700.3C	A07:28507035-28508574	-5.43511	Down
BraA04g026140.3C	A04:18649635-18650754	-1.39037	Down		BraA08g000810.3C	A08:524115-525618	-2.41193	Down
BraA04g026260.3C	A04:18730319-18732886	-2.81133	Down		BraA08g001520.3C	A08:1096204-1099561	-3.93836	Down
BraA04g026580.3C	A04:18888827-18889139	-1.05668	Down		BraA08g001770.3C	A08:1240262-1240832	-3.95015	Down
BraA04g026730.3C	A04:18954839-18960176	-2.82675	Down		BraA08g002410.3C	A08:1752703-1754112	-3.59051	Down
BraA04g026860.3C	A04:19012784-19014199	-1.48262	Down		BraA08g003420.3C	A08:2492363-2496102	-2.63095	Down
BraA04g027070.3C	A04:19131108-19134580	-1.32438	Down		BraA08g003790.3C	A08:2753246-2754650	-4.03252	Down
BraA04g027240.3C	A04:19234633-19235452	-1.63169	Down		BraA08g005160.3C	A08:3903597-3905618	-2.82285	Down
BraA04g027260.3C	A04:19259998-19260630	-1.96205	Down		BraA08g007530.3C	A08:6623217-6625583	-2.38814	Down
BraA04g027910.3C	A04:19613777-19614869	-2.86683	Down		BraA08g007700.3C	A08:6851454-6853696	-5.03377	Down
BraA04g028400.3C	A04:19882381-19883740	No expression in ionculated samples	Down		BraA08g007750.3C	A08:6885968-6895373	-2.3714	Down
BraA04g028960.3C	A04:20145020-20147370	-1.06726	Down		BraA08g008030.3C	A08:7070310-7073121	-3.24746	Down
BraA04g029070.3C	A04:20191754-20192852	-1.28535	Down		BraA08g011210.3C	A08:9824170-9827396	-2.28239	Down
BraA04g029240.3C	A04:20303076-20303724	-1.24221	Down		BraA08g011880.3C	A08:10304596-10305569	-2.58827	Down
BraA04g029400.3C	A04:20381033-20382964	-1.217	Down		BraA08g012210.3C	A08:10603304-10605825	-2.13039	Down
BraA04g029550.3C	A04:20460296-20462387	-1.07079	Down		BraA08g012240.3C	A08:10616948-10618541	-3.78451	Down
BraA04g029580.3C	A04:20470967-20471732	-2.62826	Down		BraA08g012250.3C	A08:10626587-10628081	-2.72609	Down
BraA04g029900.3C	A04:20576667-20580581	-1.18448	Down		BraA08g013070.3C	A08:11267184-11268651	-2.83643	Down
BraA04g030050.3C	A04:20652936-20653955	-2.2246	Down		BraA08g013270.3C	A08:11402868-11403372	No expression in inoculated samples	Down
BraA04g030420.3C	A04:20806459-20807092	-0.7932	Down		BraA08g014890.3C	A08:12326396-12329524	-2.46973	Down
BraA04g030490.3C	A04:20844291-20852237	-0.782142	Down		BraA08g015000.3C	A08:12383048-12387541	-3.34069	Down
BraA04g030680.3C	A04:21014060-21018535	-1.28268	Down		BraA08g015020.3C	A08:12418719-12419199	-3.31248	Down
BraA04g031650.3C	A04:21438327-21441650	-0.965458	Down		BraA08g015080.3C	A08:12465184-12472537	-2.19067	Down
BraA04g031790.3C	A04:21489930-21491519	-1.0025	Down		BraA08g015770.3C	A08:12943884-12945960	-4.68561	Down
BraA04g031850.3C	A04:21507603-21511197	-0.88433	Down		BraA08g016320.3C	A08:13287058-13288622	-3.83459	Down
BraA04g031870.3C	A04:21519281-21520731	-1.40715	Down		BraA08g016720.3C	A08:13545154-13549623	-4.27125	Down
BraA04g031970.3C	A04:21576110-21577139	-1.09252	Down		BraA08g018180.3C	A08:14465167-14468551	-2.5338	Down
BraA04g032170.3C	A04:21637353-21638436	-2.21191	Down		BraA08g018330.3C	A08:14565686-14568887	-2.29501	Down
BraA04g032180.3C	A04:21642289-21642691	-1.94835	Down		BraA08g019250.3C	A08:15042088-15044183	-3.30905	Down
BraA04g032200.3C	A04:21647821-21648961	-1.0733	Down		BraA08g019700.3C	A08:15239292-15241005	-4.42802	Down
BraA04g032240.3C	A04:21698379-21698739	-1.8265	Down		BraA08g019950.3C	A08:15339586-15340147	-2.67396	Down
BraA04g032300.3C	A04:21769470-21771692	-0.78718	Down		BraA08g020350.3C	A08:15618430-15619063	-2.82084	Down
BraA04g032360.3C	A04:21815830-21820583	-2.12327	Down		BraA08g021010.3C	A08:15978145-15983046	-2.36918	Down
BraA05g000110.3C	A05:43992-46151	-1.11193	Down		BraA08g021290.3C	A08:16136449-16140977	-2.55623	Down
BraA05g000420.3C	A05:229459-231021	-1.23623	Down		BraA08g023330.3C	A08:17223191-17226652	-3.11009	Down
BraA05g000490.3C	A05:280140-282020	-2.41734	Down		BraA08g023340.3C	A08:17249994-17254047	-2.72112	Down
BraA05g000700.3C	A05:397590-400397	-0.947343	Down		BraA08g023450.3C	A08:17325658-17328336	-2.23083	Down
BraA05g000930.3C	A05:558681-559398	-1.27737	Down		BraA08g024060.3C	A08:17634763-17638879	-2.12367	Down
BraA05g001030.3C	A05:617383-619751	-1.3855	Down		BraA08g024350.3C	A08:17791791-17792310	-4.95387	Down
BraA05g001070.3C	A05:629848-631341	-1.63063	Down		BraA08g024650.3C	A08:17949540-17952860	-2.19962	Down
BraA05g001170.3C	A05:745269-747043	-1.59282	Down		BraA08g024680.3C	A08:17967174-17971611	-2.34242	Down
BraA05g001360.3C	A05:841742-844717	-2.60929	Down		BraA08g024730.3C	A08:17995090-17995792	-4.19435	Down
BraA05g001370.3C	A05:853108-854850	-1.42821	Down		BraA08g024980.3C	A08:18113594-18118878	-2.021	Down
BraA05g001510.3C	A05:944766-946937	-1.34618	Down		BraA08g025110.3C	A08:18160188-18163223	-3.147	Down
BraA05g001750.3C	A05:1032027-1033053	-1.57882	Down		BraA08g025190.3C	A08:18198269-18198677	-2.41202	Down
BraA05g001880.3C	A05:1093598-1096236	-1.22045	Down		BraA08g025890.3C	A08:18605226-18606093	-2.33241	Down
BraA05g002050.3C	A05:1173186-1174580	-2.5178	Down		BraA08g027290.3C	A08:19301440-19307976	-2.05864	Down
BraA05g002310.3C	A05:1312578-1314474	-2.37771	Down		BraA08g028110.3C	A08:19697670-19700915	-2.91983	Down
BraA05g002590.3C	A05:1449782-1450535	-2.9102	Down		BraA08g028310.3C	A08:19808764-19809136	No expression in inoculated samples	Down
BraA05g002690.3C	A05:1484342-1485919	-1.78048	Down		BraA08g028390.3C	A08:19836771-19837874	-2.40599	Down
BraA05g002760.3C	A05:1513627-1515093	-1.25843	Down		BraA08g029150.3C	A08:20149355-20150498	-4.48391	Down
BraA05g002870.3C	A05:1537942-1539415	-1.31341	Down		BraA08g029170.3C	A08:20160098-20160884	-2.15125	Down
BraA05g003420.3C	A05:1817412-1818389	-0.841556	Down		BraA08g029290.3C	A08:20216955-20218241	-2.38826	Down
BraA05g003520.3C	A05:1871700-1872331	-1.33464	Down		BraA08g029490.3C	A08:20288575-20289972	-2.8328	Down
BraA05g003610.3C	A05:1912290-1913752	No expression in ionculated samples	Down		BraA08g030670.3C	A08:20753842-20755229	-3.04212	Down
BraA05g003620.3C	A05:1916149-1919232	-1.34831	Down		BraA08g030860.3C	A08:20821416-20822025	No expression in inoculated samples	Down
BraA05g003770.3C	A05:1984899-1987201	-0.918014	Down		BraA08g031010.3C	A08:20883261-20885457	-2.99749	Down
BraA05g004230.3C	A05:2155666-2158151	-1.03602	Down		BraA08g031170.3C	A08:20948742-20950141	-2.18126	Down
BraA05g005160.3C	A05:2607524-2612457	-0.868913	Down		BraA08g031960.3C	A08:21357678-21358861	-2.94666	Down
BraA05g005230.3C	A05:2665468-2666719	-0.784664	Down		BraA08g032060.3C	A08:21415889-21416970	-2.09272	Down
BraA05g005580.3C	A05:2802984-2804820	-1.18923	Down		BraA08g033020.3C	A08:21801601-21809766	-3.37346	Down
BraA05g005590.3C	A05:2809716-2811087	-0.831597	Down		BraA08g033060.3C	A08:21829983-21831132	-2.22145	Down
BraA05g005600.3C	A05:2811832-2813449	-1.12201	Down		BraA08g033120.3C	A08:21858825-21860545	-2.80968	Down
BraA05g005700.3C	A05:2856743-2857793	-1.27625	Down		BraA08g033700.3C	A08:22093449-22093932	-2.25516	Down
BraA05g005940.3C	A05:2989854-2991525	-1.36873	Down		BraA08g033750.3C	A08:22104866-22110161	-2.23202	Down
BraA05g006100.3C	A05:3081480-3082920	-1.18126	Down		BraA08g034670.3C	A08:22444712-22445842	-5.67158	Down
BraA05g006130.3C	A05:3094542-3097872	-0.712172	Down		BraA08g035250.3C	A08:22679307-22687995	-3.56795	Down
BraA05g006340.3C	A05:3200925-3201951	-1.59332	Down		BraA08g035440.3C	A08:22751751-22753119	-2.51858	Down
BraA05g006510.3C	A05:3297486-3303826	-0.871114	Down		BraA08g035620.3C	A08:22817011-22819508	-3.30923	Down
BraA05g006650.3C	A05:3387565-3390690	-3.27161	Down		BraA08g035730.3C	A08:22866178-22867243	-2.48902	Down
BraA05g006670.3C	A05:3392576-3395297	-1.32205	Down		BraA08g035740.3C	A08:22872049-22874765	-3.81221	Down
BraA05g006720.3C	A05:3426676-3430515	-0.912635	Down		BraA09g000010.3C	A09:4195-5870	-3.01887	Down
BraA05g007040.3C	A05:3586967-3589060	-1.13144	Down		BraA09g000420.3C	A09:206954-211161	-2.10189	Down
BraA05g007370.3C	A05:3751219-3754535	-1.24039	Down		BraA09g000580.3C	A09:274355-277250	-2.4659	Down
BraA05g007450.3C	A05:3814438-3818295	-1.44251	Down		BraA09g000840.3C	A09:498975-505397	-2.44532	Down
BraA05g007500.3C	A05:3829112-3832498	-0.759285	Down		BraA09g000940.3C	A09:558992-563532	-2.2061	Down
BraA05g007540.3C	A05:3873933-3875568	-1.2945	Down		BraA09g001120.3C	A09:740978-743607	-2.26403	Down
BraA05g007650.3C	A05:3921569-3923534	-1.66628	Down		BraA09g002530.3C	A09:1600526-1603208	-2.86258	Down
BraA05g008000.3C	A05:4077428-4077740	-0.961012	Down		BraA09g003410.3C	A09:2125055-2126117	-3.51918	Down
BraA05g008190.3C	A05:4204786-4210809	-1.99201	Down		BraA09g004000.3C	A09:2500906-2506624	-2.5031	Down
BraA05g008260.3C	A05:4255114-4261255	-1.0807	Down		BraA09g004490.3C	A09:2716080-2718802	-4.26219	Down
BraA05g008270.3C	A05:4264471-4265608	-0.87358	Down		BraA09g004550.3C	A09:2764042-2764525	-2.64221	Down
BraA05g008320.3C	A05:4290861-4293647	-1.47206	Down		BraA09g004810.3C	A09:2907883-2909749	-2.15477	Down
BraA05g008470.3C	A05:4389828-4391193	-2.03079	Down		BraA09g005280.3C	A09:3120932-3122789	-2.9058	Down
BraA05g008490.3C	A05:4412894-4414631	-2.04517	Down		BraA09g006040.3C	A09:3527378-3530390	-2.17969	Down
BraA05g008520.3C	A05:4435940-4437431	-1.63755	Down		BraA09g006250.3C	A09:3644760-3646267	-2.51541	Down
BraA05g008570.3C	A05:4448490-4449978	-1.04714	Down		BraA09g006460.3C	A09:3721223-3722493	-3.2999	Down
BraA05g008680.3C	A05:4520623-4522949	-1.22152	Down		BraA09g008620.3C	A09:4909896-4913358	-2.71424	Down
BraA05g008960.3C	A05:4740640-4741173	No expression in ionculated samples	Down		BraA09g009290.3C	A09:5300816-5303043	-2.77983	Down
BraA05g009050.3C	A05:4801855-4803529	-2.24923	Down		BraA09g009580.3C	A09:5447588-5449361	-5.12925	Down
BraA05g009100.3C	A05:4830265-4832093	-1.26193	Down		BraA09g010210.3C	A09:5881954-5883902	-2.05604	Down
BraA05g009260.3C	A05:4910502-4911378	-0.855815	Down		BraA09g010400.3C	A09:5994365-5995360	-2.60206	Down
BraA05g009370.3C	A05:4986295-4988667	-1.39779	Down		BraA09g010440.3C	A09:6037175-6038546	-2.18296	Down
BraA05g009430.3C	A05:5016880-5019566	-2.07489	Down		BraA09g013210.3C	A09:7775328-7777650	-2.42439	Down
BraA05g010070.3C	A05:5363997-5367197	-1.10218	Down		BraA09g013530.3C	A09:7936048-7938379	-2.1473	Down
BraA05g010100.3C	A05:5388636-5389743	-1.12513	Down		BraA09g013680.3C	A09:7991549-7992409	-2.20057	Down
BraA05g010320.3C	A05:5507281-5509574	-0.850272	Down		BraA09g013860.3C	A09:8094338-8097688	-3.67626	Down
BraA05g010340.3C	A05:5520915-5522183	-0.866093	Down		BraA09g013890.3C	A09:8115529-8117104	-2.33908	Down
BraA05g010610.3C	A05:5684474-5687461	-2.00392	Down		BraA09g013990.3C	A09:8200299-8202444	-3.82198	Down
BraA05g010790.3C	A05:5776567-5777641	-1.94714	Down		BraA09g014040.3C	A09:8223712-8225320	-2.40783	Down
BraA05g011280.3C	A05:6055685-6057245	-1.01795	Down		BraA09g014110.3C	A09:8242443-8243080	-2.87374	Down
BraA05g011320.3C	A05:6078568-6080986	-2.76405	Down		BraA09g014350.3C	A09:8389148-8390830	-2.38272	Down
BraA05g011330.3C	A05:6083019-6084163	-1.64428	Down		BraA09g014400.3C	A09:8404727-8407890	-3.70298	Down
BraA05g011350.3C	A05:6090242-6093845	-0.915027	Down		BraA09g014500.3C	A09:8480179-8481802	-2.16227	Down
BraA05g011460.3C	A05:6132038-6133693	-1.05638	Down		BraA09g015080.3C	A09:8857306-8863600	-2.64751	Down
BraA05g011680.3C	A05:6297617-6300242	-0.772718	Down		BraA09g015830.3C	A09:9516379-9517208	-2.75633	Down
BraA05g012680.3C	A05:6891028-6896104	-1.55619	Down		BraA09g015850.3C	A09:9533161-9535555	-5.2123	Down
BraA05g013260.3C	A05:7319202-7320213	-2.24946	Down		BraA09g016180.3C	A09:9911527-9914566	-2.6067	Down
BraA05g013580.3C	A05:7572403-7573453	-0.916101	Down		BraA09g016920.3C	A09:10444547-10446515	-2.15803	Down
BraA05g013790.3C	A05:7727128-7727970	-1.93789	Down		BraA09g017070.3C	A09:10524506-10527031	-2.18686	Down
BraA05g013840.3C	A05:7776386-7776695	-1.50693	Down		BraA09g017520.3C	A09:10865549-10870845	-2.91085	Down
BraA05g013880.3C	A05:7802339-7809495	-2.40596	Down		BraA09g017590.3C	A09:10982293-10983515	-2.5134	Down
BraA05g013890.3C	A05:7813824-7816830	-1.06613	Down		BraA09g018550.3C	A09:11870661-11872233	-4.77254	Down
BraA05g014220.3C	A05:8041901-8043414	-1.91051	Down		BraA09g018750.3C	A09:12009217-12011049	-2.01262	Down
BraA05g014570.3C	A05:8290582-8290860	No expression in ionculated samples	Down		BraA09g019200.3C	A09:12287244-12287799	-3.17835	Down
BraA05g014820.3C	A05:8438047-8439191	-1.43493	Down		BraA09g019450.3C	A09:12499426-12501455	-2.81874	Down
BraA05g014830.3C	A05:8440693-8441865	-1.14442	Down		BraA09g019950.3C	A09:12909317-12909909	-2.02097	Down
BraA05g014840.3C	A05:8445547-8446639	No expression in ionculated samples	Down		BraA09g020160.3C	A09:13057944-13058238	-3.62775	Down
BraA05g014900.3C	A05:8482004-8484255	-1.03641	Down		BraA09g020290.3C	A09:13142401-13144069	-3.15482	Down
BraA05g015000.3C	A05:8576224-8577774	-1.69074	Down		BraA09g021180.3C	A09:13768652-13770568	-3.20753	Down
BraA05g015070.3C	A05:8621983-8623122	-1.39175	Down		BraA09g021410.3C	A09:13934695-13935040	No expression in inoculated samples	Down
BraA05g016240.3C	A05:9622905-9623085	-1.00136	Down		BraA09g021750.3C	A09:14208439-14210954	-2.49464	Down
BraA05g016340.3C	A05:9718604-9719171	-1.08923	Down		BraA09g022470.3C	A09:14852246-14859450	-2.39891	Down
BraA05g016440.3C	A05:9752547-9753281	-0.929588	Down		BraA09g022980.3C	A09:15179630-15181651	-4.23475	Down
BraA05g016630.3C	A05:9896636-9898484	-0.912205	Down		BraA09g023480.3C	A09:15734116-15734686	-2.10874	Down
BraA05g017440.3C	A05:10513511-10516716	-1.70252	Down		BraA09g024580.3C	A09:16493677-16498305	-2.82995	Down
BraA05g017590.3C	A05:10616128-10616488	-0.954655	Down		BraA09g025180.3C	A09:16915864-16919267	-2.05733	Down
BraA05g017620.3C	A05:10651396-10653678	-1.41461	Down		BraA09g025190.3C	A09:16924020-16924696	-4.66109	Down
BraA05g018110.3C	A05:11123055-11126042	-1.39873	Down		BraA09g025690.3C	A09:17272979-17274619	-6.20787	Down
BraA05g018250.3C	A05:11211796-11213720	-1.08622	Down		BraA09g026600.3C	A09:17999610-18001419	-3.21738	Down
BraA05g018270.3C	A05:11230351-11233784	-0.876106	Down		BraA09g026760.3C	A09:18146583-18151633	-2.74933	Down
BraA05g018590.3C	A05:11587339-11587814	-1.36667	Down		BraA09g026980.3C	A09:18343097-18346127	-2.06372	Down
BraA05g019040.3C	A05:11942021-11945105	-1.94519	Down		BraA09g028180.3C	A09:19257193-19260314	-2.21721	Down
BraA05g020280.3C	A05:13221992-13227058	-0.940409	Down		BraA09g028700.3C	A09:19801458-19802634	-2.33937	Down
BraA05g020770.3C	A05:13755812-13757728	-1.89388	Down		BraA09g029480.3C	A09:21122060-21123304	-2.26175	Down
BraA05g022150.3C	A05:15880996-15882037	-1.5241	Down		BraA09g032690.3C	A09:25398461-25402221	-4.57695	Down
BraA05g022210.3C	A05:15932051-15934195	-1.79278	Down		BraA09g032840.3C	A09:25471281-25477168	-2.54689	Down
BraA05g022470.3C	A05:16251750-16253520	-1.72291	Down		BraA09g033380.3C	A09:26045235-26046573	-2.22827	Down
BraA05g023490.3C	A05:17380155-17384804	-1.4589	Down		BraA09g033410.3C	A09:26054239-26059811	-2.46192	Down
BraA05g024150.3C	A05:17988960-17990229	-1.47668	Down		BraA09g034450.3C	A09:27114772-27117334	-2.24042	Down
BraA05g024270.3C	A05:18075540-18078122	-1.60438	Down		BraA09g035530.3C	A09:28071568-28073683	-2.31848	Down
BraA05g024770.3C	A05:18581069-18583602	-1.67412	Down		BraA09g035710.3C	A09:28220271-28221357	-4.93286	Down
BraA05g025190.3C	A05:18933414-18935795	-0.783467	Down		BraA09g036060.3C	A09:28454711-28456217	-2.31359	Down
BraA05g025490.3C	A05:19200396-19202444	-2.34156	Down		BraA09g036210.3C	A09:28614082-28614751	-3.86913	Down
BraA05g025550.3C	A05:19259288-19260782	-1.89385	Down		BraA09g036260.3C	A09:28653380-28660459	-2.54876	Down
BraA05g026530.3C	A05:19979646-19982847	-1.97807	Down		BraA09g036280.3C	A09:28667671-28668709	-2.0602	Down
BraA05g026940.3C	A05:20262946-20264657	-1.32102	Down		BraA09g036730.3C	A09:29126078-29138093	-2.06375	Down
BraA05g027400.3C	A05:20550345-20552144	-1.21743	Down		BraA09g036790.3C	A09:29177814-29182578	-3.85528	Down
BraA05g027490.3C	A05:20596513-20600173	-2.04221	Down		BraA09g036900.3C	A09:29248295-29248985	-3.27145	Down
BraA05g027830.3C	A05:20839097-20840983	-2.31761	Down		BraA09g037240.3C	A09:29452475-29453150	-2.442	Down
BraA05g027910.3C	A05:20909111-20910380	-1.80306	Down		BraA09g038000.3C	A09:29986485-29989675	-1.98385	Down
BraA05g028200.3C	A05:21059831-21062904	-1.15387	Down		BraA09g038100.3C	A09:30049292-30054150	-2.12926	Down
BraA05g028490.3C	A05:21246206-21248177	-1.07876	Down		BraA09g038250.3C	A09:30200657-30203508	-3.46331	Down
BraA05g028520.3C	A05:21265031-21266406	-1.06126	Down		BraA09g038640.3C	A09:30424067-30425282	-4.388	Down
BraA05g029030.3C	A05:21537696-21540219	-1.32101	Down		BraA09g038670.3C	A09:30438557-30439759	-4.47533	Down
BraA05g029520.3C	A05:21842387-21845635	No expression in ionculated samples	Down		BraA09g038760.3C	A09:30486747-30488734	-3.46629	Down
BraA05g029990.3C	A05:22061531-22062167	-1.75854	Down		BraA09g038830.3C	A09:30518289-30518814	-2.75172	Down
BraA05g030050.3C	A05:22114184-22117606	-1.4102	Down		BraA09g038950.3C	A09:30632398-30636465	-4.54283	Down
BraA05g030330.3C	A05:22300714-22301575	No expression in ionculated samples	Down		BraA09g039110.3C	A09:30725082-30726594	-2.78969	Down
BraA05g030400.3C	A05:22338715-22343927	-1.19577	Down		BraA09g039560.3C	A09:30985109-30986021	-3.63975	Down
BraA05g030960.3C	A05:22724489-22725983	-3.62404	Down		BraA09g040210.3C	A09:31401527-31403554	-2.38519	Down
BraA05g031600.3C	A05:23084056-23085477	-2.32112	Down		BraA09g040260.3C	A09:31435844-31436279	No expression in inoculated samples	Down
BraA05g031630.3C	A05:23115235-23116172	-1.90417	Down		BraA09g040580.3C	A09:31678895-31681339	-2.87359	Down
BraA05g031650.3C	A05:23130497-23133499	-0.770304	Down		BraA09g040790.3C	A09:31805053-31805836	-3.51122	Down
BraA05g031680.3C	A05:23139734-23141631	-1.71686	Down		BraA09g041440.3C	A09:32289089-32291092	-2.53094	Down
BraA05g031830.3C	A05:23187197-23190113	-1.53133	Down		BraA09g042420.3C	A09:32993440-32994954	-2.08247	Down
BraA05g032000.3C	A05:23291067-23292190	-1.96022	Down		BraA09g042820.3C	A09:33205210-33207979	-2.69462	Down
BraA05g032350.3C	A05:23489076-23490670	-3.08358	Down		BraA09g042840.3C	A09:33216211-33220394	-2.14685	Down
BraA05g032370.3C	A05:23500238-23500776	-3.73278	Down		BraA09g042890.3C	A09:33244266-33246879	-2.19867	Down
BraA05g032400.3C	A05:23510489-23512742	-2.16721	Down		BraA09g043610.3C	A09:33670471-33671779	-4.24879	Down
BraA05g032430.3C	A05:23522146-23524103	-1.18023	Down		BraA09g043880.3C	A09:33903051-33903582	-2.6028	Down
BraA05g032870.3C	A05:23777782-23781966	-1.23899	Down		BraA09g044270.3C	A09:34135650-34138167	-4.62978	Down
BraA05g033190.3C	A05:23920716-23926530	-0.830119	Down		BraA09g045700.3C	A09:34887519-34893210	-2.83049	Down
BraA05g033270.3C	A05:23984848-23989251	-1.13721	Down		BraA09g045790.3C	A09:34941845-34945189	-2.42365	Down
BraA05g033330.3C	A05:24021651-24024948	-0.835403	Down		BraA09g046040.3C	A09:35060166-35062402	-2.42756	Down
BraA05g033350.3C	A05:24034796-24036341	-1.07762	Down		BraA09g046060.3C	A09:35070608-35072202	-2.34725	Down
BraA05g033550.3C	A05:24116561-24118289	-0.897267	Down		BraA09g046270.3C	A09:35194502-35196322	-2.33205	Down
BraA05g033590.3C	A05:24135552-24135738	-2.72789	Down		BraA09g046410.3C	A09:35297357-35300299	-2.45114	Down
BraA05g033680.3C	A05:24183312-24185875	-0.770736	Down		BraA09g046590.3C	A09:35431424-35432702	-4.89186	Down
BraA05g034040.3C	A05:24354667-24355849	-1.22273	Down		BraA09g046680.3C	A09:35483258-35485673	-2.95953	Down
BraA05g034160.3C	A05:24427999-24429182	-1.39446	Down		BraA09g046730.3C	A09:35526731-35528369	-6.04609	Down
BraA05g034600.3C	A05:24613467-24614732	-1.47939	Down		BraA09g046920.3C	A09:35621633-35623684	-5.7248	Down
BraA05g034710.3C	A05:24649608-24651529	-1.57356	Down		BraA09g047010.3C	A09:35694320-35695123	-2.72988	Down
BraA05g034790.3C	A05:24684603-24685758	-1.31703	Down		BraA09g047080.3C	A09:35714542-35717835	-2.09883	Down
BraA05g035210.3C	A05:24856010-24857324	-1.07006	Down		BraA09g047250.3C	A09:35777902-35782936	-2.09696	Down
BraA05g035250.3C	A05:24873798-24877194	-1.09186	Down		BraA09g047490.3C	A09:35898684-35899371	-3.1419	Down
BraA05g035260.3C	A05:24888719-24889358	-0.928606	Down		BraA09g048110.3C	A09:36262091-36264791	-2.40516	Down
BraA05g035370.3C	A05:24940901-24945317	-0.756209	Down		BraA09g049020.3C	A09:36717425-36721416	-2.14839	Down
BraA05g035590.3C	A05:25040382-25041269	-1.01612	Down		BraA09g049300.3C	A09:36855974-36859290	-2.50698	Down
BraA05g035680.3C	A05:25094299-25096334	-1.52746	Down		BraA09g050760.3C	A09:37509264-37509828	-3.56187	Down
BraA05g036230.3C	A05:25293448-25294210	-0.935908	Down		BraA09g050930.3C	A09:37576440-37578714	-2.26814	Down
BraA05g036930.3C	A05:25607142-25609076	-1.5808	Down		BraA09g050970.3C	A09:37599534-37600918	-2.0917	Down
BraA05g037020.3C	A05:25635805-25638579	-1.97333	Down		BraA09g052020.3C	A09:38105116-38106487	-2.79491	Down
BraA05g037300.3C	A05:25755300-25757517	-2.24341	Down		BraA09g052400.3C	A09:38262873-38263612	-1.98302	Down
BraA05g037560.3C	A05:25867154-25868846	-0.933437	Down		BraA09g052700.3C	A09:38408383-38413747	-2.09927	Down
BraA05g037570.3C	A05:25870228-25872062	-1.32254	Down		BraA09g052820.3C	A09:38455027-38457247	-2.16323	Down
BraA05g037920.3C	A05:26019018-26020467	-0.9962	Down		BraA09g053080.3C	A09:38567459-38570129	-2.22225	Down
BraA05g038720.3C	A05:26419022-26420380	-1.27189	Down		BraA09g053590.3C	A09:38874008-38874884	-1.99938	Down
BraA05g039200.3C	A05:26747378-26747894	-1.13984	Down		BraA09g053610.3C	A09:38878732-38879851	-3.67927	Down
BraA05g039260.3C	A05:26825196-26827714	-1.49329	Down		BraA09g054080.3C	A09:39130833-39133094	-3.13121	Down
BraA05g039380.3C	A05:26881435-26886406	-0.8456	Down		BraA09g054200.3C	A09:39228596-39232683	-2.20682	Down
BraA05g039450.3C	A05:26904796-26907071	-1.02022	Down		BraA09g054780.3C	A09:39633660-39634870	-3.16722	Down
BraA05g039460.3C	A05:26907683-26909671	-0.961405	Down		BraA09g054810.3C	A09:39651018-39651966	-3.23076	Down
BraA05g039530.3C	A05:26965429-26967471	-1.00737	Down		BraA09g055030.3C	A09:39775927-39777666	-6.0954	Down
BraA05g039550.3C	A05:26974710-26975316	-2.00977	Down		BraA09g055620.3C	A09:40071314-40075371	-2.74565	Down
BraA05g040010.3C	A05:27203849-27207675	-1.11925	Down		BraA09g055720.3C	A09:40129532-40129847	-2.29219	Down
BraA05g040280.3C	A05:27346287-27349108	-0.824492	Down		BraA09g056770.3C	A09:40576557-40578435	No expression in inoculated samples	Down
BraA05g040560.3C	A05:27489626-27489983	No expression in ionculated samples	Down		BraA09g056960.3C	A09:40656215-40662104	-2.99859	Down
BraA05g041090.3C	A05:27725624-27727752	-0.807705	Down		BraA09g057050.3C	A09:40696983-40698132	-4.44752	Down
BraA05g041150.3C	A05:27750634-27767704	-0.736175	Down		BraA09g057560.3C	A09:40932002-40933367	-2.5512	Down
BraA05g041410.3C	A05:27867610-27869303	-1.22491	Down		BraA09g058560.3C	A09:41481398-41486226	-2.13565	Down
BraA05g042020.3C	A05:28132944-28134821	-1.67435	Down		BraA09g059120.3C	A09:41758238-41761711	-2.79357	Down
BraA05g042090.3C	A05:28178692-28183083	-0.848289	Down		BraA09g059280.3C	A09:41844825-41847536	-2.82124	Down
BraA06g000210.3C	A06:188867-190240	-1.24978	Down		BraA09g059980.3C	A09:42130820-42131814	-3.40901	Down
BraA06g000610.3C	A06:420172-420352	-1.27043	Down		BraA09g060310.3C	A09:42306806-42309473	-2.02689	Down
BraA06g000620.3C	A06:431601-434976	-1.42798	Down		BraA09g060440.3C	A09:42380121-42382074	-2.28631	Down
BraA06g001070.3C	A06:692553-693159	-1.54044	Down		BraA09g060680.3C	A09:42476409-42477027	No expression in inoculated samples	Down
BraA06g001080.3C	A06:694455-695061	-2.47791	Down		BraA09g061870.3C	A09:43081759-43082970	-2.3747	Down
BraA06g001110.3C	A06:705760-708152	-1.84423	Down		BraA09g061930.3C	A09:43110664-43111652	-2.24474	Down
BraA06g001180.3C	A06:729160-731988	-1.1625	Down		BraA09g063880.3C	A09:43982723-43984122	-2.99233	Down
BraA06g001710.3C	A06:1068582-1069753	-1.269	Down		BraA09g064270.3C	A09:44139833-44140352	-2.26618	Down
BraA06g001720.3C	A06:1072813-1074421	-0.782358	Down		BraA09g064360.3C	A09:44173745-44175369	-3.14536	Down
BraA06g002750.3C	A06:1637227-1637734	-0.894233	Down		BraA09g065380.3C	A09:44626055-44630977	-2.63185	Down
BraA06g003140.3C	A06:1836502-1837222	-1.08741	Down		BraA09g065390.3C	A09:44635761-44649446	-2.11995	Down
BraA06g003150.3C	A06:1844073-1846689	-1.4137	Down		BraA09g065910.3C	A09:44871347-44873663	-5.20993	Down
BraA06g003260.3C	A06:1887644-1890711	-1.38175	Down		BraA09g066210.3C	A09:45030872-45031937	-2.41246	Down
BraA06g003400.3C	A06:2052975-2054888	-1.64412	Down		BraA10g000300.3C	A10:131538-132586	-3.47795	Down
BraA06g003530.3C	A06:2145868-2146906	-0.957056	Down		BraA10g000470.3C	A10:224559-226022	-3.26992	Down
BraA06g003640.3C	A06:2193309-2194599	-0.912419	Down		BraA10g000550.3C	A10:267594-269046	-2.99254	Down
BraA06g003770.3C	A06:2246939-2249504	-1.02775	Down		BraA10g000590.3C	A10:278168-278994	-2.19189	Down
BraA06g003830.3C	A06:2279605-2283029	-1.37079	Down		BraA10g000820.3C	A10:418302-421107	-5.29313	Down
BraA06g003840.3C	A06:2285374-2287501	-1.32913	Down		BraA10g000850.3C	A10:432014-433214	-2.74142	Down
BraA06g004390.3C	A06:2621491-2623075	-0.882276	Down		BraA10g000860.3C	A10:444136-445171	-3.75214	Down
BraA06g004620.3C	A06:2719087-2724476	-1.12793	Down		BraA10g001020.3C	A10:537012-539715	-2.07184	Down
BraA06g004780.3C	A06:2804969-2807258	-0.977539	Down		BraA10g002650.3C	A10:1346104-1351388	-2.11153	Down
BraA06g004860.3C	A06:2911327-2913000	-1.76848	Down		BraA10g002770.3C	A10:1417038-1420184	-4.51553	Down
BraA06g005040.3C	A06:3004999-3006283	-1.57902	Down		BraA10g002780.3C	A10:1435433-1436156	-2.66932	Down
BraA06g005130.3C	A06:3035439-3037395	-1.17677	Down		BraA10g003110.3C	A10:1598398-1599145	-4.78776	Down
BraA06g005630.3C	A06:3316261-3318673	-1.0298	Down		BraA10g003270.3C	A10:1701470-1702667	-4.03134	Down
BraA06g005660.3C	A06:3324019-3325584	-1.07025	Down		BraA10g003750.3C	A10:1971231-1973667	-2.11131	Down
BraA06g005670.3C	A06:3327715-3328203	No expression in ionculated samples	Down		BraA10g003770.3C	A10:1978690-1980997	-3.66855	Down
BraA06g005770.3C	A06:3378508-3381411	-1.08904	Down		BraA10g003810.3C	A10:2000130-2003207	-2.54709	Down
BraA06g005870.3C	A06:3429361-3432321	-1.41223	Down		BraA10g003870.3C	A10:2023157-2024583	-2.64636	Down
BraA06g006140.3C	A06:3546777-3547749	-1.57336	Down		BraA10g004890.3C	A10:2613548-2614920	-2.66256	Down
BraA06g006390.3C	A06:3650218-3652314	-0.996953	Down		BraA10g005510.3C	A10:2940321-2945957	-2.60576	Down
BraA06g006450.3C	A06:3683069-3686670	-0.746542	Down		BraA10g005800.3C	A10:3126082-3127318	-2.6141	Down
BraA06g006930.3C	A06:3889696-3891332	-1.85972	Down		BraA10g006950.3C	A10:4020864-4022533	-3.75309	Down
BraA06g007240.3C	A06:4021810-4023634	-1.14751	Down		BraA10g009420.3C	A10:7238229-7238883	-3.1959	Down
BraA06g007530.3C	A06:4155837-4158342	-0.889677	Down		BraA10g010540.3C	A10:8669325-8669988	-4.59447	Down
BraA06g007550.3C	A06:4174414-4175584	-2.04636	Down		BraA10g011840.3C	A10:9752315-9754506	-2.63603	Down
BraA06g007690.3C	A06:4241730-4243792	-2.3696	Down		BraA10g011930.3C	A10:9871265-9871658	-2.74309	Down
BraA06g007950.3C	A06:4363460-4366197	-1.29182	Down		BraA10g012240.3C	A10:10141003-10143089	-3.07582	Down
BraA06g007980.3C	A06:4378693-4381661	-0.765163	Down		BraA10g012420.3C	A10:10249682-10255401	-2.76668	Down
BraA06g008000.3C	A06:4389448-4392473	-1.76498	Down		BraA10g012430.3C	A10:10272203-10273248	-2.95137	Down
BraA06g008170.3C	A06:4461813-4463046	-1.69911	Down		BraA10g012500.3C	A10:10318991-10320532	-2.58632	Down
BraA06g008400.3C	A06:4564126-4565088	-1.41759	Down		BraA10g012580.3C	A10:10383548-10383944	-2.92288	Down
BraA06g009010.3C	A06:4896888-4898991	-1.08105	Down		BraA10g013010.3C	A10:10692209-10694033	-4.37456	Down
BraA06g009140.3C	A06:4966329-4967394	No expression in ionculated samples	Down		BraA10g013340.3C	A10:10921907-10922942	-2.24579	Down
BraA06g009200.3C	A06:5011288-5014034	-2.89388	Down		BraA10g013610.3C	A10:11077857-11078163	-2.92861	Down
BraA06g009240.3C	A06:5048278-5050859	-1.69405	Down		BraA10g014100.3C	A10:11356766-11359685	-2.34503	Down
BraA06g009500.3C	A06:5200058-5200472	-0.773192	Down		BraA10g014690.3C	A10:11750088-11751736	-4.85086	Down
BraA06g009760.3C	A06:5291933-5293535	-0.967624	Down		BraA10g014710.3C	A10:11763252-11771400	-2.79609	Down
BraA06g009950.3C	A06:5385285-5386938	-1.7013	Down		BraA10g014730.3C	A10:11771619-11772256	No expression in inoculated samples	Down
BraA06g009970.3C	A06:5409867-5410886	-2.47263	Down		BraA10g014970.3C	A10:11926149-11927868	-2.14782	Down
BraA06g010390.3C	A06:5640072-5641212	-0.77019	Down		BraA10g015980.3C	A10:12467148-12471022	-2.09616	Down
BraA06g010480.3C	A06:5682925-5686062	-2.84147	Down		BraA10g016140.3C	A10:12538938-12543923	-2.40539	Down
BraA06g011790.3C	A06:6336348-6341240	-0.952566	Down		BraA10g016210.3C	A10:12575359-12577193	-2.67334	Down
BraA06g011820.3C	A06:6351684-6360816	-1.6826	Down		BraA10g016410.3C	A10:12651406-12652222	No expression in inoculated samples	Down
BraA06g012230.3C	A06:6536847-6539479	-2.04045	Down		BraA10g017310.3C	A10:13089101-13090895	-3.01611	Down
BraA06g012570.3C	A06:6687094-6690244	-0.858275	Down		BraA10g017370.3C	A10:13115447-13116641	-3.45192	Down
BraA06g012650.3C	A06:6729192-6732253	-0.790913	Down		BraA10g017650.3C	A10:13282147-13282630	-4.22041	Down
BraA06g012990.3C	A06:6884862-6885645	No expression in ionculated samples	Down		BraA10g018800.3C	A10:13898213-13902704	-2.32623	Down
BraA06g013170.3C	A06:6948563-6952439	-0.768378	Down		BraA10g018830.3C	A10:13915241-13916540	-2.23552	Down
BraA06g013340.3C	A06:7035988-7036762	-1.29506	Down		BraA10g019060.3C	A10:14086810-14087656	-3.89112	Down
BraA06g013420.3C	A06:7081764-7085636	-0.987986	Down		BraA10g019870.3C	A10:14541744-14542308	-2.48938	Down
BraA06g013600.3C	A06:7202987-7204144	No expression in ionculated samples	Down		BraA10g021480.3C	A10:15350837-15352708	-3.79159	Down
BraA06g013710.3C	A06:7242532-7244793	-1.1903	Down		BraA10g022240.3C	A10:15677249-15678875	-2.98375	Down
BraA06g013860.3C	A06:7322551-7324322	-1.23798	Down		BraA10g022320.3C	A10:15711170-15712804	-2.25272	Down
BraA06g013880.3C	A06:7332183-7332687	-1.05825	Down		BraA10g022510.3C	A10:15805906-15807484	-3.25279	Down
BraA06g014030.3C	A06:7418912-7420371	-2.2777	Down		BraA10g022630.3C	A10:15853779-15854334	-2.41692	Down
BraA06g014270.3C	A06:7549384-7552013	-1.03737	Down		BraA10g022970.3C	A10:16025958-16030470	-2.78965	Down
BraA06g014310.3C	A06:7563092-7566979	-0.770684	Down		BraA10g023170.3C	A10:16130325-16132305	-3.2635	Down
BraA06g014330.3C	A06:7579247-7580759	-1.11095	Down		BraA10g023600.3C	A10:16337529-16338440	-2.37803	Down
BraA06g014700.3C	A06:7805538-7806704	-1.51145	Down		BraA10g023650.3C	A10:16361118-16362225	-3.60315	Down
BraA06g014730.3C	A06:7832028-7835493	-0.895073	Down		BraA10g023660.3C	A10:16362316-16363792	-2.87753	Down
BraA06g014970.3C	A06:7970612-7972101	-1.41793	Down		BraA10g023720.3C	A10:16381731-16382745	-2.89051	Down
BraA06g015080.3C	A06:8081462-8083565	-2.23499	Down		BraA10g023800.3C	A10:16416869-16418034	-3.57521	Down
BraA06g015240.3C	A06:8150654-8152433	-1.03132	Down		BraA10g023920.3C	A10:16470629-16473862	-2.70114	Down
BraA06g015400.3C	A06:8259753-8262934	-1.68075	Down		BraA10g023980.3C	A10:16501855-16503250	-3.24577	Down
BraA06g015640.3C	A06:8473746-8474331	-2.30908	Down		BraA10g024080.3C	A10:16550869-16552034	-2.14803	Down
BraA06g015660.3C	A06:8490150-8491480	-1.54175	Down		BraA10g024370.3C	A10:16696852-16698680	-2.28347	Down
BraA06g016050.3C	A06:8715156-8716940	-0.953256	Down		BraA10g025130.3C	A10:16979272-16982256	-3.09228	Down
BraA06g016090.3C	A06:8749625-8752698	-1.68927	Down		BraA10g025250.3C	A10:17035554-17039163	-2.59099	Down
BraA06g016120.3C	A06:8771737-8774836	-0.803749	Down		BraA10g025640.3C	A10:17229289-17230525	-2.28705	Down
BraA06g016250.3C	A06:8858864-8860139	-1.1833	Down		BraA10g025960.3C	A10:17379109-17386388	-2.7284	Down
BraA06g016460.3C	A06:8983721-8988722	-0.987676	Down		BraA10g026530.3C	A10:17613347-17615049	-2.14213	Down
BraA06g016510.3C	A06:9027818-9028964	-0.888171	Down		BraA10g026880.3C	A10:17768283-17769286	-2.98327	Down
BraA06g016770.3C	A06:9211024-9212573	-1.56127	Down		BraA10g027130.3C	A10:17873690-17878112	-3.36924	Down
BraA06g016930.3C	A06:9336747-9337979	-2.73242	Down		BraA10g027520.3C	A10:18051722-18052523	-2.08678	Down
BraA06g017050.3C	A06:9405175-9408215	-0.852095	Down		BraA10g027530.3C	A10:18053162-18058746	-2.40256	Down
BraA06g017160.3C	A06:9457870-9461782	-1.02871	Down		BraA10g027560.3C	A10:18062541-18064986	-2.43578	Down
BraA06g017310.3C	A06:9545984-9546390	-1.42811	Down		BraA10g027690.3C	A10:18106650-18110038	-2.47582	Down
BraA06g017510.3C	A06:9669390-9674886	-0.801396	Down		BraA10g027740.3C	A10:18138775-18141680	-2.24438	Down
BraA06g017580.3C	A06:9719595-9719877	-1.07938	Down		BraA10g027810.3C	A10:18175044-18178102	-2.68955	Down
BraA06g018260.3C	A06:10219643-10223450	-1.34859	Down		BraA10g028180.3C	A10:18315638-18316328	-2.75875	Down
BraA06g018300.3C	A06:10255011-10257082	-1.13259	Down		BraA10g028200.3C	A10:18322726-18323713	-2.51857	Down
BraA06g018310.3C	A06:10259118-10261128	-2.46733	Down		BraA10g029480.3C	A10:18815710-18816085	-3.93336	Down
BraA06g018810.3C	A06:10669131-10670694	-1.31753	Down		BraA10g029630.3C	A10:18872769-18876466	-3.34238	Down
BraA06g018860.3C	A06:10683132-10686060	-1.90945	Down		BraA10g029850.3C	A10:18968029-18968881	-2.65482	Down
BraA06g019140.3C	A06:10865271-10870704	No expression in ionculated samples	Down		BraA10g030120.3C	A10:19096250-19098090	-2.28536	Down
BraA06g019390.3C	A06:11073294-11076417	-1.77227	Down		BraA10g030950.3C	A10:19417039-19418604	-2.93666	Down
BraA06g019510.3C	A06:11167592-11169372	-0.737314	Down		BraA10g031020.3C	A10:19453690-19454945	-2.1491	Down
BraA06g019590.3C	A06:11228989-11229927	-0.78641	Down		BraA10g031470.3C	A10:19620350-19621904	-2.41069	Down
BraA06g019600.3C	A06:11257724-11259388	-1.74862	Down		BraA10g031520.3C	A10:19641169-19644551	-3.06004	Down
BraA06g019710.3C	A06:11343112-11344147	No expression in ionculated samples	Down		BraA10g031550.3C	A10:19655905-19658655	-3.82505	Down
BraA06g019960.3C	A06:11483334-11490115	-0.841476	Down		BraA10g031910.3C	A10:19835612-19837809	-2.15859	Down
BraA06g020070.3C	A06:11537447-11538612	-1.28256	Down		BraA10g032730.3C	A10:20276048-20278420	-2.13165	Down
BraA06g020080.3C	A06:11545942-11547669	-0.916086	Down		BraA10g032890.3C	A10:20337971-20340091	-3.03319	Down
BraA06g020210.3C	A06:11637201-11638608	-0.908764	Down		BraA01g000350.3C	A01:163764-164530	2.55923	Up
BraA06g020530.3C	A06:11918376-11919270	-1.19675	Down		BraA01g001120.3C	A01:521847-523604	2.06871	Up
BraA06g021550.3C	A06:12881786-12884094	-1.68515	Down		BraA01g001150.3C	A01:531905-535022	4.4034	Up
BraA06g022060.3C	A06:13285911-13290740	-0.84711	Down		BraA01g001340.3C	A01:677373-678247	3.29219	Up
BraA06g022070.3C	A06:13293860-13295307	-1.93075	Down		BraA01g001360.3C	A01:683623-684955	4.44147	Up
BraA06g023430.3C	A06:16000572-16000971	-1.62236	Down		BraA01g001860.3C	A01:934011-935169	No expression in control samples	Up
BraA06g023460.3C	A06:16003762-16005145	-1.65501	Down		BraA01g002000.3C	A01:1005447-1006539	2.13701	Up
BraA06g023470.3C	A06:16029451-16031891	-1.87704	Down		BraA01g002490.3C	A01:1249793-1251120	2.30994	Up
BraA06g023480.3C	A06:16035619-16037638	-4.26552	Down		BraA01g002570.3C	A01:1293382-1293862	2.37097	Up
BraA06g023670.3C	A06:16199804-16201964	No expression in ionculated samples	Down		BraA01g002890.3C	A01:1424613-1425521	2.21583	Up
BraA06g024240.3C	A06:16703979-16705500	-0.708395	Down		BraA01g003410.3C	A01:1700837-1703139	4.64081	Up
BraA06g024660.3C	A06:17117927-17118899	-0.734361	Down		BraA01g003460.3C	A01:1721092-1721608	2.18475	Up
BraA06g024820.3C	A06:17262913-17264113	-0.722502	Down		BraA01g003740.3C	A01:1843017-1847043	2.6227	Up
BraA06g024960.3C	A06:17386907-17391436	-1.69598	Down		BraA01g003940.3C	A01:1925219-1926046	2.47933	Up
BraA06g025430.3C	A06:17735495-17740075	-0.880545	Down		BraA01g004150.3C	A01:2010670-2012292	2.17769	Up
BraA06g025540.3C	A06:17827476-17830604	-0.844458	Down		BraA01g005100.3C	A01:2431231-2433581	2.96606	Up
BraA06g025690.3C	A06:17984156-17986549	-1.82679	Down		BraA01g005570.3C	A01:2698373-2704595	3.88899	Up
BraA06g025740.3C	A06:18038800-18040375	-1.20886	Down		BraA01g006180.3C	A01:2985909-2986410	No expression in control samples	Up
BraA06g026170.3C	A06:18339920-18342285	-2.1306	Down		BraA01g006370.3C	A01:3074357-3076087	2.29833	Up
BraA06g026380.3C	A06:18486635-18488853	-1.99694	Down		BraA01g007070.3C	A01:3381338-3382199	2.25482	Up
BraA06g026530.3C	A06:18574910-18578228	-1.53402	Down		BraA01g007120.3C	A01:3392194-3397060	2.33952	Up
BraA06g026780.3C	A06:18778398-18780864	-1.00557	Down		BraA01g007440.3C	A01:3566087-3567130	4.42249	Up
BraA06g026800.3C	A06:18785166-18788267	-1.10781	Down		BraA01g007790.3C	A01:3789546-3790764	2.88094	Up
BraA06g026840.3C	A06:18806089-18808294	-1.14002	Down		BraA01g008110.3C	A01:3926682-3928626	3.39516	Up
BraA06g027510.3C	A06:19223901-19224601	-1.00245	Down		BraA01g008230.3C	A01:3964958-3966494	2.20249	Up
BraA06g027760.3C	A06:19354822-19357573	-0.907863	Down		BraA01g009000.3C	A01:4454572-4457667	3.08321	Up
BraA06g028030.3C	A06:19490480-19495658	-1.13361	Down		BraA01g009130.3C	A01:4550889-4551612	2.49933	Up
BraA06g028270.3C	A06:19645323-19646102	-1.32513	Down		BraA01g009630.3C	A01:4880152-4880784	2.3074	Up
BraA06g028400.3C	A06:19678329-19682266	-0.775461	Down		BraA01g010550.3C	A01:5438387-5440390	2.59961	Up
BraA06g028460.3C	A06:19712865-19715668	-1.38818	Down		BraA01g011210.3C	A01:5844678-5846831	2.1688	Up
BraA06g028610.3C	A06:19796742-19798967	-2.32804	Down		BraA01g012570.3C	A01:6552239-6552797	5.11692	Up
BraA06g028670.3C	A06:19878601-19880466	-1.27524	Down		BraA01g012600.3C	A01:6561159-6561981	3.76842	Up
BraA06g028840.3C	A06:19992791-19996196	-2.15355	Down		BraA01g012930.3C	A01:6788071-6789905	3.49311	Up
BraA06g028910.3C	A06:20040530-20046717	-0.739438	Down		BraA01g012960.3C	A01:6800612-6802895	2.55707	Up
BraA06g029010.3C	A06:20107537-20110418	-1.56933	Down		BraA01g013280.3C	A01:6957599-6959174	2.96041	Up
BraA06g029160.3C	A06:20217294-20219510	-1.23218	Down		BraA01g014580.3C	A01:7763832-7764643	No expression in control samples	Up
BraA06g029240.3C	A06:20272751-20274010	-0.825096	Down		BraA01g014750.3C	A01:7840691-7844238	4.4126	Up
BraA06g029380.3C	A06:20369851-20371744	-1.37088	Down		BraA01g014850.3C	A01:7894936-7897333	2.18993	Up
BraA06g029580.3C	A06:20427141-20430512	-1.14299	Down		BraA01g015390.3C	A01:8173795-8176991	2.94108	Up
BraA06g030530.3C	A06:21159798-21160217	-1.12809	Down		BraA01g016090.3C	A01:8506055-8508753	2.77109	Up
BraA06g030540.3C	A06:21161122-21163446	-0.845354	Down		BraA01g016360.3C	A01:8681118-8683226	2.39435	Up
BraA06g030590.3C	A06:21188398-21189520	-0.85638	Down		BraA01g016690.3C	A01:8842090-8846761	3.75429	Up
BraA06g031080.3C	A06:21407508-21409223	-0.785561	Down		BraA01g016850.3C	A01:8962589-8964911	2.07849	Up
BraA06g031150.3C	A06:21440873-21442386	-0.838676	Down		BraA01g016880.3C	A01:8971890-8972745	2.79541	Up
BraA06g031510.3C	A06:21712322-21716584	-2.26891	Down		BraA01g017070.3C	A01:9081861-9083895	3.0218	Up
BraA06g031670.3C	A06:21809336-21811920	-1.37146	Down		BraA01g017170.3C	A01:9144365-9146604	2.5091	Up
BraA06g031690.3C	A06:21823552-21832838	-0.781524	Down		BraA01g017260.3C	A01:9186102-9189387	2.82827	Up
BraA06g031840.3C	A06:21907048-21907927	-1.11013	Down		BraA01g017270.3C	A01:9190086-9191415	6.24245	Up
BraA06g032020.3C	A06:22031593-22031875	-1.95888	Down		BraA01g017420.3C	A01:9284446-9285590	3.70012	Up
BraA06g032170.3C	A06:22140867-22143577	-1.3148	Down		BraA01g017530.3C	A01:9341614-9343070	2.40553	Up
BraA06g032670.3C	A06:22403301-22405262	-1.16079	Down		BraA01g018040.3C	A01:9609284-9617362	2.95213	Up
BraA06g032950.3C	A06:22562557-22563232	-1.78961	Down		BraA01g018190.3C	A01:9689818-9691407	4.81336	Up
BraA06g032990.3C	A06:22587321-22590834	-1.1887	Down		BraA01g018590.3C	A01:9901180-9902307	2.78239	Up
BraA06g033010.3C	A06:22597174-22599369	-1.42612	Down		BraA01g019870.3C	A01:10666522-10667574	2.47972	Up
BraA06g033140.3C	A06:22658302-22661082	-1.03295	Down		BraA01g020590.3C	A01:11092748-11094689	4.09112	Up
BraA06g033240.3C	A06:22740916-22745948	-0.873135	Down		BraA01g020810.3C	A01:11292103-11292517	2.93964	Up
BraA06g033510.3C	A06:22891565-22893503	-1.06732	Down		BraA01g021640.3C	A01:11882169-11882577	2.42258	Up
BraA06g034310.3C	A06:23339301-23340183	-2.33177	Down		BraA01g023890.3C	A01:13786340-13788876	7.03746	Up
BraA06g034700.3C	A06:23567486-23569536	-2.4911	Down		BraA01g023930.3C	A01:13834274-13835215	2.18727	Up
BraA06g034760.3C	A06:23612697-23616796	-3.11061	Down		BraA01g024750.3C	A01:14504387-14506444	3.03247	Up
BraA06g034790.3C	A06:23626931-23629747	-6.03397	Down		BraA01g024760.3C	A01:14512915-14514889	4.1105	Up
BraA06g034910.3C	A06:23691089-23693020	-1.00776	Down		BraA01g025870.3C	A01:15696232-15697318	2.1041	Up
BraA06g035070.3C	A06:23761597-23764313	-1.53154	Down		BraA01g027880.3C	A01:18106543-18109059	3.08258	Up
BraA06g035130.3C	A06:23790137-23791503	-1.19148	Down		BraA01g029770.3C	A01:19899484-19901524	2.89256	Up
BraA06g035180.3C	A06:23826322-23828325	-1.12592	Down		BraA01g031330.3C	A01:21206524-21208961	4.46478	Up
BraA06g035230.3C	A06:23856827-23858824	-1.19444	Down		BraA01g031780.3C	A01:21610378-21611164	3.64842	Up
BraA06g035270.3C	A06:23877066-23879137	-1.18295	Down		BraA01g033520.3C	A01:22915800-22917210	2.31646	Up
BraA06g035320.3C	A06:23895336-23896116	-1.06734	Down		BraA01g034450.3C	A01:23616118-23620279	3.05839	Up
BraA06g035430.3C	A06:23934834-23935706	-1.33235	Down		BraA01g034580.3C	A01:23681520-23682666	2.5298	Up
BraA06g035640.3C	A06:24020195-24022852	-1.4855	Down		BraA01g035420.3C	A01:24249026-24250294	2.28219	Up
BraA06g035880.3C	A06:24137083-24139209	-0.975048	Down		BraA01g035500.3C	A01:24298450-24299433	2.62051	Up
BraA06g035990.3C	A06:24182286-24187760	-1.03918	Down		BraA01g035530.3C	A01:24318089-24319073	3.04334	Up
BraA06g036240.3C	A06:24372588-24375207	-2.02429	Down		BraA01g036530.3C	A01:24881785-24882885	2.73066	Up
BraA06g036270.3C	A06:24428579-24430866	-2.30335	Down		BraA01g036690.3C	A01:25002903-25004063	2.57685	Up
BraA06g036510.3C	A06:24508201-24509626	-0.724769	Down		BraA01g037040.3C	A01:25173003-25181919	4.70164	Up
BraA06g036760.3C	A06:24665305-24671493	-1.321	Down		BraA01g037130.3C	A01:25233129-25235162	2.12106	Up
BraA06g037260.3C	A06:24901316-24903395	-1.29134	Down		BraA01g037350.3C	A01:25408629-25411579	3.50865	Up
BraA06g037520.3C	A06:25064740-25066282	-1.83698	Down		BraA01g037360.3C	A01:25419111-25427462	6.03406	Up
BraA06g037530.3C	A06:25072360-25077814	-1.01942	Down		BraA01g037450.3C	A01:25501715-25503052	4.0158	Up
BraA06g037640.3C	A06:25140917-25141852	-2.06972	Down		BraA01g038070.3C	A01:25882493-25883001	No expression in control samples	Up
BraA06g037660.3C	A06:25144254-25145383	-1.91558	Down		BraA01g039270.3C	A01:26464523-26476955	2.47366	Up
BraA06g037830.3C	A06:25231900-25234792	-1.6212	Down		BraA01g039470.3C	A01:26596383-26597019	2.19564	Up
BraA06g037850.3C	A06:25247156-25251192	-1.07137	Down		BraA01g039580.3C	A01:26660702-26661975	2.23321	Up
BraA06g037940.3C	A06:25278203-25278802	-1.8975	Down		BraA01g040870.3C	A01:27475368-27477395	2.04101	Up
BraA06g038130.3C	A06:25368384-25370015	-1.635	Down		BraA01g041110.3C	A01:27605483-27606515	2.02416	Up
BraA06g038180.3C	A06:25394467-25395499	-0.95021	Down		BraA01g041370.3C	A01:27742278-27743659	2.49609	Up
BraA06g038250.3C	A06:25434833-25435912	-1.22194	Down		BraA01g041860.3C	A01:27987374-27988870	2.20192	Up
BraA06g038360.3C	A06:25487449-25489821	-0.83242	Down		BraA01g041870.3C	A01:27989292-27989570	2.26977	Up
BraA06g038520.3C	A06:25620543-25622036	-1.37827	Down		BraA01g043070.3C	A01:28659713-28661126	3.86424	Up
BraA06g038590.3C	A06:25648651-25649608	-0.838543	Down		BraA01g043160.3C	A01:28701436-28701877	2.08842	Up
BraA06g038600.3C	A06:25662614-25664516	-1.65407	Down		BraA01g043170.3C	A01:28703141-28705277	2.34965	Up
BraA06g038610.3C	A06:25670682-25671639	-1.30174	Down		BraA01g043990.3C	A01:29109818-29110379	2.29266	Up
BraA06g038830.3C	A06:25863710-25865547	-0.899175	Down		BraA01g044060.3C	A01:29144780-29145579	2.0634	Up
BraA06g038900.3C	A06:25941222-25943743	-1.07505	Down		BraA01g044200.3C	A01:29181322-29182142	2.39516	Up
BraA06g038960.3C	A06:25986608-25988527	-2.04351	Down		BraA01g044540.3C	A01:29374225-29375278	2.11574	Up
BraA06g039130.3C	A06:26088219-26090140	-1.8607	Down		BraA01g044920.3C	A01:29562888-29570258	3.95139	Up
BraA06g039940.3C	A06:26543449-26546079	-0.956668	Down		BraA02g000180.3C	A02:151325-156909	2.92443	Up
BraA06g040040.3C	A06:26628547-26629069	-0.948517	Down		BraA02g000630.3C	A02:369628-372371	4.2791	Up
BraA06g040070.3C	A06:26644481-26648928	-1.65996	Down		BraA02g000680.3C	A02:391199-392042	2.2763	Up
BraA06g040570.3C	A06:26948611-26950898	-0.705214	Down		BraA02g000820.3C	A02:441794-443689	3.33178	Up
BraA06g040710.3C	A06:27015828-27018096	-1.14558	Down		BraA02g001480.3C	A02:768790-769201	2.22885	Up
BraA06g040720.3C	A06:27036430-27036886	-1.43795	Down		BraA02g002620.3C	A02:1311451-1313085	3.19606	Up
BraA06g040800.3C	A06:27062461-27065210	-1.00773	Down		BraA02g002770.3C	A02:1360903-1361814	2.3565	Up
BraA06g040970.3C	A06:27128008-27129449	-1.10165	Down		BraA02g003430.3C	A02:1681471-1682566	2.37352	Up
BraA06g041040.3C	A06:27147775-27149600	-1.36869	Down		BraA02g003600.3C	A02:1764777-1766746	2.39598	Up
BraA06g041130.3C	A06:27177052-27178587	-1.03683	Down		BraA02g003610.3C	A02:1770297-1771825	2.14529	Up
BraA06g041390.3C	A06:27313573-27320830	-1.7489	Down		BraA02g003740.3C	A02:1809126-1811347	3.6836	Up
BraA06g041640.3C	A06:27430086-27431880	-1.26138	Down		BraA02g003760.3C	A02:1818759-1819332	3.08995	Up
BraA06g041720.3C	A06:27465334-27466426	-1.8216	Down		BraA02g004390.3C	A02:2117802-2118276	2.53728	Up
BraA06g041900.3C	A06:27565415-27567430	-1.58867	Down		BraA02g004570.3C	A02:2199830-2200949	2.3148	Up
BraA06g041980.3C	A06:27604599-27606996	-1.75288	Down		BraA02g004880.3C	A02:2373545-2375311	2.09104	Up
BraA06g042380.3C	A06:27812693-27814536	-3.65773	Down		BraA02g004950.3C	A02:2394981-2395647	2.49079	Up
BraA06g042470.3C	A06:27843432-27847400	-1.35639	Down		BraA02g005070.3C	A02:2443273-2445835	2.69803	Up
BraA06g042570.3C	A06:27887838-27890880	-1.39361	Down		BraA02g005320.3C	A02:2527928-2529785	2.30551	Up
BraA06g042710.3C	A06:27963986-27965976	-1.38441	Down		BraA02g005540.3C	A02:2623330-2624856	2.99065	Up
BraA06g042910.3C	A06:28105543-28107756	-1.24554	Down		BraA02g005710.3C	A02:2713699-2714724	2.36388	Up
BraA06g043010.3C	A06:28145071-28148389	-1.06033	Down		BraA02g005730.3C	A02:2716356-2719205	2.41014	Up
BraA06g043050.3C	A06:28169802-28171538	-0.948087	Down		BraA02g006180.3C	A02:2941182-2942396	2.55519	Up
BraA06g043530.3C	A06:28408150-28411281	-1.10041	Down		BraA02g006550.3C	A02:3090743-3093090	2.6367	Up
BraA06g043600.3C	A06:28444323-28447165	-2.7089	Down		BraA02g007460.3C	A02:3503406-3503706	2.86021	Up
BraA06g043640.3C	A06:28477229-28479872	-1.59679	Down		BraA02g007500.3C	A02:3508319-3508619	3.46787	Up
BraA06g043760.3C	A06:28543298-28545172	-1.80342	Down		BraA02g008020.3C	A02:3802546-3803053	2.48477	Up
BraA06g044040.3C	A06:28667156-28669371	-0.861875	Down		BraA02g008230.3C	A02:3925387-3927123	3.11603	Up
BraA06g044090.3C	A06:28701582-28703824	-1.27756	Down		BraA02g008250.3C	A02:3934875-3937122	4.1832	Up
BraA06g044120.3C	A06:28715649-28716751	-1.80252	Down		BraA02g008300.3C	A02:3953969-3954419	2.23172	Up
BraA06g044170.3C	A06:28734609-28741311	-0.713457	Down		BraA02g009000.3C	A02:4231794-4232433	4.00639	Up
BraA06g044370.3C	A06:28889050-28890462	-1.3337	Down		BraA02g009700.3C	A02:4614117-4615887	2.47384	Up
BraA06g044510.3C	A06:28935310-28941466	-0.857314	Down		BraA02g009940.3C	A02:4740945-4742519	2.06168	Up
BraA06g044590.3C	A06:28968045-28970276	-1.46794	Down		BraA02g010850.3C	A02:5306807-5310614	2.63319	Up
BraA06g044720.3C	A06:29015609-29018333	-2.21732	Down		BraA02g011140.3C	A02:5428999-5429494	2.32808	Up
BraA06g044730.3C	A06:29018363-29018591	-2.62662	Down		BraA02g011180.3C	A02:5444312-5445005	3.9456	Up
BraA06g044860.3C	A06:29102876-29105219	-0.863443	Down		BraA02g011840.3C	A02:5735487-5736113	4.12689	Up
BraA06g044870.3C	A06:29110443-29111678	-2.52294	Down		BraA02g012390.3C	A02:6077741-6078278	2.98445	Up
BraA07g000510.3C	A07:259921-264638	-1.53166	Down		BraA02g013170.3C	A02:6653528-6654164	2.42458	Up
BraA07g000940.3C	A07:646042-649112	-1.2849	Down		BraA02g013680.3C	A02:6965347-6967174	4.1283	Up
BraA07g001340.3C	A07:991330-993839	-0.992542	Down		BraA02g013760.3C	A02:7010299-7012158	2.60637	Up
BraA07g001780.3C	A07:1291870-1297278	-0.738487	Down		BraA02g013770.3C	A02:7013890-7015369	2.44378	Up
BraA07g001870.3C	A07:1400306-1402497	-1.57867	Down		BraA02g013870.3C	A02:7078467-7079729	2.93948	Up
BraA07g001900.3C	A07:1425534-1428202	-0.852452	Down		BraA02g014000.3C	A02:7164544-7167387	3.18616	Up
BraA07g001990.3C	A07:1465259-1468141	-0.951406	Down		BraA02g015150.3C	A02:7899213-7901315	3.15318	Up
BraA07g002180.3C	A07:1645118-1646594	-2.2139	Down		BraA02g015410.3C	A02:8060005-8061028	No expression in control samples	Up
BraA07g002450.3C	A07:1886414-1887774	-0.900819	Down		BraA02g016320.3C	A02:8679764-8680852	No expression in control samples	Up
BraA07g002590.3C	A07:1969498-1970005	-0.838858	Down		BraA02g016780.3C	A02:8974302-8979226	2.52585	Up
BraA07g002660.3C	A07:2047288-2048843	-1.36993	Down		BraA02g016840.3C	A02:9016734-9019371	3.41787	Up
BraA07g002760.3C	A07:2112607-2113728	No expression in ionculated samples	Down		BraA02g016970.3C	A02:9111779-9113778	2.16443	Up
BraA07g003100.3C	A07:2360489-2366125	-1.32074	Down		BraA02g017120.3C	A02:9253135-9254543	2.92567	Up
BraA07g003790.3C	A07:2884412-2885489	-1.4829	Down		BraA02g017140.3C	A02:9283952-9284291	2.06286	Up
BraA07g003930.3C	A07:3006638-3009789	-0.904678	Down		BraA02g017230.3C	A02:9396152-9412578	3.79893	Up
BraA07g004130.3C	A07:3152141-3158055	-0.992473	Down		BraA02g017380.3C	A02:9517518-9520128	2.31126	Up
BraA07g004150.3C	A07:3166472-3171734	-1.0203	Down		BraA02g017620.3C	A02:9758903-9759179	2.09946	Up
BraA07g004250.3C	A07:3245073-3246553	-0.996497	Down		BraA02g017920.3C	A02:9969001-9969995	2.74921	Up
BraA07g004470.3C	A07:3415148-3416321	-1.09472	Down		BraA02g018000.3C	A02:9990204-9991481	5.41182	Up
BraA07g004540.3C	A07:3500112-3501636	-1.36478	Down		BraA02g018090.3C	A02:10038594-10045059	4.15324	Up
BraA07g004820.3C	A07:3667233-3668516	-1.03891	Down		BraA02g018470.3C	A02:10347551-10348970	2.66451	Up
BraA07g005100.3C	A07:3955384-3957365	-1.29122	Down		BraA02g019700.3C	A02:11314429-11317168	3.8582	Up
BraA07g005280.3C	A07:4115948-4116927	-1.01692	Down		BraA02g020240.3C	A02:11699241-11700021	2.6048	Up
BraA07g005530.3C	A07:4427497-4428883	-1.08748	Down		BraA02g020970.3C	A02:12241748-12243418	2.2659	Up
BraA07g006180.3C	A07:5256037-5256310	No expression in ionculated samples	Down		BraA02g021250.3C	A02:12446286-12448300	2.08739	Up
BraA07g006630.3C	A07:6476642-6477503	No expression in ionculated samples	Down		BraA02g021420.3C	A02:12568430-12569683	2.10542	Up
BraA07g007560.3C	A07:7754874-7759914	-0.930742	Down		BraA02g021660.3C	A02:12652414-12653244	2.53885	Up
BraA07g007660.3C	A07:7874658-7875590	-0.883597	Down		BraA02g021970.3C	A02:12819798-12822852	2.66633	Up
BraA07g008080.3C	A07:8175213-8176014	-0.947024	Down		BraA02g022730.3C	A02:13274562-13276247	2.56472	Up
BraA07g008290.3C	A07:8354249-8355377	-1.07564	Down		BraA02g024660.3C	A02:14684708-14685053	2.10796	Up
BraA07g008650.3C	A07:8654102-8656396	-2.21134	Down		BraA02g024800.3C	A02:14825664-14826939	2.92119	Up
BraA07g008810.3C	A07:8845944-8848707	-1.73993	Down		BraA02g025470.3C	A02:15297305-15297925	3.30957	Up
BraA07g009000.3C	A07:9028135-9029521	-1.14168	Down		BraA02g025660.3C	A02:15414449-15415476	2.32106	Up
BraA07g009350.3C	A07:9291101-9293918	-1.04398	Down		BraA02g026560.3C	A02:15935240-15938640	4.88337	Up
BraA07g009370.3C	A07:9302416-9303456	-2.28731	Down		BraA02g027150.3C	A02:16535732-16546574	3.6526	Up
BraA07g009510.3C	A07:9466644-9472043	-1.41283	Down		BraA02g027370.3C	A02:16699272-16701842	4.68746	Up
BraA07g009550.3C	A07:9498478-9504199	-0.827386	Down		BraA02g027990.3C	A02:17279375-17281933	3.61901	Up
BraA07g009830.3C	A07:9772286-9774553	-0.936283	Down		BraA02g028350.3C	A02:17658301-17659530	2.02495	Up
BraA07g010050.3C	A07:9927767-9929252	-1.0599	Down		BraA02g030680.3C	A02:20888529-20891389	2.20941	Up
BraA07g010520.3C	A07:10388797-10394615	-1.08764	Down		BraA02g031420.3C	A02:21470472-21472561	2.03315	Up
BraA07g010550.3C	A07:10411911-10422905	-1.45062	Down		BraA02g031540.3C	A02:21560903-21563918	2.61584	Up
BraA07g010750.3C	A07:10615543-10616227	-1.75443	Down		BraA02g031860.3C	A02:21879252-21888166	3.12653	Up
BraA07g011060.3C	A07:10910925-10912645	-0.937867	Down		BraA02g032010.3C	A02:21992830-21995299	2.1086	Up
BraA07g011710.3C	A07:11433430-11436894	-1.40473	Down		BraA02g032020.3C	A02:21996293-21998873	2.05089	Up
BraA07g011790.3C	A07:11504223-11507240	-1.02319	Down		BraA02g032030.3C	A02:22005138-22006269	3.92919	Up
BraA07g011920.3C	A07:11610008-11610878	-0.83096	Down		BraA02g032320.3C	A02:22258771-22260232	2.17656	Up
BraA07g011930.3C	A07:11613310-11617970	-2.15973	Down		BraA02g034480.3C	A02:23830562-23831804	2.11586	Up
BraA07g012230.3C	A07:11783641-11785017	-1.57522	Down		BraA02g034590.3C	A02:23901312-23902422	2.99661	Up
BraA07g012270.3C	A07:11802022-11808877	-1.13858	Down		BraA02g035070.3C	A02:24264992-24265302	3.17645	Up
BraA07g012360.3C	A07:11854262-11857176	-1.15926	Down		BraA02g036650.3C	A02:25571623-25571974	3.2752	Up
BraA07g012620.3C	A07:12028735-12031286	-1.43375	Down		BraA02g037570.3C	A02:26322135-26322702	2.73125	Up
BraA07g013200.3C	A07:12361963-12362916	-1.39279	Down		BraA02g037700.3C	A02:26396604-26399692	3.85213	Up
BraA07g013540.3C	A07:12614655-12615804	-1.02299	Down		BraA02g037750.3C	A02:26416353-26419151	2.22171	Up
BraA07g014270.3C	A07:13013082-13013751	-2.21076	Down		BraA02g037860.3C	A02:26487363-26488247	2.28018	Up
BraA07g014340.3C	A07:13086700-13090857	-0.727311	Down		BraA02g037930.3C	A02:26518185-26518767	2.17249	Up
BraA07g014390.3C	A07:13121988-13124153	-2.96166	Down		BraA02g038500.3C	A02:26842900-26844457	3.4384	Up
BraA07g015550.3C	A07:13949538-13952855	-1.19885	Down		BraA02g038540.3C	A02:26858683-26858947	No expression in control samples	Up
BraA07g016000.3C	A07:14171313-14171895	-2.49503	Down		BraA02g039460.3C	A02:27491459-27492512	No expression in control samples	Up
BraA07g016800.3C	A07:14696515-14697669	-1.87636	Down		BraA02g040140.3C	A02:27876285-27880717	3.0059	Up
BraA07g017000.3C	A07:14800377-14802670	-2.49293	Down		BraA02g040390.3C	A02:28073420-28077060	5.08859	Up
BraA07g017010.3C	A07:14809266-14814166	-1.422	Down		BraA02g041220.3C	A02:28603539-28605425	5.60912	Up
BraA07g017760.3C	A07:15230563-15235850	-1.4081	Down		BraA02g041340.3C	A02:28673778-28674332	No expression in control samples	Up
BraA07g018060.3C	A07:15460573-15463349	-0.83914	Down		BraA02g041770.3C	A02:28951766-28952144	2.3731	Up
BraA07g018590.3C	A07:15799320-15800187	-1.38561	Down		BraA02g042070.3C	A02:29195092-29203515	4.33473	Up
BraA07g018670.3C	A07:15865434-15869061	-1.57197	Down		BraA02g042310.3C	A02:29392558-29398037	2.25656	Up
BraA07g018970.3C	A07:16103708-16105022	-0.937022	Down		BraA02g042590.3C	A02:29552701-29556542	2.10755	Up
BraA07g019130.3C	A07:16254678-16258663	-1.17927	Down		BraA02g042670.3C	A02:29607153-29611410	4.04429	Up
BraA07g019170.3C	A07:16279651-16281969	-0.885016	Down		BraA02g042960.3C	A02:29801662-29803298	2.76009	Up
BraA07g019660.3C	A07:16508538-16511671	-1.51888	Down		BraA02g043500.3C	A02:30129558-30130527	2.97872	Up
BraA07g020140.3C	A07:16794916-16804206	-1.00799	Down		BraA02g043630.3C	A02:30196881-30197487	2.96444	Up
BraA07g020350.3C	A07:16928789-16931866	-1.86092	Down		BraA02g044590.3C	A02:30702812-30708323	3.19033	Up
BraA07g020650.3C	A07:17116935-17121824	-0.850972	Down		BraA02g044640.3C	A02:30737444-30739142	3.08689	Up
BraA07g020950.3C	A07:17285991-17288902	-0.745683	Down		BraA03g000150.3C	A03:57308-58725	2.54133	Up
BraA07g021020.3C	A07:17338173-17339838	-0.878196	Down		BraA03g000500.3C	A03:215354-216348	2.86115	Up
BraA07g021590.3C	A07:17609009-17609888	-1.48084	Down		BraA03g001360.3C	A03:616918-617113	2.23168	Up
BraA07g021740.3C	A07:17675523-17677364	-1.60464	Down		BraA03g001720.3C	A03:801153-801561	2.76242	Up
BraA07g021770.3C	A07:17685719-17688341	-0.983692	Down		BraA03g002110.3C	A03:948624-951484	2.55448	Up
BraA07g022350.3C	A07:18028114-18028973	-1.49787	Down		BraA03g002840.3C	A03:1250441-1252141	2.59519	Up
BraA07g022530.3C	A07:18157934-18158866	-0.814781	Down		BraA03g002970.3C	A03:1324285-1325184	2.33038	Up
BraA07g022570.3C	A07:18172661-18174474	-1.08839	Down		BraA03g003200.3C	A03:1425756-1427172	4.3061	Up
BraA07g022810.3C	A07:18296355-18301392	-0.961884	Down		BraA03g004740.3C	A03:2066828-2070393	6.16091	Up
BraA07g023180.3C	A07:18510487-18512302	-1.51513	Down		BraA03g005410.3C	A03:2350264-2352645	2.10449	Up
BraA07g023260.3C	A07:18550979-18552767	-1.49852	Down		BraA03g006020.3C	A03:2645745-2649213	3.72421	Up
BraA07g023610.3C	A07:18759718-18763240	-2.17555	Down		BraA03g006230.3C	A03:2725328-2726080	2.10271	Up
BraA07g023780.3C	A07:18836936-18838468	-1.0602	Down		BraA03g008380.3C	A03:3592858-3593914	2.87959	Up
BraA07g024150.3C	A07:18998282-19001907	-1.36468	Down		BraA03g008660.3C	A03:3713824-3714133	4.32813	Up
BraA07g024210.3C	A07:19033712-19034863	-1.06629	Down		BraA03g009000.3C	A03:3866072-3871073	4.68514	Up
BraA07g024950.3C	A07:19396816-19399636	-0.893184	Down		BraA03g009200.3C	A03:3943748-3948866	4.84166	Up
BraA07g024960.3C	A07:19409579-19410440	-1.237	Down		BraA03g009760.3C	A03:4193407-4198109	2.71943	Up
BraA07g026310.3C	A07:20079603-20081653	-1.7569	Down		BraA03g009900.3C	A03:4251059-4254853	2.23402	Up
BraA07g026510.3C	A07:20168344-20169664	-1.9249	Down		BraA03g010090.3C	A03:4340706-4345940	2.35973	Up
BraA07g026730.3C	A07:20268925-20269679	-1.7679	Down		BraA03g010380.3C	A03:4464165-4465436	2.67796	Up
BraA07g027010.3C	A07:20453825-20460875	-0.939782	Down		BraA03g010480.3C	A03:4533915-4535805	3.3649	Up
BraA07g027110.3C	A07:20517527-20520126	-1.01643	Down		BraA03g011090.3C	A03:4781619-4783657	2.22135	Up
BraA07g027230.3C	A07:20608789-20609806	-4.62553	Down		BraA03g011150.3C	A03:4812468-4813397	2.09652	Up
BraA07g027560.3C	A07:20771169-20773407	-1.02128	Down		BraA03g011450.3C	A03:4950634-4951341	3.81288	Up
BraA07g027760.3C	A07:20897899-20899529	-1.26275	Down		BraA03g011540.3C	A03:4986377-4986871	3.61093	Up
BraA07g027830.3C	A07:20959319-20962207	-1.2158	Down		BraA03g012070.3C	A03:5181745-5182339	3.77967	Up
BraA07g027870.3C	A07:20979130-20980699	-0.95653	Down		BraA03g012500.3C	A03:5367389-5369129	2.20641	Up
BraA07g028040.3C	A07:21035768-21038766	-0.828746	Down		BraA03g012750.3C	A03:5478718-5482754	2.58491	Up
BraA07g028110.3C	A07:21058634-21061121	-0.965702	Down		BraA03g013440.3C	A03:5872513-5872813	No expression in control samples	Up
BraA07g028190.3C	A07:21117092-21118376	-0.91536	Down		BraA03g013750.3C	A03:6008959-6012651	4.37339	Up
BraA07g028570.3C	A07:21259454-21260817	-1.14708	Down		BraA03g013870.3C	A03:6075625-6076757	2.71001	Up
BraA07g028600.3C	A07:21274359-21277308	-1.17479	Down		BraA03g014820.3C	A03:6612391-6613025	3.66417	Up
BraA07g028930.3C	A07:21411207-21414382	-1.2058	Down		BraA03g015360.3C	A03:6870826-6872155	No expression in control samples	Up
BraA07g028970.3C	A07:21431892-21434484	-1.03206	Down		BraA03g015450.3C	A03:6907333-6907666	No expression in control samples	Up
BraA07g029460.3C	A07:21749871-21752989	-1.1143	Down		BraA03g016290.3C	A03:7535481-7538139	2.37511	Up
BraA07g029730.3C	A07:21868129-21870465	-1.42495	Down		BraA03g016420.3C	A03:7602020-7602889	2.40165	Up
BraA07g029790.3C	A07:21901235-21901737	-2.54482	Down		BraA03g016480.3C	A03:7625084-7625300	4.66323	Up
BraA07g029880.3C	A07:21948055-21952136	-1.2175	Down		BraA03g016590.3C	A03:7679072-7682994	2.11184	Up
BraA07g030020.3C	A07:21995603-21996943	-1.54747	Down		BraA03g016620.3C	A03:7690766-7692345	2.02141	Up
BraA07g030330.3C	A07:22191928-22193642	-1.35593	Down		BraA03g016800.3C	A03:7793476-7794861	2.20416	Up
BraA07g030350.3C	A07:22201400-22210761	-0.959059	Down		BraA03g017970.3C	A03:8379159-8381909	2.57377	Up
BraA07g030370.3C	A07:22224667-22227518	-1.45928	Down		BraA03g018080.3C	A03:8434313-8435114	3.00021	Up
BraA07g030620.3C	A07:22391693-22394242	-1.32216	Down		BraA03g018890.3C	A03:8869189-8871699	2.40386	Up
BraA07g030720.3C	A07:22447024-22448454	-0.956509	Down		BraA03g019340.3C	A03:9138607-9140307	2.63507	Up
BraA07g030920.3C	A07:22566235-22568196	-1.63268	Down		BraA03g019380.3C	A03:9162715-9163216	2.35916	Up
BraA07g031010.3C	A07:22625212-22630264	-2.43802	Down		BraA03g019610.3C	A03:9298021-9301355	2.36381	Up
BraA07g031150.3C	A07:22699889-22701398	-0.982262	Down		BraA03g019690.3C	A03:9353881-9354115	No expression in control samples	Up
BraA07g031200.3C	A07:22729557-22733753	-0.944425	Down		BraA03g021180.3C	A03:10106724-10108353	2.40609	Up
BraA07g031570.3C	A07:22935112-22939941	-1.25589	Down		BraA03g021430.3C	A03:10250315-10250954	3.74345	Up
BraA07g032570.3C	A07:23488811-23490071	-0.909605	Down		BraA03g021940.3C	A03:10532311-10532829	3.17495	Up
BraA07g033010.3C	A07:23708681-23710435	-1.53429	Down		BraA03g022260.3C	A03:10701288-10701489	No expression in control samples	Up
BraA07g033330.3C	A07:23834687-23836680	-1.33816	Down		BraA03g022840.3C	A03:10985455-10986575	3.46525	Up
BraA07g033570.3C	A07:23950994-23951903	-3.02889	Down		BraA03g023180.3C	A03:11130989-11132732	2.43179	Up
BraA07g033640.3C	A07:24007211-24008126	-1.24537	Down		BraA03g023560.3C	A03:11300426-11303680	2.46846	Up
BraA07g033670.3C	A07:24040120-24045889	-1.87601	Down		BraA03g023620.3C	A03:11335729-11336125	2.54229	Up
BraA07g034110.3C	A07:24289207-24290188	-1.93567	Down		BraA03g023920.3C	A03:11787058-11788693	3.28474	Up
BraA07g034290.3C	A07:24387654-24388656	-1.15236	Down		BraA03g024700.3C	A03:12137500-12138259	3.9037	Up
BraA07g034300.3C	A07:24392688-24395521	-1.01165	Down		BraA03g024740.3C	A03:12146243-12147412	2.55018	Up
BraA07g034440.3C	A07:24466796-24467770	-2.84899	Down		BraA03g024980.3C	A03:12306202-12308224	3.05132	Up
BraA07g034670.3C	A07:24622596-24623423	-0.927025	Down		BraA03g025000.3C	A03:12319603-12320251	2.50903	Up
BraA07g034740.3C	A07:24667506-24672067	-2.40613	Down		BraA03g025370.3C	A03:12501172-12502548	2.3136	Up
BraA07g034800.3C	A07:24697977-24698910	-2.31815	Down		BraA03g025550.3C	A03:12615272-12617605	2.89311	Up
BraA07g034810.3C	A07:24700164-24701095	-1.51021	Down		BraA03g025970.3C	A03:12832153-12838637	3.28931	Up
BraA07g034830.3C	A07:24706566-24707404	-3.3807	Down		BraA03g026030.3C	A03:12872927-12877478	2.63015	Up
BraA07g034950.3C	A07:24756673-24759072	-0.858242	Down		BraA03g026060.3C	A03:12891986-12892939	2.80317	Up
BraA07g035070.3C	A07:24814629-24815951	-1.93595	Down		BraA03g026770.3C	A03:13243079-13244851	4.43861	Up
BraA07g035090.3C	A07:24823201-24825270	-1.12794	Down		BraA03g027040.3C	A03:13374987-13377852	2.55242	Up
BraA07g035100.3C	A07:24828650-24832928	-1.03137	Down		BraA03g027260.3C	A03:13489259-13490202	3.42736	Up
BraA07g035160.3C	A07:24890798-24891602	-1.87365	Down		BraA03g027490.3C	A03:13631258-13631927	4.70638	Up
BraA07g035170.3C	A07:24896999-24900032	-0.952339	Down		BraA03g027780.3C	A03:13837940-13839816	2.16622	Up
BraA07g035410.3C	A07:25013668-25015105	-0.848095	Down		BraA03g027930.3C	A03:13928649-13929150	No expression in control samples	Up
BraA07g035620.3C	A07:25125993-25128687	-2.10436	Down		BraA03g027960.3C	A03:13950520-13950922	3.51757	Up
BraA07g036550.3C	A07:25586582-25588642	-0.811788	Down		BraA03g028010.3C	A03:13996802-13997615	2.31127	Up
BraA07g036690.3C	A07:25658980-25662244	-0.887327	Down		BraA03g028090.3C	A03:14041695-14045377	2.78021	Up
BraA07g036830.3C	A07:25727764-25728121	-1.16795	Down		BraA03g028470.3C	A03:14255045-14255835	3.57472	Up
BraA07g037090.3C	A07:25856009-25857743	-0.837977	Down		BraA03g028740.3C	A03:14387992-14392646	2.8223	Up
BraA07g037700.3C	A07:26096715-26101314	-1.27008	Down		BraA03g028810.3C	A03:14420770-14423419	3.30712	Up
BraA07g037780.3C	A07:26144124-26146164	-0.86209	Down		BraA03g028960.3C	A03:14497015-14497957	3.13593	Up
BraA07g038260.3C	A07:26342741-26345652	-1.9769	Down		BraA03g029060.3C	A03:14557245-14558351	No expression in control samples	Up
BraA07g038310.3C	A07:26364990-26366361	-1.21338	Down		BraA03g029360.3C	A03:14752369-14754090	2.33342	Up
BraA07g038370.3C	A07:26398133-26399282	-2.12087	Down		BraA03g029650.3C	A03:14919913-14920627	2.29801	Up
BraA07g038530.3C	A07:26518068-26520813	-0.968846	Down		BraA03g030290.3C	A03:15238047-15239393	2.65568	Up
BraA07g038770.3C	A07:26616272-26617385	-1.68172	Down		BraA03g030510.3C	A03:15312941-15313542	2.31196	Up
BraA07g038790.3C	A07:26620825-26623761	-0.865917	Down		BraA03g031020.3C	A03:15495923-15496723	2.76698	Up
BraA07g038980.3C	A07:26728484-26730548	-1.26326	Down		BraA03g031240.3C	A03:15565051-15566916	2.08093	Up
BraA07g039240.3C	A07:26868478-26868949	-1.6291	Down		BraA03g031380.3C	A03:15602641-15607451	2.24129	Up
BraA07g039250.3C	A07:26872809-26873943	-1.82899	Down		BraA03g031390.3C	A03:15614561-15615423	No expression in control samples	Up
BraA07g039280.3C	A07:26889724-26892309	-2.77792	Down		BraA03g031620.3C	A03:15715220-15719444	2.1853	Up
BraA07g039540.3C	A07:27045094-27045892	-1.96897	Down		BraA03g032190.3C	A03:15965828-15966788	2.53836	Up
BraA07g039630.3C	A07:27077057-27081708	-1.05643	Down		BraA03g032210.3C	A03:15970746-15972140	2.87487	Up
BraA07g039640.3C	A07:27081798-27084650	-0.806397	Down		BraA03g032410.3C	A03:16083500-16085218	2.43638	Up
BraA07g039900.3C	A07:27191762-27194987	-0.984527	Down		BraA03g032430.3C	A03:16091827-16094474	2.31282	Up
BraA07g040140.3C	A07:27274344-27276289	-2.14136	Down		BraA03g032880.3C	A03:16323394-16325075	2.93539	Up
BraA07g040280.3C	A07:27344867-27347277	-1.84274	Down		BraA03g033240.3C	A03:16484097-16484865	2.53371	Up
BraA07g040830.3C	A07:27635735-27638893	-2.31339	Down		BraA03g035590.3C	A03:17549463-17550343	No expression in control samples	Up
BraA07g041110.3C	A07:27773802-27785198	-1.64597	Down		BraA03g035740.3C	A03:17636918-17643140	2.36661	Up
BraA07g041120.3C	A07:27793705-27796715	-1.36757	Down		BraA03g036120.3C	A03:17850258-17851656	3.07296	Up
BraA07g041180.3C	A07:27824992-27827972	-1.93679	Down		BraA03g036380.3C	A03:17956160-17962323	3.8676	Up
BraA07g041350.3C	A07:27933835-27935627	-0.917275	Down		BraA03g036740.3C	A03:18156114-18158296	2.43491	Up
BraA07g041610.3C	A07:28060535-28062699	-1.34701	Down		BraA03g036940.3C	A03:18256571-18258194	3.92614	Up
BraA07g042450.3C	A07:28408633-28411085	-0.983907	Down		BraA03g037010.3C	A03:18301160-18301496	2.40554	Up
BraA07g042600.3C	A07:28474817-28476050	-1.2099	Down		BraA03g037180.3C	A03:18383559-18385153	2.97552	Up
BraA08g000300.3C	A08:198929-201182	-0.752475	Down		BraA03g037590.3C	A03:18624770-18625172	2.10216	Up
BraA08g000310.3C	A08:202435-204426	-0.979721	Down		BraA03g037700.3C	A03:18678691-18679321	No expression in control samples	Up
BraA08g000780.3C	A08:511170-511347	-0.988566	Down		BraA03g037790.3C	A03:18708137-18709368	6.16493	Up
BraA08g000810.3C	A08:524115-525618	-1.48394	Down		BraA03g037920.3C	A03:18751660-18753546	2.82315	Up
BraA08g000820.3C	A08:535549-536923	-1.63222	Down		BraA03g037950.3C	A03:18760010-18763637	3.35281	Up
BraA08g000860.3C	A08:581514-582084	-1.90669	Down		BraA03g038060.3C	A03:18828671-18831739	6.93758	Up
BraA08g001340.3C	A08:915780-917668	-1.30853	Down		BraA03g038100.3C	A03:18854941-18856003	No expression in control samples	Up
BraA08g001380.3C	A08:937929-941448	-1.71629	Down		BraA03g038130.3C	A03:18863620-18863949	3.7215	Up
BraA08g001520.3C	A08:1096204-1099561	-2.07888	Down		BraA03g038270.3C	A03:18935540-18937106	3.05955	Up
BraA08g002410.3C	A08:1752703-1754112	-2.34767	Down		BraA03g038530.3C	A03:19061521-19062172	2.79835	Up
BraA08g002610.3C	A08:1930142-1930634	-1.28391	Down		BraA03g038780.3C	A03:19199780-19204709	2.38794	Up
BraA08g003010.3C	A08:2235937-2237275	-2.54677	Down		BraA03g039020.3C	A03:19300807-19303256	5.09255	Up
BraA08g003420.3C	A08:2492363-2496102	-0.972445	Down		BraA03g039450.3C	A03:19530873-19531509	3.49539	Up
BraA08g003550.3C	A08:2598741-2600730	-1.73808	Down		BraA03g039760.3C	A03:19719062-19719384	No expression in control samples	Up
BraA08g004360.3C	A08:3228657-3228909	-1.37926	Down		BraA03g039800.3C	A03:19734883-19735192	No expression in control samples	Up
BraA08g005160.3C	A08:3903597-3905618	-1.31792	Down		BraA03g039820.3C	A03:19739656-19739965	3.99815	Up
BraA08g005490.3C	A08:4288129-4289757	-1.54832	Down		BraA03g040130.3C	A03:19928574-19941290	4.00606	Up
BraA08g005910.3C	A08:4705622-4708458	-1.07598	Down		BraA03g040230.3C	A03:19992210-19994700	2.34285	Up
BraA08g006560.3C	A08:5454879-5457736	-1.11487	Down		BraA03g040600.3C	A03:20211897-20213224	No expression in control samples	Up
BraA08g006740.3C	A08:5644235-5645308	-1.54033	Down		BraA03g040790.3C	A03:20355893-20356665	2.08447	Up
BraA08g006880.3C	A08:5788628-5790065	-1.81238	Down		BraA03g041310.3C	A03:20708195-20708411	3.68457	Up
BraA08g007260.3C	A08:6164580-6167770	-0.795913	Down		BraA03g041720.3C	A03:20933654-20933942	3.16366	Up
BraA08g007530.3C	A08:6623217-6625583	-2.10286	Down		BraA03g041940.3C	A03:21055367-21056251	5.02059	Up
BraA08g007700.3C	A08:6851454-6853696	-1.5378	Down		BraA03g042600.3C	A03:21387970-21388456	7.05929	Up
BraA08g007750.3C	A08:6885968-6895373	-1.11812	Down		BraA03g042950.3C	A03:21585675-21586641	3.66936	Up
BraA08g007990.3C	A08:7048770-7050587	-1.08407	Down		BraA03g042990.3C	A03:21596136-21596951	2.65769	Up
BraA08g008030.3C	A08:7070310-7073121	-3.13312	Down		BraA03g043170.3C	A03:21716066-21717153	3.71119	Up
BraA08g008440.3C	A08:7453610-7466938	-0.95036	Down		BraA03g043740.3C	A03:22089651-22094767	5.98448	Up
BraA08g008710.3C	A08:7698028-7700094	-1.35008	Down		BraA03g043750.3C	A03:22114596-22117013	2.35889	Up
BraA08g009450.3C	A08:8354022-8356335	-0.767426	Down		BraA03g044000.3C	A03:22254226-22255481	2.85048	Up
BraA08g010000.3C	A08:8787817-8792653	-1.76098	Down		BraA03g044520.3C	A03:22490875-22493066	2.5671	Up
BraA08g010080.3C	A08:8839707-8840850	-1.33076	Down		BraA03g044620.3C	A03:22530042-22530639	4.51186	Up
BraA08g011210.3C	A08:9824170-9827396	-1.37332	Down		BraA03g045230.3C	A03:22855758-22856370	3.06359	Up
BraA08g011260.3C	A08:9859195-9861343	-2.52782	Down		BraA03g045650.3C	A03:23079685-23080691	No expression in control samples	Up
BraA08g011880.3C	A08:10304596-10305569	-2.07332	Down		BraA03g045980.3C	A03:23252314-23253642	2.1071	Up
BraA08g011930.3C	A08:10398267-10399963	-1.3017	Down		BraA03g046010.3C	A03:23263995-23265174	2.47609	Up
BraA08g012010.3C	A08:10443089-10444182	-1.06584	Down		BraA03g046230.3C	A03:23405430-23409488	4.51169	Up
BraA08g012210.3C	A08:10603304-10605825	-1.70198	Down		BraA03g046340.3C	A03:23464436-23465991	No expression in control samples	Up
BraA08g012250.3C	A08:10626587-10628081	-1.19328	Down		BraA03g047190.3C	A03:23843351-23845562	2.16005	Up
BraA08g012630.3C	A08:10900484-10901063	-1.26777	Down		BraA03g047900.3C	A03:24221127-24223403	4.13707	Up
BraA08g013410.3C	A08:11491247-11493990	-2.34066	Down		BraA03g048080.3C	A03:24339446-24340147	2.15205	Up
BraA08g014010.3C	A08:11721874-11723706	-1.20614	Down		BraA03g048330.3C	A03:24490896-24492747	3.41767	Up
BraA08g014090.3C	A08:11763479-11766978	-1.3155	Down		BraA03g049040.3C	A03:24979419-24981260	2.10886	Up
BraA08g014880.3C	A08:12311150-12314030	-0.920459	Down		BraA03g049310.3C	A03:25148868-25149904	4.76405	Up
BraA08g015000.3C	A08:12383048-12387541	-1.83289	Down		BraA03g050570.3C	A03:25973754-25975413	2.2664	Up
BraA08g015390.3C	A08:12689798-12692324	-0.974315	Down		BraA03g050870.3C	A03:26178671-26181777	2.32839	Up
BraA08g015490.3C	A08:12769399-12770774	-1.27591	Down		BraA03g051330.3C	A03:26455613-26458319	3.20823	Up
BraA08g015510.3C	A08:12787984-12790066	-2.31742	Down		BraA03g051380.3C	A03:26487105-26487669	2.79131	Up
BraA08g015730.3C	A08:12915516-12915840	No expression in ionculated samples	Down		BraA03g051490.3C	A03:26569715-26572523	2.54841	Up
BraA08g015770.3C	A08:12943884-12945960	-2.46803	Down		BraA03g051690.3C	A03:26715484-26717365	2.71142	Up
BraA08g016250.3C	A08:13230050-13231166	-0.797702	Down		BraA03g051830.3C	A03:26797917-26800806	2.36838	Up
BraA08g016400.3C	A08:13362339-13368033	-1.11817	Down		BraA03g052050.3C	A03:26893263-26894866	2.32373	Up
BraA08g016620.3C	A08:13483051-13484589	-1.48112	Down		BraA03g052420.3C	A03:27086471-27088883	3.45003	Up
BraA08g016760.3C	A08:13563330-13566041	-1.30604	Down		BraA03g052730.3C	A03:27298183-27301843	2.08923	Up
BraA08g016900.3C	A08:13701212-13705402	-0.970038	Down		BraA03g052940.3C	A03:27430790-27433008	3.16136	Up
BraA08g017360.3C	A08:14029750-14031498	-1.82288	Down		BraA03g053120.3C	A03:27527883-27530075	2.42692	Up
BraA08g017590.3C	A08:14149815-14151114	-1.35685	Down		BraA03g053510.3C	A03:27699625-27700626	2.3088	Up
BraA08g018160.3C	A08:14460536-14461814	-1.17747	Down		BraA03g053700.3C	A03:27798287-27799754	7.35398	Up
BraA08g018920.3C	A08:14864076-14866292	-1.09851	Down		BraA03g055080.3C	A03:28707993-28710147	3.22237	Up
BraA08g019230.3C	A08:15003040-15004911	-1.28839	Down		BraA03g055390.3C	A03:28906047-28906320	2.09829	Up
BraA08g019250.3C	A08:15042088-15044183	-2.23552	Down		BraA03g055400.3C	A03:28910375-28914500	2.07363	Up
BraA08g019660.3C	A08:15223700-15225939	-0.986886	Down		BraA03g055650.3C	A03:29083165-29084279	2.13096	Up
BraA08g019700.3C	A08:15239292-15241005	-2.51528	Down		BraA03g056720.3C	A03:29782380-29783007	2.16477	Up
BraA08g019950.3C	A08:15339586-15340147	-1.23367	Down		BraA03g057010.3C	A03:29918227-29921524	2.2592	Up
BraA08g020290.3C	A08:15529854-15533248	-1.20977	Down		BraA03g057270.3C	A03:30072177-30074028	2.42233	Up
BraA08g020350.3C	A08:15618430-15619063	-1.5339	Down		BraA03g058370.3C	A03:30746710-30749042	2.44702	Up
BraA08g021000.3C	A08:15969242-15976221	-1.05805	Down		BraA03g058990.3C	A03:31277695-31279762	2.24221	Up
BraA08g021010.3C	A08:15978145-15983046	-1.001	Down		BraA03g059560.3C	A03:31615390-31617657	2.64024	Up
BraA08g021050.3C	A08:15994115-15996502	-1.86302	Down		BraA03g059840.3C	A03:31805506-31805992	5.83904	Up
BraA08g021110.3C	A08:16016636-16019082	-1.36314	Down		BraA03g063270.3C	A03:35811209-35814954	2.58052	Up
BraA08g021290.3C	A08:16136449-16140977	-1.70442	Down		BraA03g065120.3C	A03:37540550-37543531	2.68416	Up
BraA08g021310.3C	A08:16157607-16158618	-2.23756	Down		BraA04g000230.3C	A04:142896-144241	2.20386	Up
BraA08g021360.3C	A08:16173457-16176048	-1.00118	Down		BraA04g000450.3C	A04:352028-352337	2.82343	Up
BraA08g021400.3C	A08:16193098-16196495	-1.1227	Down		BraA04g000700.3C	A04:436328-437211	7.17136	Up
BraA08g021530.3C	A08:16296504-16297859	-1.25986	Down		BraA04g000890.3C	A04:535908-536184	No expression in control samples	Up
BraA08g022710.3C	A08:16965594-16966389	-1.90864	Down		BraA04g002530.3C	A04:1530303-1532663	2.45199	Up
BraA08g022740.3C	A08:16973416-16974119	-0.996849	Down		BraA04g002640.3C	A04:1610422-1611153	3.22258	Up
BraA08g022870.3C	A08:17022299-17024110	-1.58697	Down		BraA04g003260.3C	A04:2010673-2016853	3.68277	Up
BraA08g023100.3C	A08:17129101-17130687	-1.18265	Down		BraA04g003370.3C	A04:2092595-2093717	5.75142	Up
BraA08g023240.3C	A08:17174132-17179641	-0.745623	Down		BraA04g003380.3C	A04:2108149-2109289	6.53495	Up
BraA08g023280.3C	A08:17194658-17197461	-0.967435	Down		BraA04g003560.3C	A04:2221440-2223075	2.79196	Up
BraA08g023330.3C	A08:17223191-17226652	-1.06274	Down		BraA04g003800.3C	A04:2350798-2351263	5.79524	Up
BraA08g023350.3C	A08:17257970-17260524	-1.49345	Down		BraA04g004140.3C	A04:2551871-2552921	4.07366	Up
BraA08g023420.3C	A08:17314825-17315125	No expression in ionculated samples	Down		BraA04g004600.3C	A04:2941499-2943574	2.04425	Up
BraA08g023640.3C	A08:17420490-17421198	-1.04286	Down		BraA04g005440.3C	A04:3583496-3586450	2.79887	Up
BraA08g023800.3C	A08:17503985-17507654	-1.78119	Down		BraA04g005710.3C	A04:3767743-3769225	No expression in control samples	Up
BraA08g024010.3C	A08:17616324-17618304	-2.39737	Down		BraA04g006230.3C	A04:4168294-4168795	2.51009	Up
BraA08g024340.3C	A08:17776389-17778941	-1.36251	Down		BraA04g007240.3C	A04:4945720-4946047	3.67878	Up
BraA08g024440.3C	A08:17837758-17840223	-2.97073	Down		BraA04g007690.3C	A04:5334262-5335344	2.14115	Up
BraA08g024630.3C	A08:17940730-17942564	-1.63943	Down		BraA04g008600.3C	A04:6063543-6065953	3.142	Up
BraA08g024650.3C	A08:17949540-17952860	-1.33756	Down		BraA04g009110.3C	A04:6554191-6555211	2.05022	Up
BraA08g024810.3C	A08:18043590-18045416	-1.30899	Down		BraA04g010040.3C	A04:7975472-7978751	3.66351	Up
BraA08g025040.3C	A08:18140004-18142742	-1.12838	Down		BraA04g010460.3C	A04:8265795-8268190	3.11064	Up
BraA08g025540.3C	A08:18395016-18396764	-1.99712	Down		BraA04g011410.3C	A04:9050141-9052799	3.3305	Up
BraA08g025670.3C	A08:18494370-18494784	-1.96349	Down		BraA04g012570.3C	A04:9888524-9890037	3.0836	Up
BraA08g025770.3C	A08:18552795-18556470	-1.08848	Down		BraA04g012590.3C	A04:9893198-9894691	2.97151	Up
BraA08g025870.3C	A08:18588105-18591605	-0.982353	Down		BraA04g012870.3C	A04:10086725-10088292	2.34484	Up
BraA08g025890.3C	A08:18605226-18606093	-2.25502	Down		BraA04g013350.3C	A04:10445613-10447133	2.3725	Up
BraA08g026350.3C	A08:18813667-18815661	-0.859241	Down		BraA04g015850.3C	A04:12081647-12081800	No expression in control samples	Up
BraA08g026430.3C	A08:18871880-18874562	-2.76683	Down		BraA04g016310.3C	A04:12376806-12379017	2.56705	Up
BraA08g027350.3C	A08:19340987-19342278	-1.18177	Down		BraA04g016410.3C	A04:12458450-12459339	2.33116	Up
BraA08g027500.3C	A08:19406214-19409379	-0.989293	Down		BraA04g016850.3C	A04:12844580-12845656	2.13611	Up
BraA08g027760.3C	A08:19536920-19538864	-1.63025	Down		BraA04g017330.3C	A04:13201958-13204843	No expression in control samples	Up
BraA08g027950.3C	A08:19602123-19603230	-1.26829	Down		BraA04g017420.3C	A04:13282816-13284322	3.32226	Up
BraA08g028100.3C	A08:19694714-19697579	-1.02619	Down		BraA04g017530.3C	A04:13407601-13409579	2.23006	Up
BraA08g028120.3C	A08:19705468-19707885	-1.45926	Down		BraA04g017640.3C	A04:13477347-13478886	2.41042	Up
BraA08g028360.3C	A08:19821972-19823302	-0.954902	Down		BraA04g017740.3C	A04:13531007-13533398	2.11835	Up
BraA08g028390.3C	A08:19836771-19837874	-1.24991	Down		BraA04g017900.3C	A04:13648551-13649873	2.15146	Up
BraA08g028550.3C	A08:19896299-19897385	-1.14387	Down		BraA04g019890.3C	A04:14986829-14987651	2.06718	Up
BraA08g028640.3C	A08:19951438-19952312	-1.86923	Down		BraA04g019970.3C	A04:15025931-15027287	3.65565	Up
BraA08g029080.3C	A08:20112526-20116445	-1.26427	Down		BraA04g020060.3C	A04:15089608-15091996	3.04635	Up
BraA08g029150.3C	A08:20149355-20150498	-1.27125	Down		BraA04g020920.3C	A04:15752899-15754086	4.26154	Up
BraA08g029170.3C	A08:20160098-20160884	-1.27737	Down		BraA04g021020.3C	A04:15820543-15822074	3.44486	Up
BraA08g029490.3C	A08:20288575-20289972	-0.989861	Down		BraA04g021030.3C	A04:15823774-15826476	2.66119	Up
BraA08g030170.3C	A08:20550896-20553513	-0.820049	Down		BraA04g021220.3C	A04:15902717-15903836	2.61942	Up
BraA08g030710.3C	A08:20770472-20772294	-0.821782	Down		BraA04g021240.3C	A04:15906846-15909221	3.47027	Up
BraA08g030770.3C	A08:20793247-20795106	-1.16129	Down		BraA04g021840.3C	A04:16296862-16297595	2.13494	Up
BraA08g030930.3C	A08:20839578-20841015	-0.886057	Down		BraA04g021890.3C	A04:16312583-16316365	6.19451	Up
BraA08g031010.3C	A08:20883261-20885457	-1.9162	Down		BraA04g022100.3C	A04:16444705-16445563	3.22251	Up
BraA08g031170.3C	A08:20948742-20950141	-1.7331	Down		BraA04g022230.3C	A04:16509650-16511721	2.13199	Up
BraA08g031380.3C	A08:21054110-21055943	-1.1881	Down		BraA04g022300.3C	A04:16537063-16541586	2.7339	Up
BraA08g031470.3C	A08:21090072-21090768	-1.35549	Down		BraA04g022650.3C	A04:16772325-16773855	2.37024	Up
BraA08g031860.3C	A08:21288932-21292092	-0.995023	Down		BraA04g023430.3C	A04:17255905-17258188	3.06455	Up
BraA08g031960.3C	A08:21357678-21358861	-1.8162	Down		BraA04g023800.3C	A04:17462738-17463358	1.98499	Up
BraA08g032010.3C	A08:21386649-21388501	-2.86671	Down		BraA04g024010.3C	A04:17558827-17560328	3.10193	Up
BraA08g032060.3C	A08:21415889-21416970	-2.13857	Down		BraA04g024630.3C	A04:17850379-17851183	4.13018	Up
BraA08g032140.3C	A08:21452340-21456930	-1.40306	Down		BraA04g024860.3C	A04:17969156-17970300	3.57123	Up
BraA08g032360.3C	A08:21557243-21562596	-2.66457	Down		BraA04g024910.3C	A04:17995226-17996939	2.30208	Up
BraA08g032640.3C	A08:21650587-21653185	-4.48985	Down		BraA04g025030.3C	A04:18054231-18055300	2.99238	Up
BraA08g032720.3C	A08:21679995-21680505	-2.5427	Down		BraA04g025100.3C	A04:18092109-18093321	2.14372	Up
BraA08g032940.3C	A08:21765169-21768020	-1.15494	Down		BraA04g025400.3C	A04:18215946-18218086	2.10395	Up
BraA08g032960.3C	A08:21781891-21782405	-1.65888	Down		BraA04g026350.3C	A04:18775838-18777946	3.08976	Up
BraA08g033060.3C	A08:21829983-21831132	-2.32668	Down		BraA04g026370.3C	A04:18780977-18784580	2.12997	Up
BraA08g033120.3C	A08:21858825-21860545	-1.48891	Down		BraA04g026500.3C	A04:18840577-18842669	2.83618	Up
BraA08g033130.3C	A08:21861714-21862641	-2.66809	Down		BraA04g026590.3C	A04:18891208-18891919	2.29678	Up
BraA08g033520.3C	A08:22030839-22036936	-2.57693	Down		BraA04g027150.3C	A04:19182232-19183223	3.45284	Up
BraA08g033610.3C	A08:22063133-22064377	-1.02601	Down		BraA04g027160.3C	A04:19189804-19190419	2.8391	Up
BraA08g033750.3C	A08:22104866-22110161	-1.17376	Down		BraA04g027350.3C	A04:19297063-19298593	2.33154	Up
BraA08g033920.3C	A08:22186364-22188781	-0.816225	Down		BraA04g027390.3C	A04:19311170-19313593	2.59728	Up
BraA08g034670.3C	A08:22444712-22445842	-1.13832	Down		BraA04g027980.3C	A04:19639901-19641523	3.82557	Up
BraA08g035440.3C	A08:22751751-22753119	-2.04225	Down		BraA04g028080.3C	A04:19712901-19714314	3.00402	Up
BraA08g035730.3C	A08:22866178-22867243	-1.07297	Down		BraA04g028450.3C	A04:19910518-19911136	2.17179	Up
BraA08g035740.3C	A08:22872049-22874765	-2.64394	Down		BraA04g028660.3C	A04:20013385-20015051	3.34649	Up
BraA09g000010.3C	A09:4195-5870	-1.75758	Down		BraA04g028840.3C	A04:20083311-20084832	5.29287	Up
BraA09g000140.3C	A09:49722-52011	-0.987205	Down		BraA04g029510.3C	A04:20424376-20426194	4.48865	Up
BraA09g000150.3C	A09:55129-57041	-0.94617	Down		BraA04g029670.3C	A04:20503435-20503870	2.91431	Up
BraA09g000160.3C	A09:58011-60083	-1.03403	Down		BraA04g030180.3C	A04:20713400-20715646	2.06241	Up
BraA09g000310.3C	A09:128256-129997	-0.949142	Down		BraA04g030230.3C	A04:20738050-20738394	3.29131	Up
BraA09g000420.3C	A09:206954-211161	-1.51248	Down		BraA04g030600.3C	A04:20925733-20926399	No expression in control samples	Up
BraA09g000430.3C	A09:212857-215609	-0.878574	Down		BraA04g030620.3C	A04:20932604-20933697	No expression in control samples	Up
BraA09g000630.3C	A09:320835-322691	-1.16314	Down		BraA04g030990.3C	A04:21181624-21182005	2.11378	Up
BraA09g000900.3C	A09:539755-542317	-1.39189	Down		BraA04g031000.3C	A04:21190748-21191624	2.76054	Up
BraA09g000910.3C	A09:545627-546470	-1.87037	Down		BraA04g031600.3C	A04:21408411-21418295	2.32742	Up
BraA09g000950.3C	A09:570480-570888	-0.858792	Down		BraA04g031800.3C	A04:21491711-21493391	2.4864	Up
BraA09g001170.3C	A09:756880-758719	-1.30711	Down		BraA04g032000.3C	A04:21583071-21583660	2.02581	Up
BraA09g001240.3C	A09:784755-786981	-1.48097	Down		BraA04g032130.3C	A04:21625485-21626508	2.2855	Up
BraA09g001320.3C	A09:824883-826077	-1.49879	Down		BraA05g000040.3C	A05:10135-11660	2.02089	Up
BraA09g001390.3C	A09:842994-847346	-1.13465	Down		BraA05g000610.3C	A05:359927-363784	2.24296	Up
BraA09g001600.3C	A09:962216-965050	-1.15648	Down		BraA05g000730.3C	A05:410252-411236	2.88723	Up
BraA09g001720.3C	A09:1006608-1017546	-1.12617	Down		BraA05g001180.3C	A05:748343-748914	2.33718	Up
BraA09g002380.3C	A09:1490953-1494070	-0.870331	Down		BraA05g001270.3C	A05:800066-801236	3.85578	Up
BraA09g002530.3C	A09:1600526-1603208	-0.948821	Down		BraA05g001360.3C	A05:841742-844717	2.49163	Up
BraA09g002550.3C	A09:1618064-1619529	-1.24353	Down		BraA05g001900.3C	A05:1102757-1107459	3.30027	Up
BraA09g002650.3C	A09:1670702-1676327	-0.896797	Down		BraA05g002810.3C	A05:1526423-1526919	3.25061	Up
BraA09g003180.3C	A09:2000348-2003360	-1.09365	Down		BraA05g003390.3C	A05:1796413-1797190	3.32108	Up
BraA09g003360.3C	A09:2096381-2099508	-1.55991	Down		BraA05g003430.3C	A05:1819623-1823265	2.82655	Up
BraA09g003790.3C	A09:2383738-2384698	-1.84129	Down		BraA05g004390.3C	A05:2261684-2270997	2.7287	Up
BraA09g003880.3C	A09:2404694-2410394	-1.27381	Down		BraA05g004510.3C	A05:2319239-2321318	2.12335	Up
BraA09g004000.3C	A09:2500906-2506624	-0.986235	Down		BraA05g006280.3C	A05:3183793-3185423	4.09081	Up
BraA09g004160.3C	A09:2559698-2561715	-0.827306	Down		BraA05g006360.3C	A05:3216095-3216386	No expression in control samples	Up
BraA09g004550.3C	A09:2764042-2764525	-2.95605	Down		BraA05g006400.3C	A05:3241695-3243928	2.19186	Up
BraA09g004810.3C	A09:2907883-2909749	-1.22511	Down		BraA05g006990.3C	A05:3557636-3560035	2.5208	Up
BraA09g004930.3C	A09:2949517-2952649	-0.915621	Down		BraA05g007840.3C	A05:4004108-4006130	3.89842	Up
BraA09g005280.3C	A09:3120932-3122789	-1.09411	Down		BraA05g007850.3C	A05:4011298-4015826	No expression in control samples	Up
BraA09g006040.3C	A09:3527378-3530390	-1.47708	Down		BraA05g008240.3C	A05:4234665-4236062	5.37762	Up
BraA09g006070.3C	A09:3547081-3549622	-1.57094	Down		BraA05g008410.3C	A05:4339303-4341002	No expression in control samples	Up
BraA09g006230.3C	A09:3631643-3635475	-1.0584	Down		BraA05g009230.3C	A05:4902600-4903542	2.06631	Up
BraA09g006240.3C	A09:3640010-3642448	-0.876686	Down		BraA05g009240.3C	A05:4905283-4906216	2.09889	Up
BraA09g006310.3C	A09:3672901-3674942	-1.60145	Down		BraA05g009850.3C	A05:5253112-5253858	3.42294	Up
BraA09g006460.3C	A09:3721223-3722493	-2.74013	Down		BraA05g009950.3C	A05:5307943-5308945	2.56196	Up
BraA09g007290.3C	A09:4191339-4192691	-1.40542	Down		BraA05g010200.3C	A05:5434234-5435546	2.19877	Up
BraA09g007730.3C	A09:4464761-4466507	-0.893366	Down		BraA05g010460.3C	A05:5622812-5624977	2.31764	Up
BraA09g007810.3C	A09:4495200-4498049	-0.916345	Down		BraA05g010470.3C	A05:5625385-5630393	2.16295	Up
BraA09g008210.3C	A09:4692331-4695220	-0.878775	Down		BraA05g010690.3C	A05:5718803-5719604	7.68022	Up
BraA09g008340.3C	A09:4762097-4762628	-2.40847	Down		BraA05g010700.3C	A05:5720220-5721021	3.80428	Up
BraA09g008410.3C	A09:4806364-4811521	-0.860207	Down		BraA05g011400.3C	A05:6104496-6106240	2.88755	Up
BraA09g008460.3C	A09:4835117-4836345	-0.85314	Down		BraA05g012270.3C	A05:6656597-6657311	3.97554	Up
BraA09g008620.3C	A09:4909896-4913358	-1.72556	Down		BraA05g014510.3C	A05:8248812-8252856	2.11319	Up
BraA09g009090.3C	A09:5219461-5220874	-0.80279	Down		BraA05g014680.3C	A05:8322890-8323370	No expression in control samples	Up
BraA09g009290.3C	A09:5300816-5303043	-1.63807	Down		BraA05g014700.3C	A05:8333254-8334057	2.63504	Up
BraA09g009580.3C	A09:5447588-5449361	-2.35628	Down		BraA05g015110.3C	A05:8675608-8677725	2.6721	Up
BraA09g009870.3C	A09:5589169-5589988	-1.57897	Down		BraA05g015170.3C	A05:8752955-8754797	2.7454	Up
BraA09g010000.3C	A09:5678243-5679942	-1.45294	Down		BraA05g015290.3C	A05:8888045-8889557	3.38831	Up
BraA09g010210.3C	A09:5881954-5883902	-0.996412	Down		BraA05g016180.3C	A05:9585285-9588065	2.322	Up
BraA09g010400.3C	A09:5994365-5995360	-1.5378	Down		BraA05g016210.3C	A05:9595792-9597033	3.85889	Up
BraA09g010440.3C	A09:6037175-6038546	-1.80621	Down		BraA05g017380.3C	A05:10455266-10456482	No expression in control samples	Up
BraA09g010460.3C	A09:6044379-6046869	-1.21826	Down		BraA05g018210.3C	A05:11189882-11190592	2.28166	Up
BraA09g011200.3C	A09:6489845-6490421	-1.18218	Down		BraA05g020000.3C	A05:12940943-12943538	4.79595	Up
BraA09g011220.3C	A09:6496821-6499386	-1.29719	Down		BraA05g021680.3C	A05:15417128-15419950	2.46206	Up
BraA09g011660.3C	A09:6829250-6829760	-2.08394	Down		BraA05g023200.3C	A05:17088574-17091980	2.46031	Up
BraA09g011730.3C	A09:6880468-6882928	-1.48227	Down		BraA05g024500.3C	A05:18409314-18411855	3.91417	Up
BraA09g012050.3C	A09:7084511-7087417	-1.16975	Down		BraA05g024940.3C	A05:18733181-18735514	4.64556	Up
BraA09g012900.3C	A09:7591567-7592633	-1.57279	Down		BraA05g024950.3C	A05:18736466-18737247	2.18321	Up
BraA09g012920.3C	A09:7616467-7617741	-0.895563	Down		BraA05g025030.3C	A05:18787471-18787879	3.0496	Up
BraA09g013210.3C	A09:7775328-7777650	-1.30734	Down		BraA05g025150.3C	A05:18909097-18910228	2.96543	Up
BraA09g013280.3C	A09:7821181-7824280	-3.11595	Down		BraA05g025530.3C	A05:19225997-19228624	2.36297	Up
BraA09g013410.3C	A09:7876244-7877250	-0.833887	Down		BraA05g025730.3C	A05:19406930-19409470	2.27211	Up
BraA09g013680.3C	A09:7991549-7992409	-2.65035	Down		BraA05g026750.3C	A05:20143197-20143773	2.4374	Up
BraA09g013910.3C	A09:8125879-8127444	No expression in ionculated samples	Down		BraA05g026800.3C	A05:20176724-20182121	2.77914	Up
BraA09g013990.3C	A09:8200299-8202444	-2.69825	Down		BraA05g027510.3C	A05:20610435-20611501	2.72842	Up
BraA09g014110.3C	A09:8242443-8243080	-1.80757	Down		BraA05g027600.3C	A05:20656874-20659355	3.68549	Up
BraA09g014250.3C	A09:8348413-8354817	-0.927097	Down		BraA05g028540.3C	A05:21276899-21277541	2.75945	Up
BraA09g014270.3C	A09:8356571-8357654	-1.25027	Down		BraA05g028570.3C	A05:21289844-21290273	2.0488	Up
BraA09g014350.3C	A09:8389148-8390830	-1.27766	Down		BraA05g028670.3C	A05:21342296-21344162	2.14257	Up
BraA09g014500.3C	A09:8480179-8481802	-2.44865	Down		BraA05g028880.3C	A05:21449298-21450863	2.26214	Up
BraA09g014720.3C	A09:8610530-8615796	-1.28243	Down		BraA05g029460.3C	A05:21746327-21748221	5.68241	Up
BraA09g014730.3C	A09:8616655-8619328	-1.61313	Down		BraA05g029580.3C	A05:21875128-21876832	3.80323	Up
BraA09g014740.3C	A09:8626591-8632075	-1.11719	Down		BraA05g029960.3C	A05:22054839-22056027	3.31854	Up
BraA09g014800.3C	A09:8670550-8672824	-1.6677	Down		BraA05g030460.3C	A05:22387296-22390835	2.54017	Up
BraA09g015180.3C	A09:8943876-8946184	-1.05484	Down		BraA05g031410.3C	A05:22989252-22991752	2.26166	Up
BraA09g015390.3C	A09:9112295-9113324	-1.40072	Down		BraA05g031670.3C	A05:23136190-23137050	2.93796	Up
BraA09g015420.3C	A09:9146706-9149511	-1.66706	Down		BraA05g032070.3C	A05:23332656-23334446	2.94705	Up
BraA09g015470.3C	A09:9205971-9207852	-1.30765	Down		BraA05g032160.3C	A05:23389557-23391369	2.76468	Up
BraA09g015560.3C	A09:9269892-9270483	No expression in ionculated samples	Down		BraA05g032310.3C	A05:23452065-23452452	3.60735	Up
BraA09g015670.3C	A09:9386971-9388543	-1.48764	Down		BraA05g032420.3C	A05:23519337-23521204	4.09498	Up
BraA09g015850.3C	A09:9533161-9535555	-3.1242	Down		BraA05g034120.3C	A05:24406680-24408632	No expression in control samples	Up
BraA09g016170.3C	A09:9881803-9884241	-1.07833	Down		BraA05g034150.3C	A05:24418926-24420134	3.27506	Up
BraA09g016400.3C	A09:10078146-10079862	-0.755088	Down		BraA05g034610.3C	A05:24616481-24618124	2.14339	Up
BraA09g017070.3C	A09:10524506-10527031	-1.61975	Down		BraA05g035810.3C	A05:25139805-25140884	3.11643	Up
BraA09g017130.3C	A09:10563003-10565398	-1.05027	Down		BraA05g037380.3C	A05:25787932-25788721	2.55203	Up
BraA09g017520.3C	A09:10865549-10870845	-0.90053	Down		BraA05g037550.3C	A05:25864764-25866082	2.85694	Up
BraA09g017690.3C	A09:11045565-11047786	-1.22811	Down		BraA05g037780.3C	A05:25946220-25948133	2.36863	Up
BraA09g018050.3C	A09:11404023-11406081	-1.23655	Down		BraA05g038340.3C	A05:26227569-26229136	2.32265	Up
BraA09g018260.3C	A09:11558247-11559333	-0.835428	Down		BraA05g038350.3C	A05:26230916-26232466	2.4479	Up
BraA09g019450.3C	A09:12499426-12501455	-1.45745	Down		BraA05g038630.3C	A05:26379886-26382803	2.73412	Up
BraA09g019990.3C	A09:12944188-12945785	-1.9643	Down		BraA05g038730.3C	A05:26424797-26426177	2.36072	Up
BraA09g020290.3C	A09:13142401-13144069	-1.46667	Down		BraA05g038740.3C	A05:26426312-26426852	2.68617	Up
BraA09g020300.3C	A09:13149864-13150614	-0.772791	Down		BraA05g039270.3C	A05:26831157-26831692	4.35406	Up
BraA09g020340.3C	A09:13175820-13183875	-2.09057	Down		BraA05g039280.3C	A05:26835434-26836651	2.14745	Up
BraA09g020780.3C	A09:13469939-13478418	-0.772508	Down		BraA05g040340.3C	A05:27378088-27378919	2.26732	Up
BraA09g021230.3C	A09:13813031-13814798	-1.30607	Down		BraA05g040650.3C	A05:27534447-27535033	2.24703	Up
BraA09g021370.3C	A09:13900254-13901463	-2.17194	Down		BraA05g040740.3C	A05:27572630-27573707	7.44574	Up
BraA09g021750.3C	A09:14208439-14210954	-1.15253	Down		BraA05g040970.3C	A05:27657964-27658887	2.10044	Up
BraA09g022320.3C	A09:14671277-14671925	-0.888542	Down		BraA05g041080.3C	A05:27724944-27725280	No expression in control samples	Up
BraA09g022470.3C	A09:14852246-14859450	-1.3529	Down		BraA05g041300.3C	A05:27819912-27821953	3.29391	Up
BraA09g022850.3C	A09:15111037-15112561	-1.19881	Down		BraA05g041310.3C	A05:27822228-27823056	2.8328	Up
BraA09g022910.3C	A09:15127800-15130004	-2.20784	Down		BraA05g041390.3C	A05:27863006-27863858	2.08835	Up
BraA09g022980.3C	A09:15179630-15181651	-1.55629	Down		BraA05g042130.3C	A05:28227918-28229280	2.72103	Up
BraA09g023210.3C	A09:15362333-15364073	-0.803124	Down		BraA05g042350.3C	A05:28317217-28318830	2.72463	Up
BraA09g023240.3C	A09:15393899-15397318	-1.55902	Down		BraA05g042370.3C	A05:28346937-28349230	4.20507	Up
BraA09g023410.3C	A09:15670326-15673990	-0.948321	Down		BraA06g000130.3C	A06:118904-120873	2.68568	Up
BraA09g023520.3C	A09:15747566-15749544	-1.34326	Down		BraA06g000600.3C	A06:416482-417365	2.13451	Up
BraA09g024150.3C	A09:16168826-16169798	-1.88433	Down		BraA06g002140.3C	A06:1280828-1281881	No expression in control samples	Up
BraA09g024670.3C	A09:16556841-16558087	-1.27172	Down		BraA06g002360.3C	A06:1453222-1457296	3.79554	Up
BraA09g024880.3C	A09:16712615-16714288	-1.27537	Down		BraA06g002830.3C	A06:1682694-1683330	2.26284	Up
BraA09g025190.3C	A09:16924020-16924696	-2.65552	Down		BraA06g003590.3C	A06:2162269-2162831	2.91348	Up
BraA09g025530.3C	A09:17183605-17187744	-0.780508	Down		BraA06g004180.3C	A06:2499208-2501975	3.58491	Up
BraA09g025570.3C	A09:17210100-17211838	-2.2735	Down		BraA06g004450.3C	A06:2640667-2643599	2.76983	Up
BraA09g025690.3C	A09:17272979-17274619	-1.97512	Down		BraA06g004460.3C	A06:2644487-2647013	2.60677	Up
BraA09g026600.3C	A09:17999610-18001419	-1.97978	Down		BraA06g005140.3C	A06:3055992-3057823	2.51482	Up
BraA09g026760.3C	A09:18146583-18151633	-1.34677	Down		BraA06g005310.3C	A06:3158137-3160363	3.17285	Up
BraA09g027360.3C	A09:18686737-18690010	-1.46545	Down		BraA06g005460.3C	A06:3227637-3228114	2.44326	Up
BraA09g028180.3C	A09:19257193-19260314	-1.53141	Down		BraA06g006140.3C	A06:3546777-3547749	2.53609	Up
BraA09g029190.3C	A09:20759235-20762011	-0.976729	Down		BraA06g006200.3C	A06:3569832-3570387	2.56477	Up
BraA09g029230.3C	A09:20830392-20831546	No expression in ionculated samples	Down		BraA06g006680.3C	A06:3760567-3765022	5.11612	Up
BraA09g029360.3C	A09:21033362-21037181	-1.5492	Down		BraA06g007400.3C	A06:4108377-4109621	3.08913	Up
BraA09g029750.3C	A09:21413188-21413986	-1.15951	Down		BraA06g007570.3C	A06:4188811-4189628	3.08632	Up
BraA09g030810.3C	A09:23733566-23735827	-1.17248	Down		BraA06g008280.3C	A06:4513341-4513959	2.14978	Up
BraA09g031040.3C	A09:23976019-23981779	-0.99505	Down		BraA06g010100.3C	A06:5465895-5467226	2.92111	Up
BraA09g031310.3C	A09:24225900-24227461	-1.11944	Down		BraA06g010180.3C	A06:5530946-5531588	3.21342	Up
BraA09g031880.3C	A09:24778535-24780323	-0.972301	Down		BraA06g010190.3C	A06:5535585-5538225	4.88758	Up
BraA09g031890.3C	A09:24794053-24796352	-0.75806	Down		BraA06g010320.3C	A06:5618129-5618729	4.20453	Up
BraA09g032330.3C	A09:25119296-25123402	-1.09852	Down		BraA06g011480.3C	A06:6176804-6177850	2.71769	Up
BraA09g032350.3C	A09:25133657-25135462	-0.983626	Down		BraA06g011700.3C	A06:6289722-6292292	2.71534	Up
BraA09g032690.3C	A09:25398461-25402221	-3.15272	Down		BraA06g011900.3C	A06:6431136-6432017	2.66641	Up
BraA09g032740.3C	A09:25410978-25412431	-0.938914	Down		BraA06g012350.3C	A06:6585005-6587314	2.85949	Up
BraA09g032750.3C	A09:25414215-25416264	-1.11131	Down		BraA06g013980.3C	A06:7374656-7376037	4.17173	Up
BraA09g032920.3C	A09:25541898-25544342	-1.39136	Down		BraA06g014170.3C	A06:7476585-7477691	2.26671	Up
BraA09g033010.3C	A09:25665863-25668776	-0.978496	Down		BraA06g014220.3C	A06:7518389-7519403	3.07585	Up
BraA09g033430.3C	A09:26107259-26110891	-1.04758	Down		BraA06g014920.3C	A06:7953445-7954349	No expression in control samples	Up
BraA09g033730.3C	A09:26352848-26354186	-0.927427	Down		BraA06g015200.3C	A06:8130474-8133467	2.8648	Up
BraA09g033850.3C	A09:26463141-26464145	No expression in ionculated samples	Down		BraA06g015210.3C	A06:8134873-8136606	3.72108	Up
BraA09g033870.3C	A09:26491204-26494734	-1.15157	Down		BraA06g015930.3C	A06:8649496-8652813	2.14557	Up
BraA09g034000.3C	A09:26598477-26600979	-2.13866	Down		BraA06g016090.3C	A06:8749625-8752698	3.84396	Up
BraA09g034560.3C	A09:27178070-27182489	-0.895033	Down		BraA06g016670.3C	A06:9144787-9147046	2.98299	Up
BraA09g034730.3C	A09:27393811-27395717	-1.16684	Down		BraA06g016910.3C	A06:9329034-9330811	3.04207	Up
BraA09g034840.3C	A09:27527732-27528847	-1.11905	Down		BraA06g016980.3C	A06:9363061-9363564	2.80972	Up
BraA09g036060.3C	A09:28454711-28456217	-1.52508	Down		BraA06g017200.3C	A06:9480535-9482650	3.94685	Up
BraA09g036260.3C	A09:28653380-28660459	-0.854863	Down		BraA06g017890.3C	A06:9959450-9962078	2.33613	Up
BraA09g036400.3C	A09:28799849-28800743	-1.0842	Down		BraA06g017920.3C	A06:9970736-9973309	3.28879	Up
BraA09g036460.3C	A09:28854490-28857367	-1.37816	Down		BraA06g018040.3C	A06:10050701-10051563	2.00792	Up
BraA09g036730.3C	A09:29126078-29138093	-1.30762	Down		BraA06g019200.3C	A06:10905638-10907533	3.60289	Up
BraA09g036780.3C	A09:29159492-29164831	-1.24477	Down		BraA06g019940.3C	A06:11476368-11480716	4.51496	Up
BraA09g036790.3C	A09:29177814-29182578	-1.60962	Down		BraA06g021210.3C	A06:12442150-12444567	3.66309	Up
BraA09g036850.3C	A09:29218446-29220890	-0.93488	Down		BraA06g023820.3C	A06:16377993-16379218	2.88195	Up
BraA09g037460.3C	A09:29587607-29587844	-1.20905	Down		BraA06g025300.3C	A06:17641700-17644043	3.28184	Up
BraA09g037930.3C	A09:29948051-29950163	-0.755222	Down		BraA06g025820.3C	A06:18107810-18108708	2.40559	Up
BraA09g038000.3C	A09:29986485-29989675	-1.22593	Down		BraA06g026760.3C	A06:18768173-18769633	3.74755	Up
BraA09g038200.3C	A09:30167532-30170045	-1.69698	Down		BraA06g026850.3C	A06:18810304-18811861	2.12745	Up
BraA09g038250.3C	A09:30200657-30203508	-1.73961	Down		BraA06g027240.3C	A06:19099189-19105600	3.5039	Up
BraA09g038640.3C	A09:30424067-30425282	-2.25823	Down		BraA06g027520.3C	A06:19225416-19228132	2.18164	Up
BraA09g038670.3C	A09:30438557-30439759	-3.73633	Down		BraA06g028010.3C	A06:19471977-19473774	2.5136	Up
BraA09g038720.3C	A09:30456667-30459251	-1.35844	Down		BraA06g028120.3C	A06:19554648-19555853	2.32475	Up
BraA09g038830.3C	A09:30518289-30518814	-2.45815	Down		BraA06g028220.3C	A06:19617299-19617667	3.40507	Up
BraA09g038840.3C	A09:30528876-30530181	-1.58627	Down		BraA06g029100.3C	A06:20139847-20143781	2.35496	Up
BraA09g039110.3C	A09:30725082-30726594	-1.0019	Down		BraA06g029470.3C	A06:20398225-20399473	2.45182	Up
BraA09g039240.3C	A09:30803396-30805957	-1.08284	Down		BraA06g029520.3C	A06:20411722-20412868	2.27134	Up
BraA09g039650.3C	A09:31017003-31019326	-1.06837	Down		BraA06g030270.3C	A06:20956497-20957181	3.31966	Up
BraA09g040050.3C	A09:31318810-31319245	-2.06451	Down		BraA06g030460.3C	A06:21105163-21105727	2.53413	Up
BraA09g040060.3C	A09:31321405-31323624	-2.0225	Down		BraA06g030600.3C	A06:21191362-21192410	2.20273	Up
BraA09g040210.3C	A09:31401527-31403554	-0.978888	Down		BraA06g031140.3C	A06:21439489-21440412	2.2929	Up
BraA09g040450.3C	A09:31549048-31552099	-0.95793	Down		BraA06g031190.3C	A06:21470849-21475556	3.94625	Up
BraA09g040510.3C	A09:31631581-31635129	-1.5638	Down		BraA06g031540.3C	A06:21729011-21732202	4.62991	Up
BraA09g041440.3C	A09:32289089-32291092	-1.96649	Down		BraA06g031550.3C	A06:21742065-21742506	3.45244	Up
BraA09g041480.3C	A09:32317618-32323180	-0.888653	Down		BraA06g031660.3C	A06:21807495-21808694	2.82322	Up
BraA09g041700.3C	A09:32495791-32498711	-1.64278	Down		BraA06g032440.3C	A06:22274094-22275675	2.59159	Up
BraA09g041740.3C	A09:32548735-32549390	-1.25097	Down		BraA06g033820.3C	A06:23084157-23084652	2.14961	Up
BraA09g042060.3C	A09:32789907-32790940	-1.40639	Down		BraA06g034390.3C	A06:23392449-23393769	2.66861	Up
BraA09g042380.3C	A09:32976411-32978700	-1.37245	Down		BraA06g036150.3C	A06:24307405-24309327	2.29968	Up
BraA09g042590.3C	A09:33063436-33064784	-0.950519	Down		BraA06g036970.3C	A06:24759981-24761559	3.63318	Up
BraA09g042710.3C	A09:33147081-33149159	-1.60853	Down		BraA06g037410.3C	A06:24987425-24988322	3.95438	Up
BraA09g042760.3C	A09:33183754-33187808	-0.765285	Down		BraA06g038510.3C	A06:25617996-25619952	2.9802	Up
BraA09g042800.3C	A09:33199599-33200331	-1.28985	Down		BraA06g038580.3C	A06:25647366-25648467	2.25087	Up
BraA09g042820.3C	A09:33205210-33207979	-1.85324	Down		BraA06g039340.3C	A06:26214538-26216471	3.96136	Up
BraA09g043810.3C	A09:33856341-33856758	-1.03453	Down		BraA06g039490.3C	A06:26292002-26292988	No expression in control samples	Up
BraA09g044050.3C	A09:34035001-34036139	-1.18332	Down		BraA06g039670.3C	A06:26381098-26382509	2.53485	Up
BraA09g044270.3C	A09:34135650-34138167	-2.42651	Down		BraA06g039700.3C	A06:26392010-26393895	3.31199	Up
BraA09g044380.3C	A09:34212157-34213742	-1.02871	Down		BraA06g040670.3C	A06:26999807-27000981	2.03748	Up
BraA09g044710.3C	A09:34346368-34348472	-1.96169	Down		BraA06g041100.3C	A06:27170791-27171190	No expression in control samples	Up
BraA09g045340.3C	A09:34659642-34662744	-1.00033	Down		BraA06g041260.3C	A06:27236249-27237694	2.43066	Up
BraA09g045600.3C	A09:34814888-34817297	-1.51106	Down		BraA06g043030.3C	A06:28156283-28157847	2.31547	Up
BraA09g045700.3C	A09:34887519-34893210	-2.2205	Down		BraA06g043060.3C	A06:28172066-28172615	No expression in control samples	Up
BraA09g045790.3C	A09:34941845-34945189	-1.96853	Down		BraA06g043480.3C	A06:28367736-28369786	2.06413	Up
BraA09g045860.3C	A09:34971785-34974922	-1.27099	Down		BraA06g043730.3C	A06:28528035-28528725	2.47484	Up
BraA09g046270.3C	A09:35194502-35196322	-0.903549	Down		BraA06g043990.3C	A06:28648594-28650672	2.33096	Up
BraA09g046410.3C	A09:35297357-35300299	-1.66987	Down		BraA06g044100.3C	A06:28710373-28710862	2.61719	Up
BraA09g046430.3C	A09:35303962-35308200	-0.960996	Down		BraA07g000330.3C	A07:172968-173610	No expression in control samples	Up
BraA09g046790.3C	A09:35548595-35550988	-0.795027	Down		BraA07g000480.3C	A07:224779-227832	3.93654	Up
BraA09g046920.3C	A09:35621633-35623684	-2.67622	Down		BraA07g000950.3C	A07:661929-663594	2.28972	Up
BraA09g047010.3C	A09:35694320-35695123	-1.91688	Down		BraA07g001030.3C	A07:739431-741768	No expression in control samples	Up
BraA09g047080.3C	A09:35714542-35717835	-0.8809	Down		BraA07g002120.3C	A07:1581215-1582295	2.23934	Up
BraA09g047250.3C	A09:35777902-35782936	-1.29676	Down		BraA07g003570.3C	A07:2705328-2705895	2.58935	Up
BraA09g047720.3C	A09:36044975-36046215	-1.05269	Down		BraA07g005550.3C	A07:4456996-4457734	2.13728	Up
BraA09g047750.3C	A09:36058582-36059770	-1.05031	Down		BraA07g006810.3C	A07:7049574-7052231	2.36182	Up
BraA09g048560.3C	A09:36481375-36483762	-1.41621	Down		BraA07g008590.3C	A07:8612040-8614425	2.12306	Up
BraA09g048780.3C	A09:36615344-36618535	-0.798853	Down		BraA07g008690.3C	A07:8697220-8699127	4.37875	Up
BraA09g048920.3C	A09:36673867-36675476	-1.33138	Down		BraA07g009090.3C	A07:9114081-9116436	2.31269	Up
BraA09g049020.3C	A09:36717425-36721416	-2.41203	Down		BraA07g009300.3C	A07:9236421-9236775	3.30948	Up
BraA09g049160.3C	A09:36795562-36801830	-1.47401	Down		BraA07g009690.3C	A07:9700061-9701303	2.62461	Up
BraA09g049290.3C	A09:36853573-36855163	-1.84912	Down		BraA07g009700.3C	A07:9701817-9702892	2.15384	Up
BraA09g049300.3C	A09:36855974-36859290	-1.28733	Down		BraA07g010120.3C	A07:9967010-9967767	2.39838	Up
BraA09g050830.3C	A09:37538565-37539639	-1.68596	Down		BraA07g014190.3C	A07:12990397-12990868	2.08718	Up
BraA09g050930.3C	A09:37576440-37578714	-1.43575	Down		BraA07g014220.3C	A07:12997563-12998004	2.66048	Up
BraA09g050970.3C	A09:37599534-37600918	-1.48503	Down		BraA07g014290.3C	A07:13032679-13033238	2.44922	Up
BraA09g051330.3C	A09:37789546-37790494	-1.9161	Down		BraA07g014460.3C	A07:13171745-13172402	2.63138	Up
BraA09g051630.3C	A09:37936053-37938105	-1.2237	Down		BraA07g014520.3C	A07:13205711-13207768	2.01293	Up
BraA09g052270.3C	A09:38188161-38190479	-0.96154	Down		BraA07g014710.3C	A07:13385900-13390074	3.85409	Up
BraA09g052400.3C	A09:38262873-38263612	-0.981267	Down		BraA07g015170.3C	A07:13697993-13698585	2.05639	Up
BraA09g052500.3C	A09:38331493-38332991	-0.823416	Down		BraA07g015670.3C	A07:13999808-14002370	2.1502	Up
BraA09g052750.3C	A09:38440280-38442135	-0.711868	Down		BraA07g015680.3C	A07:14002994-14006172	4.70383	Up
BraA09g052820.3C	A09:38455027-38457247	-0.964998	Down		BraA07g016510.3C	A07:14518410-14519012	3.49822	Up
BraA09g052960.3C	A09:38515673-38517053	-3.3689	Down		BraA07g017040.3C	A07:14829486-14833134	2.4576	Up
BraA09g053080.3C	A09:38567459-38570129	-1.48243	Down		BraA07g018260.3C	A07:15565697-15567707	3.40116	Up
BraA09g053610.3C	A09:38878732-38879851	-2.00856	Down		BraA07g018290.3C	A07:15594139-15594789	2.21361	Up
BraA09g054110.3C	A09:39166175-39170907	-1.03701	Down		BraA07g018460.3C	A07:15696994-15699184	2.13862	Up
BraA09g054250.3C	A09:39259709-39262667	-0.873011	Down		BraA07g019200.3C	A07:16309533-16310388	3.16038	Up
BraA09g055170.3C	A09:39846629-39851132	-0.838568	Down		BraA07g019460.3C	A07:16421872-16423873	4.25804	Up
BraA09g055610.3C	A09:40065914-40067034	-1.68449	Down		BraA07g021280.3C	A07:17462031-17463313	3.77103	Up
BraA09g055620.3C	A09:40071314-40075371	-0.838124	Down		BraA07g021690.3C	A07:17664631-17666750	4.52117	Up
BraA09g055720.3C	A09:40129532-40129847	-1.2789	Down		BraA07g021800.3C	A07:17710096-17713036	2.1637	Up
BraA09g055790.3C	A09:40157263-40158922	-1.02391	Down		BraA07g021900.3C	A07:17768382-17769720	2.82376	Up
BraA09g056020.3C	A09:40252023-40253581	-0.756978	Down		BraA07g021980.3C	A07:17817410-17819106	2.18353	Up
BraA09g056390.3C	A09:40398997-40401840	-0.939476	Down		BraA07g022360.3C	A07:18030000-18032013	2.95554	Up
BraA09g056510.3C	A09:40445452-40447983	-1.7771	Down		BraA07g022390.3C	A07:18047594-18049126	4.78503	Up
BraA09g057160.3C	A09:40767668-40771009	-1.29571	Down		BraA07g022420.3C	A07:18071543-18073002	2.65697	Up
BraA09g058920.3C	A09:41655708-41657275	-2.00327	Down		BraA07g022750.3C	A07:18265583-18267227	3.055	Up
BraA09g058940.3C	A09:41671933-41673493	-1.35737	Down		BraA07g024200.3C	A07:19032348-19032952	2.33991	Up
BraA09g059090.3C	A09:41745556-41748879	-1.31314	Down		BraA07g024380.3C	A07:19129301-19130310	2.4307	Up
BraA09g059120.3C	A09:41758238-41761711	-3.50885	Down		BraA07g024590.3C	A07:19236860-19238677	No expression in control samples	Up
BraA09g059280.3C	A09:41844825-41847536	-1.81884	Down		BraA07g024600.3C	A07:19238695-19239918	No expression in control samples	Up
BraA09g059750.3C	A09:42004354-42009005	-1.7258	Down		BraA07g024690.3C	A07:19280450-19281800	3.6467	Up
BraA09g060000.3C	A09:42153061-42154171	-1.24137	Down		BraA07g024850.3C	A07:19358517-19362037	2.23675	Up
BraA09g060320.3C	A09:42310931-42313576	-1.64845	Down		BraA07g025120.3C	A07:19480622-19481012	3.39591	Up
BraA09g060380.3C	A09:42338569-42341937	-1.22841	Down		BraA07g025400.3C	A07:19611662-19615428	2.6608	Up
BraA09g060790.3C	A09:42527002-42531913	-1.31191	Down		BraA07g025410.3C	A07:19626903-19631987	6.59137	Up
BraA09g060800.3C	A09:42533583-42534135	No expression in ionculated samples	Down		BraA07g025740.3C	A07:19776753-19783193	3.86594	Up
BraA09g061450.3C	A09:42870536-42871877	-1.17477	Down		BraA07g026520.3C	A07:20171358-20172717	2.64361	Up
BraA09g061510.3C	A09:42901186-42903142	-1.78801	Down		BraA07g026610.3C	A07:20212103-20213299	2.05643	Up
BraA09g061680.3C	A09:42982265-42986433	-2.17639	Down		BraA07g026620.3C	A07:20216944-20217907	4.02553	Up
BraA09g061760.3C	A09:43025155-43027729	-3.01843	Down		BraA07g026640.3C	A07:20221496-20222838	2.59425	Up
BraA09g061930.3C	A09:43110664-43111652	-1.07047	Down		BraA07g027140.3C	A07:20541637-20542355	No expression in control samples	Up
BraA09g062130.3C	A09:43211105-43213197	-1.52078	Down		BraA07g027330.3C	A07:20645428-20646103	3.21214	Up
BraA09g062380.3C	A09:43307341-43309624	-0.990161	Down		BraA07g028020.3C	A07:21030595-21031321	2.27237	Up
BraA09g062410.3C	A09:43318284-43319676	-2.01641	Down		BraA07g028130.3C	A07:21069420-21072691	2.6768	Up
BraA09g062650.3C	A09:43421670-43426785	-0.929931	Down		BraA07g028490.3C	A07:21224051-21226886	2.43011	Up
BraA09g062720.3C	A09:43462813-43463858	-1.07412	Down		BraA07g028500.3C	A07:21229080-21229791	2.37432	Up
BraA09g063050.3C	A09:43626314-43627972	-2.06298	Down		BraA07g028670.3C	A07:21307770-21312459	4.11267	Up
BraA09g063880.3C	A09:43982723-43984122	-0.894726	Down		BraA07g028790.3C	A07:21368057-21368666	No expression in control samples	Up
BraA09g064270.3C	A09:44139833-44140352	-3.10464	Down		BraA07g028940.3C	A07:21419163-21420246	2.7801	Up
BraA09g064360.3C	A09:44173745-44175369	-1.81367	Down		BraA07g029080.3C	A07:21502489-21503113	2.77368	Up
BraA09g065000.3C	A09:44457556-44458290	-1.23575	Down		BraA07g029140.3C	A07:21545232-21545589	2.55073	Up
BraA09g065010.3C	A09:44458711-44463326	-1.10555	Down		BraA07g029890.3C	A07:21952705-21953146	2.44933	Up
BraA09g065400.3C	A09:44650240-44651903	-1.07924	Down		BraA07g030000.3C	A07:21985414-21987529	4.10675	Up
BraA09g065820.3C	A09:44838783-44840849	-1.19475	Down		BraA07g030010.3C	A07:21991534-21992537	4.18028	Up
BraA09g065910.3C	A09:44871347-44873663	-2.61444	Down		BraA07g030360.3C	A07:22213580-22214466	2.74705	Up
BraA09g065940.3C	A09:44885643-44886844	-1.19487	Down		BraA07g030670.3C	A07:22409233-22409791	2.41228	Up
BraA09g065990.3C	A09:44911840-44913403	-1.34905	Down		BraA07g030850.3C	A07:22531660-22534765	4.20219	Up
BraA09g066160.3C	A09:45003267-45005309	-1.14389	Down		BraA07g031070.3C	A07:22649927-22652190	2.25993	Up
BraA09g066210.3C	A09:45030872-45031937	-1.55624	Down		BraA07g031090.3C	A07:22668153-22669490	2.35818	Up
BraA09g066480.3C	A09:45147721-45152449	-2.09756	Down		BraA07g031460.3C	A07:22879842-22883390	3.39381	Up
BraA10g000220.3C	A10:96584-98030	-1.03721	Down		BraA07g031850.3C	A07:23079447-23090542	3.06073	Up
BraA10g000400.3C	A10:172240-173280	-2.09231	Down		BraA07g031860.3C	A07:23091285-23091993	4.9047	Up
BraA10g000430.3C	A10:201245-204751	-1.90479	Down		BraA07g032120.3C	A07:23225104-23225951	2.97613	Up
BraA10g000470.3C	A10:224559-226022	-1.73214	Down		BraA07g032730.3C	A07:23601646-23602814	2.01423	Up
BraA10g000550.3C	A10:267594-269046	-2.68135	Down		BraA07g033180.3C	A07:23780736-23781658	2.32747	Up
BraA10g000600.3C	A10:281721-282919	-1.22777	Down		BraA07g033700.3C	A07:24054752-24055348	2.71158	Up
BraA10g000820.3C	A10:418302-421107	-3.24063	Down		BraA07g034050.3C	A07:24259243-24261097	2.50725	Up
BraA10g000860.3C	A10:444136-445171	-2.54309	Down		BraA07g034400.3C	A07:24435174-24436627	2.33159	Up
BraA10g001020.3C	A10:537012-539715	-1.11417	Down		BraA07g034410.3C	A07:24444091-24445599	2.49325	Up
BraA10g001350.3C	A10:729988-733308	-1.31421	Down		BraA07g034700.3C	A07:24633823-24638461	2.76926	Up
BraA10g002170.3C	A10:1117552-1118908	-1.30329	Down		BraA07g034780.3C	A07:24688472-24688967	2.56314	Up
BraA10g002450.3C	A10:1261892-1262645	-0.795212	Down		BraA07g035080.3C	A07:24817798-24819883	No expression in control samples	Up
BraA10g002650.3C	A10:1346104-1351388	-1.87964	Down		BraA07g035100.3C	A07:24828650-24832928	2.01901	Up
BraA10g002770.3C	A10:1417038-1420184	-3.48249	Down		BraA07g035360.3C	A07:24991513-24991954	2.47481	Up
BraA10g002780.3C	A10:1435433-1436156	-1.61027	Down		BraA07g035510.3C	A07:25078297-25079187	3.50696	Up
BraA10g002860.3C	A10:1478579-1479730	-0.89021	Down		BraA07g035520.3C	A07:25080088-25082884	5.31547	Up
BraA10g003270.3C	A10:1701470-1702667	-1.16033	Down		BraA07g035720.3C	A07:25183024-25186722	2.64569	Up
BraA10g003730.3C	A10:1965069-1966356	-0.891201	Down		BraA07g036960.3C	A07:25802285-25802909	3.03348	Up
BraA10g003750.3C	A10:1971231-1973667	-1.56079	Down		BraA07g037210.3C	A07:25904169-25905555	3.08135	Up
BraA10g003770.3C	A10:1978690-1980997	-1.86377	Down		BraA07g038050.3C	A07:26257365-26258400	2.09362	Up
BraA10g003810.3C	A10:2000130-2003207	-0.718628	Down		BraA07g038880.3C	A07:26666596-26666935	2.653	Up
BraA10g004300.3C	A10:2261782-2264194	-1.39898	Down		BraA07g039340.3C	A07:26936479-26936816	2.46492	Up
BraA10g004380.3C	A10:2302145-2303564	-2.12984	Down		BraA07g039570.3C	A07:27055271-27055784	2.14233	Up
BraA10g004620.3C	A10:2457834-2458477	-1.83639	Down		BraA07g039800.3C	A07:27142617-27143715	No expression in control samples	Up
BraA10g005430.3C	A10:2887262-2888106	-1.84894	Down		BraA07g040880.3C	A07:27658875-27661505	2.4604	Up
BraA10g005500.3C	A10:2939043-2939343	-1.15674	Down		BraA07g041090.3C	A07:27767386-27768223	2.09348	Up
BraA10g005510.3C	A10:2940321-2945957	-2.72832	Down		BraA07g041540.3C	A07:28013791-28014106	No expression in control samples	Up
BraA10g005550.3C	A10:2957527-2962716	-2.07475	Down		BraA07g041730.3C	A07:28103303-28104572	2.06789	Up
BraA10g005580.3C	A10:2979894-2980404	-1.64813	Down		BraA07g042400.3C	A07:28388655-28393173	3.01458	Up
BraA10g005640.3C	A10:3003091-3005038	-1.00432	Down		BraA07g042910.3C	A07:28577578-28579754	4.94113	Up
BraA10g005800.3C	A10:3126082-3127318	-2.32523	Down		BraA08g000120.3C	A08:62533-64823	4.41227	Up
BraA10g006290.3C	A10:3415697-3418366	-1.65323	Down		BraA08g000450.3C	A08:267116-267803	2.42339	Up
BraA10g006300.3C	A10:3434146-3436457	-1.87456	Down		BraA08g000690.3C	A08:457540-461786	2.11393	Up
BraA10g006450.3C	A10:3567715-3571867	-1.23972	Down		BraA08g001320.3C	A08:901254-903006	No expression in control samples	Up
BraA10g006950.3C	A10:4020864-4022533	-1.85373	Down		BraA08g001680.3C	A08:1179885-1181498	2.59189	Up
BraA10g008260.3C	A10:5796297-5799807	-0.939805	Down		BraA08g002180.3C	A08:1569831-1570874	2.37975	Up
BraA10g010090.3C	A10:8310233-8312198	-0.96989	Down		BraA08g002340.3C	A08:1695141-1699241	2.10037	Up
BraA10g010320.3C	A10:8466792-8467699	-3.04036	Down		BraA08g003560.3C	A08:2601510-2603396	5.91928	Up
BraA10g010710.3C	A10:8835826-8836540	-1.34027	Down		BraA08g003840.3C	A08:2780054-2782354	2.69811	Up
BraA10g010720.3C	A10:8837139-8838793	-1.2993	Down		BraA08g005070.3C	A08:3785612-3786245	2.83687	Up
BraA10g010730.3C	A10:8848522-8851143	-1.11642	Down		BraA08g005640.3C	A08:4490869-4491317	No expression in control samples	Up
BraA10g010760.3C	A10:8888762-8888984	No expression in ionculated samples	Down		BraA08g005780.3C	A08:4599556-4602460	2.78261	Up
BraA10g011200.3C	A10:9246464-9250985	-1.85189	Down		BraA08g006150.3C	A08:5005702-5007571	2.11101	Up
BraA10g011480.3C	A10:9433208-9435326	-1.79701	Down		BraA08g006200.3C	A08:5036696-5041403	2.68525	Up
BraA10g011660.3C	A10:9602488-9603589	-0.822303	Down		BraA08g006460.3C	A08:5335156-5338463	2.37281	Up
BraA10g011810.3C	A10:9731238-9733948	-0.923162	Down		BraA08g006610.3C	A08:5499701-5502196	3.02044	Up
BraA10g011840.3C	A10:9752315-9754506	-1.62247	Down		BraA08g006950.3C	A08:5911529-5912675	2.00442	Up
BraA10g012240.3C	A10:10141003-10143089	-2.04166	Down		BraA08g007920.3C	A08:6995887-6996967	2.25881	Up
BraA10g012420.3C	A10:10249682-10255401	-1.77856	Down		BraA08g008350.3C	A08:7381019-7382879	3.07075	Up
BraA10g012470.3C	A10:10295574-10298148	-1.48284	Down		BraA08g009420.3C	A08:8333595-8334510	2.78014	Up
BraA10g012990.3C	A10:10680079-10680457	-0.987663	Down		BraA08g009630.3C	A08:8541816-8542164	3.71631	Up
BraA10g013140.3C	A10:10776972-10779640	-1.31495	Down		BraA08g009670.3C	A08:8568869-8574332	2.94504	Up
BraA10g013340.3C	A10:10921907-10922942	-3.97296	Down		BraA08g009680.3C	A08:8591656-8593774	2.5955	Up
BraA10g013400.3C	A10:10962274-10966319	-1.03024	Down		BraA08g010180.3C	A08:8941197-8944772	2.42826	Up
BraA10g013780.3C	A10:11165873-11167409	-1.04583	Down		BraA08g010980.3C	A08:9550994-9552875	2.28477	Up
BraA10g013880.3C	A10:11253902-11257249	-0.980475	Down		BraA08g011230.3C	A08:9829621-9830871	2.38101	Up
BraA10g014020.3C	A10:11315854-11318683	-1.15558	Down		BraA08g011540.3C	A08:10057630-10060384	No expression in control samples	Up
BraA10g014040.3C	A10:11333563-11333815	No expression in ionculated samples	Down		BraA08g011590.3C	A08:10104851-10105268	No expression in control samples	Up
BraA10g014050.3C	A10:11334280-11334652	-1.82799	Down		BraA08g012680.3C	A08:10946524-10947454	2.74361	Up
BraA10g014110.3C	A10:11360796-11361354	No expression in ionculated samples	Down		BraA08g012730.3C	A08:10961562-10962379	2.38556	Up
BraA10g014650.3C	A10:11706919-11708803	-1.45248	Down		BraA08g013590.3C	A08:11620312-11622045	4.0853	Up
BraA10g014690.3C	A10:11750088-11751736	-3.36063	Down		BraA08g014910.3C	A08:12334675-12335925	2.36119	Up
BraA10g014710.3C	A10:11763252-11771400	-1.30808	Down		BraA08g015400.3C	A08:12696240-12698844	2.10914	Up
BraA10g014900.3C	A10:11894905-11897742	-1.0882	Down		BraA08g016190.3C	A08:13207938-13208628	4.05079	Up
BraA10g015660.3C	A10:12230801-12231731	-1.59741	Down		BraA08g016620.3C	A08:13483051-13484589	2.26264	Up
BraA10g016100.3C	A10:12523115-12525242	-1.28702	Down		BraA08g017060.3C	A08:13821807-13822700	2.24934	Up
BraA10g016140.3C	A10:12538938-12543923	-0.73394	Down		BraA08g017290.3C	A08:13993600-13995444	2.47336	Up
BraA10g016210.3C	A10:12575359-12577193	-2.84457	Down		BraA08g018140.3C	A08:14450404-14451851	4.34801	Up
BraA10g016420.3C	A10:12655308-12657042	-1.41934	Down		BraA08g018530.3C	A08:14644006-14645448	2.59409	Up
BraA10g016430.3C	A10:12657605-12661187	-1.53228	Down		BraA08g018590.3C	A08:14659994-14661144	2.8059	Up
BraA10g016660.3C	A10:12748854-12749950	-0.917438	Down		BraA08g018700.3C	A08:14727944-14729264	2.86586	Up
BraA10g016690.3C	A10:12762470-12762758	-1.11971	Down		BraA08g018910.3C	A08:14854065-14855481	3.10244	Up
BraA10g016780.3C	A10:12804612-12806746	-1.58626	Down		BraA08g019540.3C	A08:15169094-15170018	2.14684	Up
BraA10g017270.3C	A10:13063523-13065145	-1.91125	Down		BraA08g019620.3C	A08:15206798-15212160	2.47741	Up
BraA10g017610.3C	A10:13251846-13252790	-1.13657	Down		BraA08g019960.3C	A08:15341457-15342420	2.31174	Up
BraA10g017720.3C	A10:13298172-13300915	-0.746027	Down		BraA08g019990.3C	A08:15356307-15360238	2.20146	Up
BraA10g018290.3C	A10:13555861-13557422	-0.791337	Down		BraA08g020010.3C	A08:15368187-15370027	2.39455	Up
BraA10g018480.3C	A10:13689852-13693833	-1.06912	Down		BraA08g020320.3C	A08:15605805-15607224	3.17926	Up
BraA10g018510.3C	A10:13729940-13730917	No expression in ionculated samples	Down		BraA08g020550.3C	A08:15749347-15754177	3.61847	Up
BraA10g018800.3C	A10:13898213-13902704	-0.944011	Down		BraA08g020820.3C	A08:15868882-15870752	2.47415	Up
BraA10g018940.3C	A10:13996246-13998234	-1.02725	Down		BraA08g020980.3C	A08:15963998-15966408	2.27811	Up
BraA10g018980.3C	A10:14040574-14041135	-1.28423	Down		BraA08g021750.3C	A08:16460537-16462970	2.64211	Up
BraA10g019220.3C	A10:14143560-14144937	-1.32639	Down		BraA08g022480.3C	A08:16867738-16871674	2.0391	Up
BraA10g019370.3C	A10:14237174-14243009	-0.715731	Down		BraA08g022530.3C	A08:16888800-16891975	3.26422	Up
BraA10g019450.3C	A10:14283473-14287589	-0.883727	Down		BraA08g022650.3C	A08:16929398-16931794	3.24061	Up
BraA10g019460.3C	A10:14288708-14291169	-1.23947	Down		BraA08g022990.3C	A08:17068661-17071575	3.20867	Up
BraA10g019870.3C	A10:14541744-14542308	-3.02636	Down		BraA08g023440.3C	A08:17321627-17322687	2.22942	Up
BraA10g021020.3C	A10:15069776-15072705	-1.25146	Down		BraA08g023840.3C	A08:17539171-17539588	2.64059	Up
BraA10g021480.3C	A10:15350837-15352708	-1.89383	Down		BraA08g023980.3C	A08:17596128-17597049	No expression in control samples	Up
BraA10g021500.3C	A10:15358144-15360135	-1.43489	Down		BraA08g025570.3C	A08:18418120-18419200	4.71921	Up
BraA10g021640.3C	A10:15449447-15451426	-1.22137	Down		BraA08g026660.3C	A08:18954867-18955434	2.67169	Up
BraA10g022460.3C	A10:15792240-15793385	-1.2063	Down		BraA08g027170.3C	A08:19248515-19251129	4.88814	Up
BraA10g022510.3C	A10:15805906-15807484	-1.78635	Down		BraA08g027700.3C	A08:19501934-19503208	2.206	Up
BraA10g022730.3C	A10:15935127-15937241	-1.25628	Down		BraA08g027740.3C	A08:19520501-19523528	2.53761	Up
BraA10g022790.3C	A10:15951568-15952520	-5.02761	Down		BraA08g027750.3C	A08:19527254-19530473	6.13449	Up
BraA10g022970.3C	A10:16025958-16030470	-1.58381	Down		BraA08g027790.3C	A08:19544908-19547015	2.25352	Up
BraA10g023170.3C	A10:16130325-16132305	-2.24575	Down		BraA08g028560.3C	A08:19901077-19902906	4.1422	Up
BraA10g023180.3C	A10:16135467-16137471	-1.20523	Down		BraA08g028730.3C	A08:19984752-19986011	2.76429	Up
BraA10g023200.3C	A10:16161360-16168134	-1.45459	Down		BraA08g029030.3C	A08:20103719-20104307	No expression in control samples	Up
BraA10g023420.3C	A10:16257533-16260362	-1.64355	Down		BraA08g029450.3C	A08:20276724-20277879	2.54148	Up
BraA10g023620.3C	A10:16344433-16346975	-1.57489	Down		BraA08g029730.3C	A08:20375729-20376506	2.06053	Up
BraA10g023650.3C	A10:16361118-16362225	-2.51944	Down		BraA08g029760.3C	A08:20384783-20393093	2.20935	Up
BraA10g023660.3C	A10:16362316-16363792	-2.31802	Down		BraA08g029820.3C	A08:20417852-20419675	2.25852	Up
BraA10g023680.3C	A10:16369302-16370737	-2.13397	Down		BraA08g030410.3C	A08:20630438-20630909	5.85545	Up
BraA10g023710.3C	A10:16376795-16379764	-0.854596	Down		BraA08g030480.3C	A08:20649572-20650553	2.19857	Up
BraA10g023720.3C	A10:16381731-16382745	-1.84718	Down		BraA08g031200.3C	A08:20979012-20979426	5.43794	Up
BraA10g023800.3C	A10:16416869-16418034	-1.98285	Down		BraA08g031300.3C	A08:21027889-21029591	3.56633	Up
BraA10g024010.3C	A10:16518316-16521233	-0.742504	Down		BraA08g031320.3C	A08:21033526-21036282	2.19084	Up
BraA10g024040.3C	A10:16534674-16535519	-1.73426	Down		BraA08g031690.3C	A08:21210751-21214207	4.18379	Up
BraA10g024420.3C	A10:16712592-16715541	-2.28286	Down		BraA08g032010.3C	A08:21386649-21388501	2.07975	Up
BraA10g024830.3C	A10:16875165-16878275	-2.42543	Down		BraA08g032480.3C	A08:21600277-21601108	2.0774	Up
BraA10g025130.3C	A10:16979272-16982256	-1.1681	Down		BraA08g032550.3C	A08:21624162-21624910	3.08155	Up
BraA10g025640.3C	A10:17229289-17230525	-2.3942	Down		BraA08g033910.3C	A08:22182958-22185056	4.09473	Up
BraA10g026530.3C	A10:17613347-17615049	-1.48766	Down		BraA08g035100.3C	A08:22614268-22617681	2.50822	Up
BraA10g026550.3C	A10:17619269-17619673	No expression in ionculated samples	Down		BraA08g035160.3C	A08:22631606-22633285	2.46397	Up
BraA10g026880.3C	A10:17768283-17769286	-2.19717	Down		BraA09g000130.3C	A09:46570-48342	5.47358	Up
BraA10g027130.3C	A10:17873690-17878112	-1.41641	Down		BraA09g000380.3C	A09:166075-167344	4.48582	Up
BraA10g027530.3C	A10:18053162-18058746	-0.924515	Down		BraA09g000980.3C	A09:583435-584117	2.3153	Up
BraA10g027560.3C	A10:18062541-18064986	-1.49263	Down		BraA09g001010.3C	A09:602291-603516	2.82149	Up
BraA10g027630.3C	A10:18089978-18092530	-2.08429	Down		BraA09g001180.3C	A09:762824-766736	2.80522	Up
BraA10g027740.3C	A10:18138775-18141680	-1.80645	Down		BraA09g001290.3C	A09:801351-803132	2.23396	Up
BraA10g027810.3C	A10:18175044-18178102	-1.28445	Down		BraA09g001460.3C	A09:911403-912808	1.97056	Up
BraA10g028210.3C	A10:18324449-18324992	-1.12721	Down		BraA09g001500.3C	A09:922573-925341	2.56948	Up
BraA10g028990.3C	A10:18625672-18626134	-0.843789	Down		BraA09g001750.3C	A09:1030502-1032349	2.15009	Up
BraA10g029220.3C	A10:18698058-18702813	-1.05419	Down		BraA09g002820.3C	A09:1735006-1736597	3.57832	Up
BraA10g029460.3C	A10:18803813-18804449	-1.57802	Down		BraA09g002920.3C	A09:1786489-1787721	5.48131	Up
BraA10g029480.3C	A10:18815710-18816085	-2.28778	Down		BraA09g003060.3C	A09:1958989-1961906	2.01776	Up
BraA10g029610.3C	A10:18862574-18864693	-1.83579	Down		BraA09g003150.3C	A09:1991159-1992612	2.49689	Up
BraA10g029620.3C	A10:18865092-18866650	-0.752295	Down		BraA09g003330.3C	A09:2067907-2068477	3.67224	Up
BraA10g029850.3C	A10:18968029-18968881	-1.83966	Down		BraA09g003620.3C	A09:2253524-2254229	2.98438	Up
BraA10g030120.3C	A10:19096250-19098090	-1.07375	Down		BraA09g004850.3C	A09:2917466-2919538	2.17556	Up
BraA10g030380.3C	A10:19209455-19211190	-1.06624	Down		BraA09g005760.3C	A09:3340927-3341452	2.28585	Up
BraA10g030640.3C	A10:19321642-19322353	-1.35192	Down		BraA09g005910.3C	A09:3450542-3451118	2.63475	Up
BraA10g030950.3C	A10:19417039-19418604	-0.971956	Down		BraA09g005920.3C	A09:3455901-3456492	2.55457	Up
BraA10g031070.3C	A10:19474317-19476272	-1.185	Down		BraA09g006830.3C	A09:3941807-3943170	2.03493	Up
BraA10g031140.3C	A10:19488835-19490543	-1.15835	Down		BraA09g006840.3C	A09:3943598-3947076	2.22821	Up
BraA10g031470.3C	A10:19620350-19621904	-1.51214	Down		BraA09g007050.3C	A09:4039066-4039678	5.09151	Up
BraA10g031540.3C	A10:19648427-19650764	-0.92288	Down		BraA09g007070.3C	A09:4056404-4058035	No expression in control samples	Up
BraA10g031550.3C	A10:19655905-19658655	-1.66796	Down		BraA09g007260.3C	A09:4175132-4176014	2.79024	Up
BraA10g031610.3C	A10:19696555-19698016	-1.84516	Down		BraA09g007270.3C	A09:4178742-4179342	No expression in control samples	Up
BraA10g031680.3C	A10:19722449-19725570	-0.969613	Down		BraA09g008150.3C	A09:4661155-4661350	2.65727	Up
BraA10g031800.3C	A10:19778313-19780797	-1.13224	Down		BraA09g008440.3C	A09:4831352-4832372	No expression in control samples	Up
BraA10g031820.3C	A10:19786155-19788075	-1.39594	Down		BraA09g008730.3C	A09:4975634-4976512	2.42853	Up
BraA10g031910.3C	A10:19835612-19837809	-0.792756	Down		BraA09g009010.3C	A09:5173175-5175344	4.98448	Up
BraA10g032470.3C	A10:20113239-20117503	-0.766851	Down		BraA09g009020.3C	A09:5178714-5180991	5.57364	Up
BraA10g032650.3C	A10:20228988-20230516	-1.56099	Down		BraA09g009030.3C	A09:5191545-5193738	4.94958	Up
BraA10g032890.3C	A10:20337971-20340091	-1.68643	Down		BraA09g009130.3C	A09:5229359-5229899	3.96865	Up
BraA10g033340.3C	A10:20526527-20528271	-0.899638	Down		BraA09g009540.3C	A09:5431060-5433777	2.67542	Up
BraAnng006380.3C	Scaffold1075:12105-19570	-1.60061	Down		BraA09g009830.3C	A09:5555308-5556297	2.19684	Up
BraAnng006400.3C	Scaffold1075:33402-40876	-1.41886	Down		BraA09g010510.3C	A09:6079366-6079882	2.59478	Up
BraA01g000040.3C	A01:10291-11917	0.797068	Up		BraA09g010830.3C	A09:6232325-6233438	2.48372	Up
BraA01g000170.3C	A01:95214-98101	1.99361	Up		BraA09g011060.3C	A09:6385127-6386399	No expression in control samples	Up
BraA01g000320.3C	A01:156906-158783	0.802771	Up		BraA09g011560.3C	A09:6738053-6740810	3.60909	Up
BraA01g000350.3C	A01:163764-164530	1.48818	Up		BraA09g011990.3C	A09:7050293-7051133	2.17862	Up
BraA01g000830.3C	A01:408319-410126	4.38499	Up		BraA09g012070.3C	A09:7090721-7093007	3.73848	Up
BraA01g001120.3C	A01:521847-523604	1.41927	Up		BraA09g013300.3C	A09:7840163-7842824	2.34275	Up
BraA01g001130.3C	A01:523815-526255	1.18654	Up		BraA09g013650.3C	A09:7986703-7988167	3.89201	Up
BraA01g001150.3C	A01:531905-535022	3.3534	Up		BraA09g014460.3C	A09:8467591-8468044	3.0927	Up
BraA01g001590.3C	A01:799452-800439	1.57055	Up		BraA09g015580.3C	A09:9291573-9293200	2.3959	Up
BraA01g001860.3C	A01:934011-935169	No expression in control samples	Up		BraA09g016320.3C	A09:10025154-10026166	2.64456	Up
BraA01g002030.3C	A01:1013575-1014891	2.11959	Up		BraA09g016490.3C	A09:10128864-10132500	2.75668	Up
BraA01g002490.3C	A01:1249793-1251120	1.14319	Up		BraA09g018390.3C	A09:11705250-11705910	2.72194	Up
BraA01g002570.3C	A01:1293382-1293862	1.37488	Up		BraA09g018490.3C	A09:11838887-11841079	No expression in control samples	Up
BraA01g002670.3C	A01:1338003-1340428	1.51786	Up		BraA09g018740.3C	A09:11994851-11995941	3.81017	Up
BraA01g002690.3C	A01:1343833-1346708	1.48815	Up		BraA09g019110.3C	A09:12243446-12245342	2.26608	Up
BraA01g002890.3C	A01:1424613-1425521	2.26423	Up		BraA09g019650.3C	A09:12640540-12640837	2.44168	Up
BraA01g003090.3C	A01:1509292-1512263	1.17629	Up		BraA09g020280.3C	A09:13134500-13135000	2.41667	Up
BraA01g003410.3C	A01:1700837-1703139	1.88758	Up		BraA09g020570.3C	A09:13331294-13347487	2.43693	Up
[truncated: 2,107 more rows]

## Sheet: Table S7
Supplementary Table S7. Fold change of expression levels in infected samples compared with noninfected samples
	Fold change (infected/noninfected)
	RNA-seq			qPCR
	'Misugi'	'Nanane'		'Misugi'	'Nanane'
BraA08g025160.3C	2.78192	1.56873		4.44703	3.70217
BraA09g060940.3C	2.89344	2.89835		8.81279	4.18902
BraA10g002450.3C	0.576259	1.50419		1.27305	3.67893
BraA07g015170.3C	1.0896	2.05661		4.9918	6.97617
BraA04g028840.3C	3.30346	16.0129		3.18021	55.2798
BraA08g000690.3C	2.90916	2.05083		18.1897	8.5969
BraA02g042070.3C	29.4315	5.28275		61.8387	4.21896
The correlation coefficient of fold change (infected/noninfected) between RNA-seq and qPCR was 0.97 in 'Misugi' and 0.96 in 'Nanane'.

## Sheet: Table S8
Supplementary Table S8. Differentially expressed genes associated with differentially methylated regions
Cultivar	Gene ID	Database	ID	Domain	A. thaliana orthologs	A. thaliana gene function
Misugi	BraA08g025160.3C	Pfam	PF00118	TCP-1/cpn60 chaperonin family	AT1G24510	CCT5, CHAPERONIN CONTAINING T-COMPLEX POLYPEPTIDE-1 SUBUNIT 5
Misugi		PRINTS	PR00304	Tailless complex polypeptide 1 (chaperone) signature
Misugi	BraA06g000420.3C	Pfam	PF00650	CRAL/TRIO domain	AT1G55690	Sec14p-like phosphatidylinositol transfer family protein;(source:Araport11)
		Pfam	PF03765	CRAL/TRIO, N-terminal domain
		Pfam	PF00400	WD domain, G-beta repeat
Misugi		SMART	SM00516 (IPR001251)	CRAL-TRIO lipid binding domain
		SMART	SM01100 (IPR011074)	CRAL/TRIO, N-terminal domain
		SMART	SM00320 (IPR001680)	WD40 repeat
Nanane	BraA03g007980.3C	Pfam	PF14009	Domain of unknown function (DUF4228)	Not found
Nanane	BraA09g010440.3C	Pfam	PF08541	3-Oxoacyl-[acyl-carrier-protein (ACP)] synthase III C terminal	AT2G16280	3-KETOACYL-COA SYNTHASE 9, KCS9
		Pfam	PF08392	FAE1/Type III polyketide synthase-like protein
Nanane	BraA01g007120.3C	Pfam	PF00122	E1-E2 ATPase	Not found
		Pfam	PF00702	haloacid dehalogenase-like hydrolase
Nanane		PRINTS	PR00119	P-type cation-transporting ATPase superfamily signature
Misugi	BraA10g002450.3C	Pfam	PF02469	Fasciclin domain	AT1G03870	FASCICLIN-LIKE ARABINOOGALACTAN 9, FLA9
Misugi		SMART	SM00554 (IPR000782)	FAS1 domain
Nanane	BraA08g012250.3C	Pfam	PF00076	RNA recognition motif. (a.k.a. RRM, RBD, or RNP domain)	Not found
Nanane		SMART	SM00360 (IPR000504)	RNA recognition motif domain
Misugi	BraA09g021410.3C	Pfam	PF04520	Senescence regulator	AT5G45630	senescence regulator (Protein of unknown function, DUF584);(source:Araport11)
Misugi	BraA09g060940.3C	Pfam	PF00743	Flavin-binding monooxygenase-like	Not found
Misugi		PRINTS	PR00370	Flavin-containing monooxygenase (FMO) signature
Misugi	BraA03g060690.3C	PRINTS	PR01217	Proline rich extensin signature	Not found
Misugi	BraA06g019710.3C				AT3G47295	hypothetical protein;(source:Araport11)
Misugi	BraA08g005490.3C				AT1G45688	CC1, COMPANION OF CELLULOSE SYNTHASE 1
Nanane	BraA07g015170.3C				AT1G21500	hypothetical protein;(source:Araport11)
